# Supplementary material
Source: publisher figshare collection journal article supplement (https://gsajournals.figshare.com/ndownloader/files/17906834)
Supplement: Supplementary file 1 [file 17906834]

## Sheet: Additional File A
Additional File A: NanoDrop and Bioanalyzer results to assess RNA extration quality for Cyst samples. Samples Cyst.12, Cyst.13 and Cyst.15 were utilized as samples for RNA-sequencing as they portrayed the strongest bands with the highest concentration of DNA.
Sample	Conc. (ng/uL)	28S/18S	Bands	Replicate
Cyst.1	1.4859	Yes	Weak	-
Cyst.2	1.7174	Yes	Medium	-
Cyst.3	0.0564	No	Absent	-
Cyst.4	2.8724	Yes	Medium	-
Cyst.5	3.3345	Yes	Medium	-
Cyst.6	1.2156	Yes	Medium	-
Cyst.7	2.9624	Yes	Strong	-
Cyst.8	1.0012	Yes	Medium	-
Cyst.9	1.0933	Yes	Strong	-
Cyst.10	2.4982	Yes	Strong	-
Cyst.11	1.9597	Yes	Medium	-
Cyst.12	5.0092	Yes	Strong	C1
Cyst.13	4.2122	Yes	Strong	C2
Cyst.14	2.091	Yes	Strong	-
Cyst.15	3.058	Yes	Strong	C3
Cyst.16	1.4515	Yes	Medium	-
Cyst.17	2.0247	Yes	Medium	-
Cyst.18	2.1304	Yes	Medium	-
Cyst.19	1.5952	No	Absent	-
Cyst.20	2.0474	Yes	Medium	-
Cyst.21	0.0763	No	Absent	-

## Sheet: Additional File B 
Additional File B: Number of raw, trimmed and normalized sequencing reads the polyp, medusa and the cyst stage. Prior to de novo assembly, quality trimming was conducted using the Trimmomatic tool (Lohse et al., 2012) within Trinity version 2.2.0 using default parameters optimized by MacManes (2014). The trimmed reads were then normalized through Trinity’s in silico normalization to reduce read r…
	Polyp	Medusa	Cyst
Raw Reads	47,008,570 (23,504,285 paired)	42,190,870 (21,095,435 paired)	90,019,818 (45,009,909 paired)
Trimmed Reads	46,947,184 (23,473,592 paired)	42,002,298 (21,001,149 paired)	89,811,296 (44,905,648 paired)
Normalized Reads	17,552,220 (8,776,110 paired)	6,220,660 (3,110,330 paired)	11289162 (5,644,581 paired)

## Sheet: Additional File C 
Additional File C: Cyst RNA-seq alignment to evaluate triplicate datasets. FastQC reported a high number of low-quality reads and an abnormally high and unparalleled GC% content for the Cyst2 dataset (48% and 50%, paired end) in comparison to Cyst1 (both 39%) and Cyst3 (both 41%), and even more so when compared to the Polyp (37.22%) and Medusa (37.17%) assemblies (Table 1). To further assess the …
Cyst1	% Reads mapped	0.9298	0.949	0.9695
	% Broken pairs	0.1061	0.1436	0.1664
	Est. paired distance	128-594 bp	130-594 bp	128-594 bp
Cyst2	% Reads mapped	0.0968	0.9191	0.919
	% Broken pairs	0.0873	0.6054	0.6058
	Est. paired distance	0-3830 bp *	0-240 bp	0-240 bp
Cyst3	% Reads mapped	0.9097	0.8871	0.9502
	% Broken pairs	0.1465	0.1502	0.1954
	Est. paired distance	172-596 bp	128-596 bp	172-596 bp
	*= Few pairs mapped

## Sheet: Additional File D 
Additional File D: Read mapping evaluation of transcriptomes. Normalized reads resulting from Trinity’s in silico normalization were mapped back to the assembled contigs for each transcriptome to evaluate the completeness of assembly. A high mapping percentage indicates that the de novo assembly incorporated the majority of sequenced reads and represents high completeness in the transcriptome in …
	TopHat				CLC Genomic Workbench
	Polyp	Medusa	Cyst		Polyp	Medusa	Cyst
Input Reads (normalized)	17552220	6220660	11289162		17552220	6220660	11289162
Mapped Reads	12205483	5050091	9029379		14770198	5915526	11168291
Read Mapping %	0.695	0.811826	0.799827		0.8415	0.950948	0.989293

## Sheet: Additional File E
Additional File E: KEGG Enzyme mapping- the top 50 enzymatic pathways with the most sequences in all three stages. Transcripts with enzyme commission (EC) codes were mapped to pathways found in the Kyoto Encyclopedia of Genes and Genomes (KEGG) [67]. The Polyp had 13,539 transcripts map to 1,221 enzymes within 131 enzymatic pathways. The Medusa had 7,581 transcripts mapped to 1,075 enzymes within…
Polyp				Medusa				Cyst
#	Pathways	# Sequences	# Enzymes	#	Pathways	# Sequences	# Enzymes	#	Pathways	# Sequences	# Enzymes
1	Purine Metabolism	2712	47	1	Purine Metabolism	1550	45	1	Purine metabolism	2045	50
2	Thiamine metabolism	2350	4	2	Thiamine metabolism	1272	4	2	Thiamine metabolism	1665	3
3	Biosynthesis of antibiotics	802	127	3	Biosynthesis of antibiotics	309	106	3	Biosynthesis of antibiotics	599	144
4	Aminobenzoate degredation	376	7	4	Aminobenzoate degradation	270	6	4	Aminobenzoate degradation	318	6
5	Oxidative phosphorylation	351	7	5	Pyrimidine metabolism	209	31	5	Pyrimidine metabolism	300	32
6	T cell receptor signaling pathway	289	2	6	T cell receptor signaling pathway	196	2	6	T cell receptor signaling pathway	229	2
7	Pyrimidine metabolism	279	32	7	Th1 and Th2 cell differentiation	175	1	7	Th1 and Th2 cell differentiation	204	1
8	Glycolysis/Gluconeogenesis	262	25	8	Phosphatidylinositol signaling pathway	125	19	8	Oxidative phosphorylation	176	8
9	Th1 and Th2 cell differentiation	256	1	9	Drug metabolism - other enzymes	124	13	9	Citrate cycle (TCA cycle)	148	19
10	Cysteine and methionine metabolism	223	29	10	Glutathione metabolism	116	15	10	Cysteine and methionine metabolism	138	35
11	Carbon fixation in photosynthetic organisms	176	18	11	Lysine degradation	110	9	11	Glycolysis / Gluconeogenesis	132	25
12	Glutathione metabolism	173	15	12	Oxidative phosphorylation	101	9	12	Glutathione metabolism	131	15
13	Citrate cycle (TCA cycle)	162	18	13	Inositol phosphate metabolism	93	7	13	Aminoacyl-tRNA biosynthesis	129	20
14	Pyruvate metabolism	161	23	14	Cysteine and methionine metabolism	92	27	14	Tryptophan metabolism	125	13
15	Glyoxylate and dicarboxylate metabolism	157	23	15	Glycerophospholipid metabolism	85	19	15	Carbon fixation pathways in prokaryotes	125	20
16	Carbon fixation pathway in prokaryotes	153	22	16	Amino sugar and nucleotide sugar metabolism	79	28	16	Amino sugar and nucleotide sugar metabolism	124	33
17	Arginine and proline metabolism	141	23	17	Arginine and proline metabolism	78	28	17	Pyruvate metabolism	123	26
18	Methane metabolism	136	17	18	Pyruvate metabolism	71	21	18	Phosphatidylinositol signaling system	114	17
19	Drug metabolism - other enzymes	135	13	19	Glycolysis/Gluconeogenesis	69	22	19	Valine, leucine and isoleucine degradation	110	18
20	Glycine, serine and threonine metabolism	132	23	20	Valine, leucine and isoleucine degradation	68	17	20	Arginine and proline metabolism	104	20
21	Alanine, aspartate and glutamate metabolism	130	23	21	Alanine, aspartate and glutamate metabolism	66	23	21	Alanine, aspartate and glutamate metabolism	100	22
22	Inositol phosphate metabolism	123	22	22	Tryptophan metabolism	65	13	22	Glycine, serine and threonine metabolism	98	35
23	Phenylpropanoid biosynthesis	121	3	23	Aminoacyl-tRNA biosynthesis	65	20	23	Glycerophospholipid metabolism	91	20
24	Valine, leucine and isoleucine degredation	118	21	24	Glycine, serine and threonine metabolism	61	27	24	Glyoxylate and dicarboxylate metabolism	84	15
25	Phosphatidylinositol signaling system	118	21	25	Carbon fixation pathways in prokaryotes	61	18	25	Inositol phosphate metabolism	83	18
26	Pentose phosphate pathway	118	16	26	Phenylpropanoid biosynthesis	58	2	26	Fatty acid degradation	82	9
27	Amino sugar and nucleotide sugar metabolism	117	30	27	beta-Alanine metabolism	57	12	27	Pentose phosphate pathway	82	15
28	Lysine degredation	115	12	28	Glycerolipid metabolism	57	13	28	Glycerolipid metabolism	81	14
29	Tryptophan metabolism	108	16	29	Glyoxylate and dicarboxylate metabolism	55	17	29	Phenylpropanoid biosynthesis	74	2
30	Aminoacyl-tRNA biosynthesis	101	20	30	Citrate cycle (TCA cycle)	55	16	30	Butanoate metabolism	73	15
31	Arginine biosynthesis	94	13	31	Other glycan degradation	49	7	31	Nicotinate and nicotinamide metabolism	71	15
32	Glycerophospholipid metabolism	94	17	32	Fatty acid degradation	47	8	32	beta-Alanine metabolism	65	11
33	Fatty acid degredation	92	11	33	Pentose phosphate pathway	47	15	33	Propanoate metabolism	65	19
34	Fructose and mannose metabolism	90	19	34	Histidine metabolism	46	7	34	Fructose and mannose metabolism	62	16
35	Porphyrin and chlorophyll metabolism	86	14	35	Sphingolipid metabolism	43	10	35	Arginine biosynthesis	62	12
36	Glycerolipid metablism	83	14	36	Ether lipid metabolism	43	5	36	Other glycan degradation	58	7
37	Ascorbate abd aldarate metabolism	74	6	37	Cyanoamino acid metabolism	42	3	37	Histidine metabolism	57	10
38	beta-Alanine metabolism	72	16	38	Arachidonic acid metabolism	42	8	38	Starch and sucrose metabolism	56	17
39	Nitgoren metabolism	68	9	39	Porphyrin and chlorophyll metabolism	40	14	39	Methane metabolism	54	13
40	Ether lipid metabolism	68	7	40	Nicotinate and nicotinamide metabolism	40	14	40	Ascorbate and aldarate metabolism	54	5
41	Propanoate metabolism	68	17	41	Taurine and hypotaurine metabolism	39	4	41	Nitrogen metabolism	52	10
42	Histidine metabolism	64	7	42	Methane metabolism	39	14	42	alpha-Linolenic acid metabolism	50	6
43	Sphingolipid metabolism	63	13	43	Butanoate metabolism	39	12	43	Carbon fixation in photosynthetic organisms	50	15
44	One carbon pool by folate	60	14	44	Ascorbate and aldarate metabolism	39	5	44	One carbon pool by folate	49	13
45	Arachidonic acid metabolism	59	10	45	Stach and sucrose metabolism	38	13	45	Arachidonic acid metabolism	49	8
46	Starch and sucrose metabolism	58	17	46	N-Glycan biosynthesis	36	10	46	Limonene and pinene degradation	46	2
47	Other glycan degradation	57	8	47	Arginine biosynthesis	35	10	47	N-Glycan biosynthesis	45	12
48	alpha-Linolenic acid metabolism	56	5	48	alpha-Linolenic acid metabolism	35	5	48	Phenylalanine metabolism	45	13
49	Drug metabolism - cytochrome p450	56	5	49	mTOR signaling pathway	34	3	49	Chloroalkane and chloroalkene degradation	44	4
50	Tyrosine metabolism	53	13	50	One carbon pool by folate	34	14	50	Porphyrin and chlorophyll metabolism	43	15
51	Cyanoamino acid metabolism	50	4	51	Tyrosine metabolism	33	13	51	Fatty acid elongation	43	7
52	Butanoate metabolism	48	15	52	Fructose and mannose metabolism	32	19	52	Galactose metabolism	40	14
53	Choloralkane and choloraklene degradation	48	4	53	Drug metabolism - cytochrome P450	32	4	53	Ether lipid metabolism	39	8
54	Limonene and pinene degradation	45	2	54	Fatty acid elongation	31	5	54	Insect hormone biosynthesis	37	1
55	Nicotinate and nictotinamide metabolism	44	13	55	Phenylalanine metabolism	31	11	55	Pantothenate and CoA biosynthesis	35	13
56	Galactose metabolism	44	15	56	Various types of N-glycan biosynthesis	31	6	56	Biosynthesis of unsaturated fatty acids	35	8
57	Phenylalanine metabolism	44	10	57	Propanoate metabolism	31	12	57	Various types of N-glycan biosynthesis	35	7
58	Insect hormone biosynthesis	43	1	58	Panthothenate and CoA biosynthesis	29	8	58	Benzoate degradation	33	9
59	Selenocompound metabolism	43	9	59	Glysoaminoglycan degradation	28	5	59	Terpenoid backbone biosynthesis	33	13
60	N-Glycan biosynthesis	41	10	60	Limonene and pinene degradation	28	2	60	Tyrosine metabolism	33	12
61	mTOR signaling pathway	40	3	61	Galactose metabolism	28	14	61	Riboflavin metabolism	33	7
62	Metabolism by xenobiotics by cytochrome P450	39	5	62	Carbon fixation in photosynthetic organisms	27	14	62	Pentose and glucuronate interconversions	32	10
63	Fatty acid elongation	36	8	63	Chloroalkane and chloroalkene degradation	26	3	63	Selenocompound metabolism	31	7
64	Pentose and glucuronate interconversions	36	10	64	Linoleic acid metabolism	24	2	64	Sphingolipid metabolism	31	9
65	Taurine and hypotaurine metablolism	35	5	65	Nitrogen metabolism	24	8	65	Drug metabolism - cytochrome P450	30	5
66	Terpenoid backbone biosynthesis	35	13	66	Insect hormone biosynthesis	24	1	66	Geraniol degradation	29	4
67	Linoleic acid metabolism	34	3	67	Pentose and glucuronate interconversions	24	13	67	Sulfur metabolism	28	10
68	Various types of N-glycan biosynthesis	34	6	68	Metabolism of xenobiotics by cytochrome P450	20	3	68	mTOR signaling pathway	26	3
69	Biosynthesis of unsaturated fatty acids	31	9	69	Geraniol degradation	20	4	69	Caprolactam degradation	26	3
70	Panthothenate and CoA biosynthesis	29	14	70	Glycosphingolipid biosynthesis - ganglio series	19	2	70	Valine, leucine and isoleucine biosynthesis	25	7
71	Geraniol degredation	28	4	71	Folate biosynthesis	19	9	71	Taurine and hypotaurine metabolism	25	4
72	Glycosphingolipid biosynthesis - globo and isoglobo series	28	3	72	Benzoate degradation	18	3	72	Toluene degradation	24	4
73	D-glutamine and D-glutamate metabolism	28	3	73	Terpenoid backbone biosynthesis	19	11	73	Styrene degradation	22	4
74	Caprolactam degradation	27	4	74	Caprolactam degradation	17	3	74	Linoleic acid metabolism	22	2
75	Benzoate degradation	26	4	75	Toluene degradation	16	2	75	Folate biosynthesis	22	8
76	Glycosaminoglycan degradation	26	4	76	Ubiquinone and other terpenoid-quinone biosynthesis	16	4	76	Phenylalanine, tyrosine and tryptophan biosynthesis	22	14
77	Sulfur metabolism	26	7	77	PI3K-Akt signaling pathway	16	1	77	Fatty acid biosynthesis	21	11
78	Phenylalanine, tyrosine and tryptophan biosynthesis	25	7	78	Glycosphingolipid biosynthesis - globo and isoglobo series	15	3	78	Cyanoamino acid metabolism	21	4
79	Glycosphingolipid biosynthesis - ganglio series	23	2	79	Primary bile acid biosynthesis	14	1	79	Metabolism of xenobiotics by cytochrome P450	20	5
80	Tropane, piperidine and pyridine alkaloid biosynthesis	22	6	80	Phenylalanine, tyrosine and tryptophan biosynthesis	14	7	80	Streptomycin biosynthesis	20	6
81	Ubiquinone and other terpenoid-quinone biosynthesis	22	3	81	D-glutamine and D-glutamate metabolism	14	3	81	Primary bile acid biosynthesis	19	2
82	Vitamin B6 metabolism	21	4	82	D-Arginine and D-ornithine metabolism	13	2	82	Glycosaminoglycan degradation	19	5
83	Isoquinoline alkaloid biosynthesis	21	4	83	Selenocompound metabolism	13	7	83	Lysine biosynthesis	18	11
84	Fatty acid biosynthesis	20	5	84	Vitamin B6 metabolism	12	4	84	Retinol metabolism	18	6
85	Primary bile acid biosynthesis	20	4	85	Streptomycin biosynthesis	12	5	85	D-Glutamine and D-glutamate metabolism	17	4
86	Folate biosynthesis	20	6	86	Isoquinoline alkaloid biosynthesis	12	5	86	C5-Branched dibasic acid metabolism	16	3
87	Valine, leucine and isoleucine biosynthesis	18	3	87	Biosynthesis of unsaturated fatty acids	11	4	87	Ubiquinone and other terpenoid-quinone biosynthesis	16	4
88	Toluene degradation	18	1	88	Retinol metabolism	11	3	88	Glycosphingolipid biosynthesis - ganglio series	14	2
89	Novobiocin biosynthesis	18	4	89	Novobiocin biosynthesis	10	4	89	D-Arginine and D-ornithine metabolism	14	2
90	D-Arginine and D-ornithine metabolism	17	2	90	Tropane, piperidine and pyridine alkaloid biosynthesis	10	4	90	Synthesis and degradation of ketone bodies	13	4
91	Steroid hormone biosynthesis	17	6	91	Sulfur metabolism	9	6	91	Glycosphingolipid biosynthesis - globo and isoglobo series	12	2
92	Retinol metabolism	17	4	92	Steroid hormone biosynthesis	9	3	92	Biotin metabolism	11	7
93	Streptomycin biosynthesis	15	6	93	Valine, leucine and isoleucine biosynthesis	8	2	93	Steroid hormone biosynthesis	11	3
94	Mannose type O-glycan biosynthesis	14	2	94	Lysine biosynthesis	8	1	94	Other types of O-glycan biosynthesis	10	2
95	Phosphonate and phosphinate metabolism	13	5	95	Mannose type O-glycan biosynthesis	8	2	95	Glycosylphosphatidylinositol (GPI)-anchor biosynthesis	10	2
96	Styrene degradation	12	5	96	Glycosaminoglycan biosynthesis - heparan sulfate / heparin	8	6	96	Ethylbenzene degradation	10	1
97	Lysine biosynthesis	12	2	97	Other types of O-glycan biosynthesis	7	2	97	Novobiocin biosynthesis	9	4
98	PI3K-Akt signaling pathway	12	1	98	Fatty acid biosynthesis	7	4	98	Tropane, piperidine and pyridine alkaloid biosynthesis	9	4
99	Monobactam biosynthesis	11	2	99	Synthesis and degradation of ketone bodies	6	3	99	PI3K-Akt signaling pathway	9	1
100	Other types of O-glycan biosynthesis	11	2	100	Glycosaminoglycan biosynthesis - chondroitin sulfate / dermatan sulfate	6	3	100	Mannose type O-glycan biosynthesis	9	2
101	C5-Branched dibasic acid metabolism	11	1	101	Flavone and flavonol biosynthesis	5	1	101	Isoquinoline alkaloid biosynthesis	9	3
102	Biotin metabolism	10	3	102	Biotin metabolism	5	1	102	Monobactam biosynthesis	8	3
103	Synthesis and degradation of ketone bodies	9	4	103	Cutin, suberine and wax biosynthesis	5	1	103	Phosphonate and phosphinate metabolism	8	4
104	Ethylbenzene degradation	9	1	104	Styrene degradation	4	3	104	Vitamin B6 metabolism	8	5
105	Glucosinolate biosynthesis	9	1	105	Phophonate and phosphonite metabolism	4	3	105	Cutin, suberine and wax biosynthesis	7	1
106	Glycosaminoglycan biosynthesis - heparan sulfate / heparin	8	3	106	Steroid biosynthesis	4	3	106	Biosynthesis of ansamycins	7	1
107	Biosynthesis of ansamycins	7	1	107	Glycosylphosphatidylinositol (GPI)-anchor biosynthesis	4	1	107	Lipoic acid metabolism	6	2
108	Glycosylphosphatidylinositol (GPI)-anchor biosynthesis	6	2	108	Penicillin and cephalosporin biosynthesis	4	1	108	Steroid degradation	6	2
109	Bisphenol degradation	6	1	109	Ethylbenzene degradation	4	1	109	Glucosinolate biosynthesis	6	1
110	Aflatoxin biosynthesis	6	1	110	Aflatoxin biosynthesis	4	1	110	Aflatoxin biosynthesis	5	1
111	Tetracycline biosynthesis	6	1	111	Tetracyclin biosynthesis	4	1	111	Peptidoglycan biosynthesis	4	4
112	Glycosaminoglycan biosynthesis - chondroitin sulfate / dermatan sulfate	6	2	112	Lipoic acid metabolism	3	1	112	Neomycin, kanamycin and gentamicin biosynthesis	4	2
113	Cutin, suberine and wax biosynthesis	6	1	113	Mucin type O-glycan biosynthesis	3	2	113	Penicillin and cephalosporin biosynthesis	4	1
114	Steroid biosynthesis	5	5	114	Neomycin, kanamycin and gentamicin biosynthesis	3	2	114	Chlorocyclohexane and chlorobenzene degradation	4	3
115	Steroid degradation	5	3	115	Riboflavin metabolism	3	1	115	Mucin type O-glycan biosynthesis	3	2
116	Penicillin and cephalosporin biosynthesis	5	3	116	Monobactam biosynthesis	3	1	116	Glycosaminoglycan biosynthesis - heparan sulfate / heparin	3	2
117	Mucin type O-glycan biosynthesis	4	2	117	Glycosaminoglycan biosynthesis - kertan sulfate	2	1	117	Xylene degradation	3	2
118	Lipoic acid metabolism	3	1	118	Steroid degradation	2	1	118	Lipopolysaccharide biosynthesis	2	2
119	Riboflavin metabolism	3	2	119	Xylene degradation	2	1	119	Fluorobenzoate degradation	2	1
120	Peptidoglycan biosynthesis	2	2	120	Clucosinolate biosynthesis	2	1	120	Flavone and flavonol biosynthesis	2	1
121	Neomycin, kanamycin and gentamicin biosynthesis	2	2	121	Carbapenem biosynthesis	2	1	121	Dioxin degradation	2	1
122	Naphthalene degradation	2	1	122	Glycosphingolipid biosynthesis - lacto and neolacto series	2	1	122	Steroid biosynthesis	2	2
123	Carbapenem biosynthesis	2	1	123	CS-Branched dibasic acid metabolism	1	1	123	Phenazine biosynthesis	2	1
124	Chlorocyclohexane and chlorobenzene degradation	2	1	124	Peptidoglycan biosynthesis	1	1	124	Bisphenol degradation	2	1
125	Glycosphingolipid biosynthesis - lacto and neolacto series	2	1	125	Betalain biosynthesis	1	1	125	Indole alkaloid biosynthesis	2	1
126	Fluorobenzoate degradation	1	1	126	Photosynthesis	1	1	126	Naphthalene degradation	2	2
127	Polyketide sugar unit biosynthesis	1	1	127	Indole alkaloid biosynthesis	1	1	127	Zeatin biosynthesis	2	1
128	beta-Lactam resistance	1	1	128	Zeatin biosynthesis	1	1	128	Polyketide sugar unit biosynthesis	1	1
129	Biosynthesis of vancomycin group antibiotics	1	1	129	Biosynthesis of ansamycins	1	1	129	Biosynthesis of vancomycin group antibiotics	1	1
130	Acarbose and validamycin biosynthesis	1	1	130	Chlorocyclohexane and chlorobenzene degradation	1	1	130	Acarbose and validamycin biosynthesis	1	1
131	Indole alkaloid biosynthesis	1	1

## Sheet: Additional File F
Additional File F: De novo assembly statistics, gene content completeness, and function annotation comparison among cnidarian transcriptomes. [- = not reported; *= individually not reported; **= based on longest unique transcript, ***= filtered to minimum 300bp, NC= not comparable to our methods/reduced dataset; N/A= not available/reported]. Turritopsis sp. (Hasegawa et al. 2016), H. vulgaris (We…
		De Novo Assembly Statistics							Gene Content Completeness			Annotation
Class	Species	Assembly method	# of unique transcripts	# of transcripts (non-filtered)	% GC	Contig N50	Mean contig length	Total assembled bases	Assessment method	Complete %	Including Partial %	Annotation Method	% BLASTx hits	% GO term annotated (of BLAST hits)
Hydrozoan	Turritopsis dohrnii	Trinity	58,312 - 76,456	74,639 - 92,659	37.13 - 38.25%	1,332 - 1,634	737.35 - 1,010.57	~ 64.5 - 87.3 Mb	BUSCO (metazoa)	91.3 - 95.4%	94.9 - 97.6%	B2G and InterProScan	44.65 - 49.00%	36.62 - 41.75% (81.11 - 85.20%)
	Turritopsis sp.	Trinity	-	90327	0.3867	1464	913	~ 82.5 Mb	N/A			B2G	0.7416	48.74% (65.72%)
	Hydra vulgaris	Velvet/Oases and Newbler	24,450 (est.)	48909	-	1145	779	-	Saturation analysis	0.8773		BLASTx and Pfam/Panther	NC (reduced dataset)
	Hydractinia symbiolongicarpus	Cufflinks	-	101518	0.3609	1340	-	-	CEGMA	0.7258	0.9597	B2G and HMM	NC (reduced dataset)
		Trinity	-	127716	0.354	2459	-	-	N/A			B2G and HMM	NC (reduced dataset)
	Podocoryna carnea	Trinity	-	178396	0.386	1977	-	-	N/A			B2G and HMM	NC (reduced dataset)
		Trinity	-	196686	0.3917	1411	-	-	CEGMA	0.9758	0.9798	B2G and HMM	58.5% *
	Millepora alcicornis	Trinity	-	479982	-	749	553	~ 265 Mb	BUSCO (metazoa)	0.491	0.526	B2G	NC (reduced dataset by TPM)
	Craspedacusta sowerbyi	Newbler	-	14081	-	-	-	~4.3 Mb	N/A			BLASTx	0.6732	N/A
Scyphozoan	Aurelia aurita	Trinity	131464	252170	0.3952	1222	715	~ 180.2 Mb	CEGMA	0.9194	0.9476	B2G and Trinotate	NC (reduced dataset by FPKM)
	Chrysora fuscescens [tentacle only]	Trinity	-	30317	0.4042	-	628.7	-	N/A			B2G and InterProScan	0.5583	38.22% (68.45%)
	Stomolophus meleagris [tentacle only]	Trinity	118810	166439	-	2220	1022.95	-	N/A			BLASTx and GOslim	23.3% **	15.80% (77.21%) **
Cubozoan	Chironex fleckeri [tentacle only]	Oases	-	34438	0.3888	-	1056	-	CEGMA	0.7702	0.8065	BLASTx and InterProScan	0.3987	20.93% (52.48%)
	Alatina alata [multiple body parts]	Trinity	84124	126484	0.39	1994	993	~125.6 Mb	CEGMA	0.9758	0.9879	Trinotate	NC (reduced dataset by FPKM)
Anthozoa	Nematostella vectensis	Trinity	-	119911	-	-	-	-	N/A			B2G	0.5157	-
	Anthopleura elegantissima	Trinity	-	142934	-	1505	855	-	CEGMA	98.9% (unspecified)		BLASTx and GO-Uniprot	0.4004	30.72% (76.73%)
	Anthopleura dowii	Trinity	76580	94775	0.4065	1179	707.42	~ 67 Mb	N/A			N/A
	Fungia scutaria	Trinity	-	155914	-	1619	903	-	CEGMA	99.5% (unspecified)		BLASTx and GO-Uniprot	0.3894	29.63% (76.10%)
	Montastraea cavernosa	Trinity	-	200223	-	2192	1038	-	CEGMA	99.5% (unspecified)		BLASTx and GO-Uniprot	0.3875	29.92% (77.24%)
	Seriatopora hystrix	Trinity	-	198572	-	969	671	-	CEGMA	99.5% (unspecified)		BLASTx and GO-Uniprot	0.3045	23.37% (76.76%)
	Aiptasia pallida	Velvet/Oases	-	58018	-	1185	770	~ 47.7 Mb	NC (selected pathways only)			B2G and InterProScan	0.496	25.69% (51.77%)
	Favia sp.	ABySS/CAP3	-	58,848 - 62,469	-	1439 - 1665	-	-	NC (based on Nematostella database)			BLASTp/GO and InterProScan	N/A
	Protopalythoa variabilis	Trinity	126441	276526	-	829	395	~ 109.3 Mb	N/A			BLASTx and GO-Uniprot	42.7% * (out of unique transcripts)
Myxozoa	Kudoa iwatai	Trinity	-	6,538 ***	-	1662	-	-	CEGMA	0.7661	0.8387	Trinotate	NC (reduced dataset)
	Myxobolus cerebralis	Trinity	-	54,927 ***	-	994	-	-	CEGMA	0.3911	0.6613	Trinotate	NC (reduced dataset)
	Polypodium hydriforme	Trinity	-	24,523 ***	-	1475	-	-	CEGMA	0.8991	0.9355	Trinotate	NC (reduced dataset)

## Sheet: Additional File G
Additional File G: BLASTx top-hit species distribution: A) Polyp (pre-filtered), B) Polyp, C) Medusa, D) Cyst. For all stages, a large portion of top BLASTx hits matched Hydra vulgaris sequences, the most prominent hydrozoan system, ranging from approximately 44% to 57% among the three transcriptomes. This was expected as Hydra is the most prominently researched hydrozoan system with a sequenced …
					Also refer to AdditionalFileG_PPT

## Sheet: Additional File H 
	Polyps	Medusa	Cyst
Total # contigs	92659	74639	86373
Successful contigs after Blast	45405	33836	38565
Sucessful contigs after Mapping	36699	25719	29634
Successful contigs after B2G Annotation	31719	21898	25440
Total contigs annotated GO term(s) after B2G and InterProScan	38686	27443	31633
Additional File H: Summary of Blast2GO transcriptome annotation. The Blast2GO pipeline consists of the following three steps: BLASTx, mapping and annotation (GO and InterProScan).

## Sheet: Additional File I
Additional File I: Names of transcripts from Blastx annotation step and corresponding stages they were identified in.
Turritopsis Stage	Transcript name
Polyp	CRE-VHA-12 [Caenorhabditis remanei]
Polyp	PREDICTED: uncharacterized protein K02A2.6-like [Lingula anatina]
Polyp	calcium-activated potassium channel subunit alpha-1-like
Cyst	TBC1 domain family member 22A isoform X2
Polyp	inositol-3-phosphate synthase 1-A-like
Cyst, Polyp	FK506-binding [Bombyx mori]
Cyst	aspartate aminotransferase family partial
Polyp	citrate synthase mitochondrial
Polyp	guanine nucleotide-binding G(i) subunit alpha-like
Polyp	shuttle craft
Medusa, Cyst, Polyp	Vacuolar sorting-associated 37A
Polyp	3-hydroxyanthranilate 3,4-dioxygenase-like
Medusa, Cyst, Polyp	ADP-ribosylation factor 15 isoform X1
Cyst	ethanolamine kinase [Aethina tumida]
Cyst	mitochondrial genome maintenance Mgr2 [Fusarium fujikuroi]
Polyp	breast cancer type 2 susceptibility -like
Polyp	seleno P-like
Medusa, Cyst, Polyp	carbonyl reductase [NADPH] 1-like [Aplysia californica]
Polyp	germinal-center associated nuclear
Polyp	serine threonine tyrosine-interacting 1 isoform X4 [Chlorocebus sabaeus]
Medusa	deoxyribonuclease gamma-like isoform X3 [Xenopus tropicalis]
Cyst	DNA topoisomerase
Medusa, Cyst, Polyp	RNA polymerase II subunit B1 CTD phosphatase RPAP2
Cyst	3-methylcrotonyl- carboxylase
Medusa, Polyp	glycosyl hydrolase
Cyst, Polyp	N-acylethanolamine-hydrolyzing acid amidase
Polyp	delta8 fatty acid desaturase
Medusa, Cyst	Trimeric intracellular cation channel type B-A
Medusa, Cyst	mariner-Tc1 transposon family [Coccidioides posadasii C735 delta SOWgp]
Polyp	l(2)37Cc [Apis mellifera]
Medusa	malate dehydrogenase [Legionella pneumophila]
Medusa, Polyp	RNA-binding 8A
Medusa, Cyst	transcription factor SOX-15 [Trachymyrmex zeteki]
Cyst	guanine nucleotide-binding alpha-3 subunit [Malassezia pachydermatis]
Polyp	RING zinc finger [Plasmodium reichenowi]
Polyp	SH2 domain-containing 1B
Medusa, Polyp	hypothetical protein CGI_10021958
Polyp	Tripeptidyl-peptidase sed3
Medusa	NADH dehydrogenase subunit partial (mitochondrion) [Canis lupus familiaris]
Medusa, Polyp	golgi-associated PDZ and coiled-coil motif-containing isoform X2
Medusa	golgi-associated PDZ and coiled-coil motif-containing isoform X1
Medusa, Cyst	-like [Biomphalaria glabrata]
Medusa	arf-GAP with ANK repeat and PH domain-containing 1 isoform X5
Medusa, Cyst, Polyp	pre-rRNA-processing TSR1 homolog
Medusa, Cyst, Polyp	mitotic spindle-associated MMXD complex subunit MIP18
Polyp	fatty aldehyde dehydrogenase isoform X1 [Gekko japonicus]
Cyst	arf-GAP with ANK repeat and PH domain-containing 1 isoform X2
Medusa, Polyp	AMP-binding [Comamonas testosteroni]
Medusa, Cyst, Polyp	sel-1 homolog 1
Polyp	V-type H+-transporting ATPase subunit I
Polyp	acyltransferase [Aeromonas salmonicida salmonicida]
Polyp	tyrosine- kinase Wsck [Tribolium castaneum]
Medusa, Cyst, Polyp	pleiotropic regulator 1
Cyst	hypothetical protein OCBIM_22008963mg, partial
Cyst	inactive peptidyl-prolyl cis-trans isomerase shutdown-like
Medusa	Suppressor of fused partial
Cyst	hypothetical protein BN871_AB_00880
Cyst	Conserved oligomeric Golgi complex subunit partial
Cyst	AChain Rep1-nxsq Fatty Acid Transporter
Polyp	ABC transporter F family member 3
Cyst	acyl- thioesterase 1 [Homo sapiens]
Polyp	RNA-binding 28
Polyp	glioma tumor suppressor candidate region gene 2 -like
Medusa, Cyst, Polyp	CTTNBP2 N-terminal
Medusa, Cyst, Polyp	RNA-binding 25
Polyp	alkaline B-like [Plutella xylostella]
Medusa	brambleberry-like [Orussus abietinus]
Polyp	deoxyhypusine synthase
Polyp	acetyl- carboxylase alpha
Polyp	opioid-binding cell adhesion partial
Medusa, Cyst, Polyp	BET1 homolog
Medusa, Cyst	dual 3 ,5 -cyclic-AMP and -GMP phosphodiesterase 11 isoform X7 [Nicrophorus vespilloides]
Cyst	41 kDa spicule matrix -like
Medusa, Cyst, Polyp	Immunoglobulin-binding 1
Polyp	coronin-6 isoform X1
Medusa, Polyp	Vacuolar sorting-associated 33A
Cyst	EF-hand calcium-binding domain-containing 2-like
Polyp	prolyl endopeptidase-like
Medusa, Cyst	Vacuolar sorting-associated 33B
Cyst	cytoplasmic FMR1-interacting -like
Polyp	coronin-6 isoform X2
Medusa, Cyst, Polyp	5 -nucleotidase domain-containing 3-like
Polyp	metabotropic glutamate receptor 7 isoform X4
Cyst	folylpolyglutamate mitochondrial isoform X2
Polyp	coronin-6 isoform X6
Medusa	G- coupled partial [Macaca nemestrina]
Medusa, Cyst, Polyp	TGF-beta receptor type-1-like
Medusa	metabotropic glutamate receptor 7 isoform X1
Cyst	homoisocitrate dehydrogenase
Medusa, Polyp	DBF4 homolog A isoform X1 [Callorhinchus milii]
Medusa, Cyst, Polyp	RNA-binding 34
Cyst	glutamine-dependent NAD(+) synthetase with GAT domain-containing [Paraphaeosphaeria sporulosa]
Polyp	fibrillin-1 [Pelodiscus sinensis]
Polyp	GNAT family acetyltransferase
Cyst	hypothetical protein EH28_02767
Polyp	interleukin enhancer-binding factor 2 homolog isoform X1
Cyst	transmembrane 181-like
Medusa, Cyst, Polyp	sphingosine-1-phosphate lyase 1
Medusa	unconventional myosin-Ie isoform X1
Cyst, Polyp	cytochrome P450 CYP44
Medusa, Cyst, Polyp	serine threonine kinase [Acanthamoeba castellanii Neff]
Cyst, Polyp	Glyceraldehyde-3-phosphate dehydrogenase
Polyp	aquaporin isoform X3
Polyp	inorganic phosphate transporter 1-6 [Phytophthora nicotianae]
Medusa, Cyst, Polyp	DNA fragmentation factor subunit alpha
Polyp	aquaporin isoform X2
Medusa	Endonuclease exonuclease phosphatase family
Medusa, Cyst, Polyp	PREDICTED: uncharacterized protein LOC100201344
Medusa, Cyst	PREDICTED: uncharacterized protein LOC100201345
Cyst, Polyp	ras-related C3 botulinum toxin substrate 1-like
Polyp	tripeptidyl peptidase A [Dichomitus squalens LYAD-421 SS1]
Medusa	Discoidin domain-containing receptor 2
Medusa, Cyst, Polyp	PREDICTED: uncharacterized protein LOC107352855
Cyst	40S ribosomal S26E
Medusa, Cyst, Polyp	PREDICTED: uncharacterized protein LOC100215981
Polyp	actin-related 2 3 complex subunit 1A isoform X1 [Xenopus tropicalis]
Medusa, Cyst, Polyp	RNA-binding 48
Cyst	cholinesterase [Capsaspora owczarzaki ATCC 30864]
Medusa, Cyst	Adipolin
Polyp	RNA-binding 45
Cyst, Polyp	serine threonine- kinase PAK mbt
Polyp	nuclear export mediator factor Nemf isoform X1
Medusa, Polyp	RNA-binding 41
Medusa, Cyst, Polyp	RNA-binding 42
Medusa, Cyst, Polyp	run domain Beclin-1 interacting and cysteine-rich containing -like
Medusa, Cyst, Polyp	synaptotagmin-6 isoform X2 [Struthio camelus australis]
Polyp	alpha,alpha-trehalose-phosphate synthase (UDP-forming) variant 3 [Phytophthora parasitica]
Cyst, Polyp	putative uncharacterized protein
Polyp	non-canonical poly(A) RNA polymerase PAPD7 isoform X1 [Rattus norvegicus]
Medusa, Cyst	ss-alanyl conjugating partial
Cyst, Polyp	Histone acetyltransferase type B catalytic subunit
Polyp	PREDICTED: uncharacterized protein LOC107352841
Polyp	40S ribosomal S23 [Phytophthora parasitica]
Cyst	pro convertase subtilisin kexin type 6-like
Polyp	S-Adenosyl homocysteine hydrolase [Chlamydomonas reinhardtii]
Medusa, Cyst	SMG8 isoform X1
Cyst	ribosome biogenesis BMS1 partial
Polyp	meiosis-specific with OB domain-containing isoform X1
Polyp	ras-related Ral-A isoform X2
Cyst	MULTISPECIES: magnesium chelatase [Bacillus]
Polyp	hypothetical protein [Rhodopirellula baltica]
Polyp	PREDICTED: uncharacterized protein LOC107073003
Polyp	mitochondrial NADH ubiquinone oxidoreductase 13kD-like subunit
Medusa, Cyst, Polyp	activating signal cointegrator 1 complex subunit 3- partial
Cyst	PREDICTED: uncharacterized protein LOC106061270
Medusa, Polyp	C-X-C chemokine receptor type 1-like [Hydra vulgaris]
Medusa, Polyp	unnamed protein product [Oikopleura dioica]
Medusa, Polyp	ankyrin repeat-containing [Dictyostelium discoideum AX4]
Cyst	GTPase-activating and VPS9 domain-containing 1 isoform X2
Cyst	three-Cys-motif partner
Polyp	GTPase-activating and VPS9 domain-containing 1 isoform X1
Polyp	RAC [Entamoeba invadens IP1]
Polyp	dnaJ homolog subfamily B member 2 isoform X1 [Lepisosteus oculatus]
Medusa, Cyst, Polyp	PREDICTED: uncharacterized protein LOC107352838
Cyst	microtubule-associated 1A isoform X2 [Equus caballus]
Cyst	OK SW-
Medusa	PREDICTED: uncharacterized protein LOC106903805
Cyst, Polyp	X-box-binding 1-like
Cyst	membrane-associated s in eicosanoid and glutathione metabolism [Phaeoacremonium minimum UCRPA7]
Medusa, Cyst	receptor for egg jelly 4 partial
Polyp	40S ribosomal RPS7
Polyp	partial [Drosophila albomicans]
Polyp	spermatogenesis-associated 4- partial
Cyst	mitochondrial pyruvate dehydrogenase kinase
Medusa, Cyst	AF4 FMR2 family member 4-like isoform X3
Medusa, Cyst, Polyp	sushi domain-containing 2-like
Cyst, Polyp	beta-arrestin-1-like isoform X1 [Lingula anatina]
Polyp	eukaryotic translation initiation factor 1 variant 1 [Taeniopygia guttata]
Medusa, Cyst, Polyp	metabotropic glutamate receptor 3-like
Medusa, Polyp	tubulin-specific chaperone C-like
Polyp	40S ribosomal S8 [Phytophthora parasitica]
Medusa	jmjC domain-containing 7 isoform X1
Cyst	serine threonine kinase [Pseudomonas stutzeri]
Medusa	solute carrier family facilitated glucose transporter member 5 isoform X1 [Oryzias latipes]
Medusa	hypothetical protein NEIPOLOT_01390, partial
Cyst	TRAF and TNF receptor associated [Mus musculus]
Polyp	ubiquitin-conjugating enzyme E2 2-like
Medusa, Cyst, Polyp	Zinc metallo ase nas- partial
Cyst	AFG3 family [Saprolegnia diclina VS20]
Cyst	prominin-1 isoform X1 [Rhinolophus sinicus]
Polyp	nucleoside diphosphate-linked moiety X motif mitochondrial isoform X1 [Xenopus tropicalis]
Medusa, Cyst	arginine-glutamic acid dipeptide repeats
Medusa, Cyst, Polyp	Hsp70-binding 1
Medusa, Polyp	histidine ammonia-lyase isoform X3
Medusa, Cyst, Polyp	Ribonuclease H partial [Metarhizium majus ARSEF 297]
Medusa, Cyst, Polyp	peroxisome biogenesis factor 10
Polyp	Wnt signaling ligand [Ciona intestinalis]
Medusa, Cyst, Polyp	replication factor C subunit 5-like
Medusa	zinc finger C2HC domain-containing 1C-like isoform X2
Medusa, Cyst, Polyp	peroxisome biogenesis factor 13
Cyst	Na(+) H(+) exchange regulatory cofactor NHE-RF2-like
Cyst	ABC transporter G family member 25-like
Medusa	sideroflexin- partial
Polyp	nuclear transport factor 2B [Arabidopsis thaliana]
Polyp	cyclopropane-fatty-acyl-phospholipid synthase [Sphaerulina musiva SO2202]
Polyp	cell division cycle partial [Lagenidium LM-2012b]
Medusa, Cyst, Polyp	calcium uptake mitochondrial isoform X4
Medusa, Cyst	calcium uptake mitochondrial isoform X2
Polyp	calcium uptake mitochondrial isoform X3
Cyst	m7 -mRNA partial
Polyp	involved in biosynthesis of mitomycin antibiotics polyketide fumonisin [Chthonomonas calidirosea]
Cyst	tenascin-R-like isoform X2
Medusa, Cyst, Polyp	nuclear polyadenylated RNA-binding 3- partial
Cyst	tyrosine- phosphatase non-receptor type 5-like
Polyp	Histone [Caenorhabditis elegans]
Polyp	Kinesin light chain P46824
Cyst	breast cancer metastasis-suppressor 1 -A-like
Cyst	myb proto-oncogene partial [Nannochloropsis gaditana CCMP526]
Polyp	DPY30 domain-containing 1
Polyp	60S ribosomal L19-2
Polyp	cytochrome P450 3A21-like
Polyp	thioredoxin domain-containing 17-like
Polyp	fibrinogen C domain-containing 1-A-like
Polyp	acyl-coenzyme A thioesterase 11 isoform X2 [Alligator sinensis]
Polyp	cell division cycle partial [Lagenidium LM-2012c]
Polyp	ras GTPase-activating 4-like
Medusa, Cyst	neuronal PAS domain-containing 3 isoform X1
Medusa	Sodium myo-inositol cotransporter
Medusa	neuronal PAS domain-containing 3 isoform X2
Polyp	Thioredoxin reductase mitochondrial
Cyst	phosphatidylinositol 3-kinase regulatory subunit alpha
Polyp	serotonin partial [Macaca mulatta]
Medusa, Cyst, Polyp	calmodulin [Agaricus bisporus bisporus H97]
Medusa, Cyst, Polyp	synaptotagmin-15 isoform X3
Medusa, Cyst, Polyp	Succinate dehydrogenase [ubiquinone] cytochrome b small mitochondrial
Medusa	nuclear receptor-binding isoform X2
Polyp	MON2 partial
Medusa, Cyst, Polyp	Zinc finger CCHC-type and RNA-binding motif-containing 1
Polyp	NF-kappa-B-activating partial
Cyst	Fatty-acid amide hydrolase 1
Medusa, Cyst, Polyp	Bardet-Biedl syndrome 10
Medusa, Cyst, Polyp	Elongation factor mitochondrial
Polyp	serine threonine- kinase tricorner
Cyst	WD repeat-containing 18
Polyp	AFG3 partial
Medusa, Cyst, Polyp	peroxiredoxin 6
Medusa, Polyp	WD repeat-containing 19
Cyst	transmembrane 69-like
Medusa, Cyst, Polyp	peroxiredoxin 4
Medusa	PREDICTED: uncharacterized protein LOC105847487 isoform X2
Medusa	WD repeat-containing 13
Polyp	Transcription factor mitochondrial
Polyp	arylacetamide deacetylase-like 4
Medusa, Cyst, Polyp	WD repeat-containing 11
Polyp	frizzled receptor [Ciona intestinalis]
Medusa, Cyst	pigeon
Cyst	hypothetical protein, variant [Saprolegnia diclina VS20]
Medusa, Cyst, Polyp	PREDICTED: uncharacterized protein LOC101239792
Cyst	alpha-(1,6)-fucosyltransferase [Aedes albopictus]
Cyst	mitotic checkpoint
Medusa, Polyp	juxtaposed with another zinc finger 1
Medusa, Cyst, Polyp	NFATC2-interacting -like
Medusa, Cyst, Polyp	Dnaj [Acanthamoeba polyphaga moumouvirus]
Cyst	transmembrane 39A-like
Polyp	nitrilase homolog 1
Medusa, Cyst	PREDICTED: uncharacterized protein LOC101239796
Medusa	UDP-N-acetylglucosamine--dolichyl-phosphate N-acetylglucosaminephosphotransferase
Medusa, Cyst, Polyp	sorting nexin-13 isoform X2
Polyp	GABA(A) receptor-associated [Rhodotorula toruloides NP11]
Medusa, Cyst, Polyp	Phosphopantothenate--cysteine ligase
Medusa	endoplasmic reticulum aminopeptidase 1 isoform X3 [Tribolium castaneum]
Medusa, Cyst, Polyp	ER membrane complex subunit 6-like
Polyp	hematopoietic prostaglandin D synthase
Cyst	TPA_inf: hypothetical conserved 1030
Medusa, Cyst, Polyp	very early blastula 4 [Strongylocentrotus purpuratus]
Polyp	glycerol kinase-like isoform X1
Medusa	endoglucanase [Metarhizium robertsii ARSEF 23]
Polyp	nucleosome assembly 1-like 1 isoform X3
Medusa, Polyp	ubiquitin carboxyl-terminal hydrolase 47 isoform X2
Polyp	nucleosome assembly 1-like 1 isoform X2
Medusa, Cyst	transcription factor partial
Medusa, Polyp	TBC1 domain family member 1-like
Medusa, Cyst	ubiquitin carboxyl-terminal hydrolase 47 isoform X1
Cyst	hypothetical protein UCRPA7_4524 [Phaeoacremonium minimum UCRPA7]
Cyst	cysteine protease partial [Tritrichomonas foetus]
Polyp	gremlin-1
Medusa, Cyst, Polyp	PREDICTED: uncharacterized protein LOC101239766
Polyp	peptidase C1A family [Dictyostelium discoideum AX4]
Medusa, Cyst, Polyp	huntingtin-interacting 1-related -like
Medusa, Cyst, Polyp	mitochondrial ribosome-associated GTPase 1
Cyst, Polyp	dolichyl pyrophosphate Man9 c2 alpha-1,3-glucosyltransferase-like
Cyst	IST1 [Dictyostelium discoideum AX4]
Polyp	Nhp6ap [Rhizophagus irregularis DAOM 197198w]
Medusa, Polyp	neuroguidin isoform X1
Cyst	Shikimate O-hydroxycinnamoyltransferase
Polyp	WD repeat-containing 38
Medusa, Cyst, Polyp	ABC transporter ATP-binding
Medusa	band 4B isoform X2
Medusa, Cyst, Polyp	UPF0661 TPR repeat-containing -like
Medusa, Cyst, Polyp	glutamate--cysteine ligase regulatory subunit-like
Medusa, Cyst, Polyp	septin-7-like isoform X2
Medusa, Cyst, Polyp	WD repeat-containing 36
Cyst	neuroguidin isoform X2
Cyst, Polyp	septin-7-like isoform X3
Medusa	ecdysis triggering hormone receptor isoform B [Tribolium castaneum]
Cyst	septin-7-like isoform X1
Cyst, Polyp	mitochondrial inner membrane COX18 isoform X1
Medusa	AF312733_1brachyury T ra
Cyst	fibroblast growth factor receptor 2-like isoform X1 [Branchiostoma belcheri]
Polyp	hypothetical protein DAPPUDRAFT_119127
Polyp	inositol 1,4,5-trisphosphate receptor type 1- partial
Polyp	YTH domain-containing 1 [Polistes dominula]
Polyp	Retinal guanylyl cyclase partial
Polyp	aspartate carbamoyltransferase
Cyst	ADP-ribose mitochondrial [Ficedula albicollis]
Medusa, Cyst, Polyp	GRIP1-associated 1 isoform X2
Medusa	PREDICTED: uncharacterized protein LOC101239872, partial
Cyst	bis(5 -nucleosyl)-tetraphosphatase (symmetrical)
Cyst	AAEL010985-PA [Aedes aegypti]
Cyst	AChain Structure Of Human Parp1 Catalytic Domain Bound To A Quinazoline- 4(1h,3h)-dione Inhibitor
Medusa, Cyst, Polyp	WD repeat-containing 27
Polyp	glutathione S-transferase omega-1
Medusa, Cyst, Polyp	vam6 Vps39
Cyst	dedicator of cytokinesis 9-like isoform X6
Medusa, Cyst, Polyp	WD repeat-containing 25
Medusa	Tetratricopeptide repeat
Polyp	WD repeat-containing 26
Medusa, Cyst, Polyp	Coatomer subunit zeta-1
Cyst	RRP5 homolog isoform X2
Polyp	Fruit bromelain
Polyp	WD repeat-containing 24
Medusa, Cyst	charged multivesicular body 7-like
Medusa, Polyp	ninein-like isoform X1 [Crassostrea gigas]
Cyst	stress response NST1- partial
Polyp	carbonic anhydrase 12-like isoform X1 [Octopus bimaculoides]
Medusa	epidermal growth factor receptor kinase substrate 8 isoform X1 [Anser cygnoides domesticus]
Cyst, Polyp	methylmalonate-semialdehyde dehydrogenase [acylating] mitochondrial-like
Cyst	hypothetical protein PBPRB0805
Polyp	60S ribosomal L15 [Macaca nemestrina]
Medusa, Polyp	elongator complex 4-like
Medusa, Polyp	Protection of telomeres 1
Medusa	serine threonine- kinase NIM1 isoform X1 [Aquila chrysaetos canadensis]
Medusa	apoptosis-resistant E3 ubiquitin ligase 1
Medusa	N-acetylmuramoyl-L-alanine amidase [Yersinia enterocolitica]
Medusa, Cyst, Polyp	transcription factor SOX-2
Polyp	kinase C-binding NELL1 isoform X2
Polyp	E3 SUMO- ligase CBX4
Polyp	ARRestin Domain [Caenorhabditis elegans]
Cyst	50s ribosomal
Polyp	FH1 FH2 domain-containing 3-like isoform X2
Medusa, Polyp	DSBA oxidoreductase [Capsaspora owczarzaki ATCC 30864]
Medusa	eukaryotic initiation factor 4A-I isoform X2
Medusa, Cyst, Polyp	UPF0488 CG14286
Medusa, Cyst	X-linked retinitis pigmentosa GTPase regulator
Medusa	zinc finger C4H2 domain-containing isoform X2
Medusa, Cyst, Polyp	RNA-binding 5-like
Polyp	cAMP and cAMP-inhibited cGMP 3 ,5 -cyclic phosphodiesterase 10A
Medusa	SCY1 2
Polyp	short chain [Phytophthora infestans T30-4]
Cyst	leukocyte receptor cluster member 8 [Phytophthora infestans T30-4]
Medusa, Cyst	WD repeat-containing 55-like isoform X1
Cyst	40S ribosomal S2-4
Medusa	tudor domain-containing 15 [Cercocebus atys]
Medusa	paramyosin-like isoform X1 [Crassostrea gigas]
Medusa	retinoblastoma-associated -like isoform X1 [Acropora digitifera]
Cyst, Polyp	glycerophosphodiester phosphodiesterase domain-containing 1-like
Medusa, Cyst	PREDICTED: uncharacterized protein LOC101240747
Cyst	small G signaling modulator partial
Cyst	folliculin-interacting 2 isoform X3
Medusa, Polyp	Phosphatidylinositol 4,5-bisphosphate 5-phosphatase A
Medusa	presenilin-1 isoform X1
Cyst	folliculin-interacting 2 isoform X1
Medusa, Cyst, Polyp	neuronal acetylcholine receptor subunit alpha-7-like
Polyp	14-3-3 gamma-1
Polyp	next to BRCA1 gene 1 -like
Polyp	activating transcription factor of chaperone isoform X2
Medusa, Cyst	aspartyl glutamyl-tRNA amidotransferase subunit A
Medusa, Polyp	regulator of G- signaling 22-like
Medusa	methyltransferase NSUN6 [Ficedula albicollis]
Polyp	nuclear factor interleukin-3-regulated -like
Polyp	ras-related Rab-6A-like isoform X2
Medusa	PREDICTED: uncharacterized protein LOC100198647 isoform X5
Medusa, Cyst, Polyp	tyrosine- phosphatase non-receptor type 11-like
Medusa	SPRY domain-containing SOCS box 4
Polyp	cAMP-dependent kinase type I-beta regulatory subunit isoform X5 [Ovis aries musimon]
Medusa, Polyp	cAMP-dependent kinase type II regulatory subunit isoform X1
Polyp	cAMP-dependent kinase type II regulatory subunit isoform X2
Polyp	plasma membrane calcium-transporting ATPase 4 isoform X1 [Vicugna pacos]
Polyp	fas-binding factor 1 isoform X4 [Mus musculus]
Cyst	phage head-tail family partial
Medusa, Polyp	TBC1 domain family member 31-like
Medusa	PREDICTED: fibrillin-2-like
Polyp	60S ribosomal L11-like
Cyst	histidine--tRNA cytoplasmic isoform X2
Medusa, Cyst, Polyp	AChain Crystal Structure Of Cmet In Complex With Novel Inhibitor
Polyp	EF hand domain containing [Acanthamoeba castellanii Neff]
Polyp	cysteine-rich 2-binding -like
Polyp	EFR3 homolog B-like
Polyp	PREDICTED: uncharacterized protein LOC100634434
Medusa	oxysterol-binding 1-like isoform X2
Polyp	cytochrome b (mitochondrion) [Sipunculus nudus]
Medusa, Cyst, Polyp	oxysterol-binding 1-like isoform X1
Medusa, Cyst, Polyp	cell division cycle 20 homolog
Cyst	ribosomal l28e
Medusa	Beta-1,4-galactosyltransferase 1
Medusa, Cyst, Polyp	Beta-1,4-galactosyltransferase 7
Cyst	phospholipase D1-like isoform X2 [Scleropages formosus]
Polyp	GH21566 [Drosophila grimshawi]
Polyp	aquaporin-1-like [Crassostrea gigas]
Medusa	FAM135A isoform X4
Polyp	senescence-specific cysteine protease SAG39 [Ricinus communis]
Cyst, Polyp	FAM135A isoform X2
Medusa, Polyp	WD repeat and HMG-box DNA-binding 1
Cyst	NADH dehydrogenase subunit 3 (mitochondrion) [Balamuthia mandrillaris]
Polyp	serine arginine repetitive matrix 2-like isoform X1
Medusa, Polyp	fibrocystin-L-like
Cyst, Polyp	charged multivesicular body 1a-like
Polyp	dNA primase
Cyst	slit homolog 3 - partial
Medusa, Cyst, Polyp	Pentatricopeptide repeat domain containing
Polyp	PREDICTED: uncharacterized protein LOC105850459, partial
Polyp	galectin-7- partial
Medusa	pyrrolo-quinoline quinone [Ktedonobacter racemifer]
Medusa	von Willebrand factor A domain-containing 7-like
Medusa, Polyp	phospholipase A2 phaiodactylipin-like [Diachasma alloeum]
Medusa	Glucan endo-1,3-alpha-glucosidase agn1
Medusa, Cyst, Polyp	Signal recognition particle subunit SRP68
Medusa	insulin-like growth factor 1 receptor
Medusa, Polyp	Ras-related Rab-3
Polyp	Polyubiquitin- partial [Schistosoma haematobium]
Polyp	estradiol 17-beta-dehydrogenase partial
Medusa, Cyst	tumor necrosis factor receptor superfamily member 16
Polyp	fibrinogen C domain-containing 1
Medusa	Spermine partial
Polyp	PREDICTED: uncharacterized protein LOC105849635, partial
Polyp	Piso0_002646 [Millerozyma farinosa CBS 7064]
Cyst	tRNA mitochondrial-like
Polyp	Heat shock HSP 90- partial
Medusa, Cyst, Polyp	phosphatase 1B isoform X2
Cyst	hydrolase [Arcobacter LPB0137]
Medusa, Cyst, Polyp	Synaptotagmin- partial
Cyst, Polyp	PREDICTED: uncharacterized protein LOC101239711
Medusa, Cyst, Polyp	hypothetical protein AC249_AIPGENE28543
Cyst	Serine threonine- kinase minibrain
Cyst	bile salt export partial
Medusa	Pao retrotransposon peptidase family [Trichinella spiralis]
Medusa	intermediate filament tail domain-containing 1 isoform X2 [Chrysemys picta bellii]
Medusa	nesprin-1 isoform X1
Cyst	epoxide hydrolase 1 isoform X1 [Xenopus tropicalis]
Medusa, Cyst	nesprin-1 isoform X3
Medusa, Cyst	centromere J isoform X2
Medusa	nesprin-1 isoform X2
Medusa, Cyst, Polyp	PREDICTED: uncharacterized protein LOC101240704
Medusa, Cyst, Polyp	rho GTPase-activating 26 isoform X1
Medusa, Cyst, Polyp	integrator complex subunit 1 isoform X2
Medusa, Cyst	rho GTPase-activating 26 isoform X2
Cyst	tumor necrosis factor receptor superfamily member 27
Medusa, Polyp	Phosphatidylinositide phosphatase SAC2
Cyst	PREDICTED: uncharacterized protein LOC109462922
Medusa, Cyst, Polyp	zyg-11 homolog B
Cyst	translation initiation factor eIF-2B subunit gamma-like
Cyst	double-strand-break repair rad21 [Fusarium fujikuroi]
Cyst	and DDE 1 and HTH Tnp Tc5 domain containin g
Medusa, Polyp	PREDICTED: uncharacterized protein LOC100207073 isoform X2
Medusa, Cyst, Polyp	hydroxyacyl-coenzyme A mitochondrial
Cyst, Polyp	transcription factor -like
Medusa, Cyst, Polyp	PREDICTED: putative uncharacterized protein DDB_G0274535
Polyp	endoglucanase 2-like [Nasonia vitripennis]
Cyst, Polyp	homeobox Meis1-like
Polyp	hypothetical protein EMIHUDRAFT_105379 [Emiliania huxleyi CCMP1516]
Medusa	geranylgeranyl transferase type-2 subunit beta
Cyst, Polyp	ankyrin repeat domain-containing 13D
Polyp	Tau-tubulin kinase 1
Polyp	Proliferating cell nuclear partial
Medusa	heparanase isoform X3
Cyst	serine threonine- kinase H1 [Coturnix japonica]
Polyp	MULTISPECIES: superoxide dismutase [Alcanivorax]
Cyst	muscle calcium channel subunit alpha-1 isoform X1 [Cephus cinctus]
Medusa, Cyst	GRIP and coiled-coil domain-containing 2-like
Polyp	mitoguardin-like isoform X2
Cyst, Polyp	CRE-CHT-1 [Caenorhabditis remanei]
Medusa, Cyst, Polyp	tRNA selenocysteine 1-associated 1 isoform X1
Cyst	PREDICTED: uncharacterized protein LOC109476669 isoform X1
Medusa	hypothetical protein CAPTEDRAFT_209352, partial
Cyst	PREDICTED: uncharacterized protein LOC100372836
Polyp	Carotenoid cleavage dioxygenase chloroplastic
Polyp	Smaug isoform X1 [Stomoxys calcitrans]
Medusa, Cyst, Polyp	Signal recognition particle subunit SRP72
Medusa, Cyst	unconventional myosin-VIIa- partial
Cyst	PREDICTED: uncharacterized protein LOC106868899
Cyst	Trafficking kinesin-binding partial
Polyp	sigma non-opioid intracellular receptor 1
Polyp	keratinocyte-associated 2-like
Polyp	lysosomal-associated transmembrane 4B-like
Medusa, Cyst, Polyp	thymosin beta-12 [Salmo salar]
Medusa, Cyst, Polyp	peroxisomal biogenesis factor 5 isoform X1 [Monodelphis domestica]
Polyp	Methionine--tRNA cytoplasmic
Cyst	TRIO and F-actin-binding
Cyst	E3 ubiquitin- ligase MIB2 isoform X2
Cyst	Ribosomal S6 kinase delta-1
Medusa	pygopus [Trachymyrmex zeteki]
Polyp	thiamine biosynthesis
Medusa, Cyst, Polyp	cell division cycle 27 homolog
Cyst	Lon protease partial
Cyst	domain SNF2 family [Trichinella spiralis]
Medusa, Cyst, Polyp	V-type proton ATPase 21 kDa proteolipid subunit
Medusa, Cyst, Polyp	Histone acetyltransferase KAT6A
Medusa, Cyst, Polyp	Tectonic- partial
Polyp	Splicing arginine serine-rich 4
Medusa	hypothetical protein g.46024, partial
Medusa, Cyst, Polyp	PREDICTED: uncharacterized protein LOC100201311
Medusa, Cyst, Polyp	plasma alpha-L-fucosidase
Medusa	somatostatin receptor type 2-like [Crassostrea gigas]
Cyst, Polyp	40S ribosomal S11-like
Cyst	lipo [Tetrasphaera elongata]
Polyp	elongation factor 1 partial [Beauveria bassiana]
Medusa, Cyst, Polyp	PREDICTED: uncharacterized protein LOC100201306
Medusa, Cyst, Polyp	retrovirus-related pol poly from transposon tnt 1-94
Cyst, Polyp	NADP-dependent malic enzyme
Polyp	PREDICTED: uncharacterized protein LOC107352823
Polyp	tubulin alpha-1D chain-like
Medusa	carbohydrate sulfotransferase 8
Cyst	carbohydrate sulfotransferase 6
Medusa, Cyst, Polyp	carbohydrate sulfotransferase 3
Polyp	V-type proton ATPase catalytic subunit A-like
Medusa	fibrocystin-L-like [Xenopus laevis]
Medusa, Polyp	RNA-binding [Coxiella burnetii]
Medusa, Polyp	acid-sensing ion channel 5
Medusa, Cyst	acid-sensing ion channel 4
Medusa, Cyst, Polyp	cyclin-dependent kinase 2-interacting
Medusa	acid-sensing ion channel 3
Medusa	carnitine O-palmitoyltransferase mitochondrial-like isoform X2
Polyp	membrane [Emiliania huxleyi CCMP1516]
Polyp	matrix metallo ase-24-like
Cyst	ribonucleoside-diphosphate reductase subunit alpha
Medusa, Cyst, Polyp	pre-mRNA-splicing factor partial
Cyst	trafficking particle complex subunit 1-like
Medusa, Polyp	thyroid adenoma-associated
Medusa, Cyst, Polyp	calreticulin
Cyst	transposon Tf2-1 poly
Cyst	ribonucleases P MRP subunit POP1-like [Octopus bimaculoides]
Polyp	myb transcription factor
Medusa	solute carrier organic anion transporter family member 4A1-like isoform X2 [Crassostrea gigas]
Medusa, Cyst, Polyp	zinc metallo ase nas-4-like
Polyp	translation initiation factor SUI1
Medusa, Cyst, Polyp	mitogen-activated kinase kinase kinase 4- partial
Polyp	cytochrome oxidase subunit 1 (mitochondrion)
Medusa, Cyst, Polyp	deoxyribodipyrimidine photo-lyase-like isoform X2 [Parasteatoda tepidariorum]
Medusa, Cyst, Polyp	40S ribosomal partial
Cyst	glutamine-synthetase adenylyltransferase
Medusa	receptor-type tyrosine- phosphatase zeta
Polyp	phosphoesterase family [Tetrahymena thermophila SB210]
Polyp	integrin alpha-10
Medusa, Cyst, Polyp	huntingtin
Polyp	anoctamin-4-like isoform X2
Medusa	PREDICTED: uncharacterized protein LOC107352807
Cyst	PREDICTED: uncharacterized protein LOC100199092 isoform X1
Polyp	WH2 motif domain containing [Acanthamoeba castellanii Neff]
Medusa	partial [Ciona intestinalis]
Cyst, Polyp	dnaJ homolog subfamily C member 2 isoform X1
Medusa	guanine nucleotide-binding G(q) subunit alpha isoform X5
Cyst	LOC733730 partial
Polyp	dnaJ homolog subfamily C member 2 isoform X2
Medusa	Sidekick-2 partial
Medusa	guanine nucleotide-binding G(q) subunit alpha isoform X4
Medusa, Cyst, Polyp	guanine nucleotide-binding G(q) subunit alpha isoform X1
Medusa, Cyst, Polyp	myosin heavy clone 203-like
Medusa, Cyst, Polyp	pyrazinamidase nicotinamidase-like
Polyp	phosphatidylcholine transfer -like
Cyst	nedd8-activating enzyme e1 catalytic subunit
Medusa	tubby homolog
Cyst	Zinc RING-type [Penicillium expansum]
Polyp	lissencephaly-1 homolog B
Polyp	annexin B9 isoform X1
Medusa	kinase D-interacting substrate of 220 kDa-like isoform X1 [Pundamilia nyererei]
Medusa, Polyp	DNA repair and recombination partial
Medusa	AAEL014162-PA [Aedes aegypti]
Cyst	conserved oligomeric Golgi complex subunit 1-like
Cyst	cytochrome c oxidase accessory [Arcobacter butzleri]
Polyp	PREDICTED: uncharacterized protein LOC106168035
Cyst	vacuolar atp synthase 16 kda proteolipid subunit [Eutypa lata UCREL1]
Medusa	hypothetical protein BRAFLDRAFT_56774 [Branchiostoma floridae]
Cyst	dna-directed rna polymerase ii subunit rpb7
Cyst, Polyp	serine threonine- kinase MRCK alpha
Polyp	tudor domain-containing 7- partial
Cyst	E3 ubiquitin- ligase HUWE1 isoform X1 [Myotis lucifugus]
Medusa	SH3 domain-containing RING finger 3-like isoform X3
Medusa	DNA gyrase partial [Escherichia coli]
Polyp	TVP38 TMEM64 family
Medusa	CG18508
Medusa	PREDICTED: uncharacterized protein LOC100203927
Medusa, Polyp	solute carrier family 25 member 44-like [Sinocyclocheilus anshuiensis]
Cyst, Polyp	CAD
Polyp	calpain family cysteine protease containing
Polyp	fatty acid desaturase family [Tetrahymena thermophila SB210]
Cyst	nematocyst outer wall antigen precursor [Hydra vulgaris]
Polyp	thiamine transporter SLC35F3 isoform X2
Medusa, Cyst	multiple PDZ domain
Cyst	myotubularin-related 3 isoform X2
Polyp	Glycoside family 25
Cyst	centriolin isoform X3
Polyp	myotubularin-related 3 isoform X3
Polyp	structural maintenance of chromosomes 3 partial
Medusa	Disrupted in renal carcinoma 2-like
Cyst, Polyp	UPF0472 C16orf72-like
Medusa, Cyst	F-actin-capping subunit alpha-2-like
Medusa, Cyst, Polyp	PREDICTED: uncharacterized protein LOC100203959
Medusa	tumor necrosis factor receptor superfamily member 6B
Medusa, Polyp	villin-1 [Salpingoeca rosetta]
Polyp	IMPACT isoform X1
Medusa, Cyst	IMPACT isoform X2
Polyp	intraflagellar transport 43 homolog isoform X1
Medusa	AAEL014636-PA [Aedes aegypti]
Cyst, Polyp	elongation factor Tu GTP binding domain-containing
Medusa, Cyst	PREDICTED: uncharacterized protein LOC100203952
Polyp	tyrosinase [Rubrobacter xylanophilus]
Cyst	E3 ubiquitin- ligase RFWD2-like
Medusa, Polyp	PREDICTED: uncharacterized protein LOC100203948
Polyp	multiple epidermal growth factor-like domains 11 isoform X2 [Heterocephalus glaber]
Medusa, Cyst, Polyp	matrix metallo ase-14-like
Cyst, Polyp	Adipocyte plasma membrane-associated
Polyp	cytoplasmic antigen 1
Medusa	BTB POZ domain-containing adapter for CUL3-mediated degradation 3-like [Biomphalaria glabrata]
Medusa	PREDICTED: uncharacterized protein LOC106638561
Cyst	phenylalanine--tRNA ligase subunit beta [Aggregatibacter actinomycetemcomitans]
Cyst	transcription elongation factor A 2-like
Medusa, Cyst, Polyp	hepatocyte growth factor-regulated tyrosine kinase substrate isoform X2
Medusa, Cyst	alpha-2-macroglobulin-like isoform X1 [Priapulus caudatus]
Medusa, Cyst	focal adhesion kinase 1 isoform X1 [Rhagoletis zephyria]
Polyp	hypothetical protein BN871_AB_00790
Cyst	Zinc finger 106
Cyst	nuclear factor of activated T-cells 5 isoform X3
Cyst	FAM220A isoform X1 [Monodelphis domestica]
Polyp	S-adenosylhomocysteine hydrolase
Polyp	probable ubiquitin carboxyl-terminal hydrolase FAF-X [Orussus abietinus]
Cyst	related to component of actin cortical patches las17
Medusa	acyl- dehydrogenase family member 10 isoform X1 [Chinchilla lanigera]
Polyp	reverse transcriptase ribonuclease H
Cyst	charged multivesicular body 2a-like
Polyp	cullin family partial
Polyp	Raslike [Acanthamoeba castellanii Neff]
Medusa	G1 S-specific cyclin-E1
Cyst	Transcriptional adapter 2-alpha
Medusa, Polyp	transcription factor AP-2 beta [Trichinella spiralis]
Medusa, Cyst, Polyp	Phosphatidylinositol glycan anchor biosynthesis class U
Polyp	Metallo-dependent phosphatase [Wallemia mellicola CBS ]
Cyst	ankyrin repeat domain-containing 34B-like [Crassostrea gigas]
Cyst	myosin heavy fast skeletal muscle-like
Medusa	low-density lipo receptor
Medusa, Cyst, Polyp	C2H2 zinc finger
Cyst	nuclear receptor corepressor 2 isoform X26
Cyst	condensin complex subunit [Phytophthora infestans T30-4]
Cyst	la homolog
Medusa, Polyp	Sperm receptor for egg jelly
Medusa, Cyst, Polyp	Coiled-coil domain-containing 92
Cyst, Polyp	tRNA-specific adenosine deaminase 1 isoform X1
Medusa, Cyst, Polyp	E3 ubiquitin- ligase CHIP-like [Biomphalaria glabrata]
Medusa, Cyst, Polyp	Coiled-coil domain-containing 93
Cyst	tRNA-specific adenosine deaminase 1 isoform X2
Medusa, Cyst, Polyp	Coiled-coil domain-containing 96
Cyst	glutathione S-transferase C-terminal domain-containing isoform X2
Medusa	Coiled-coil domain-containing 97
Cyst	zinc finger Ran-binding domain-containing 2 isoform X2
Polyp	zinc finger Ran-binding domain-containing 2 isoform X1
Polyp	aggrecan core
Polyp	rRNA promoter binding [Rattus norvegicus]
Medusa	Radial spoke head 10-like B
Cyst	hypothetical protein DLAC_07532
Cyst	prolyl 4-hydroxylase
Cyst, Polyp	3-hydroxyisobutyrate mitochondrial
Medusa	rho-related GTP-binding [Tupaia chinensis]
Medusa, Polyp	glutathione S-transferase C-terminal domain-containing isoform X1
Medusa, Cyst	rab3 GTPase-activating catalytic subunit
Medusa	phytanoyl- dioxygenase domain-containing 1 isoform X1
Polyp	AT hook containing transcription factor isoform CRA_c
Medusa, Cyst	PREDICTED: uncharacterized protein LOC105847333, partial
Cyst, Polyp	GTP-binding YPT6 [Ogataea parapolymorpha DL-1]
Cyst	N(4)-(Beta-N-acetylglucosaminyl)-L-asparaginase isoform X1 [Fopius arisanus]
Polyp	calcium calmodulin-dependent kinase type 1B-like
Medusa	equilibrative nucleoside transporter 1 [Chrysemys picta bellii]
Cyst	hypothetical protein GLOINDRAFT_9459
Medusa, Cyst	Retrovirus-related Pol poly from type-1 retrotransposable element R2
Cyst	adenylosuccinate synthase [Pseudomonas stutzeri]
Cyst, Polyp	sushi domain (scr repeat) domain-containing
Cyst, Polyp	phytanoyl- dioxygenase domain-containing 1 isoform X2
Polyp	Beta- [Theobroma cacao]
Cyst	programmed cell death 6 isoform X2
Polyp	synaptic ras GTPase activating [Ixodes scapularis]
Polyp	snRNA-activating complex subunit 3-like
Medusa	WD repeat-containing 90-like
Medusa, Polyp	cadmium zinc-transporting ATPase HMA2-like [Phoenix dactylifera]
Medusa, Cyst, Polyp	retinol dehydrogenase 14
Medusa, Cyst	Low choriolytic enzyme
Medusa, Cyst	ABHD18 isoform X1
Polyp	E3 UFM1- ligase 1-like
Medusa	50 kDa hatching enzyme
Cyst, Polyp	RNA-binding MEX3B
Medusa, Cyst, Polyp	G2 M phase-specific E3 ubiquitin- ligase- partial
Medusa, Polyp	ATP-binding cassette sub-family A member 2-like
Cyst	heterogeneous nuclear ribonucleo K-like
Medusa, Cyst	cytochrome b561 [Microcebus murinus]
Medusa, Cyst	atrial natriuretic peptide receptor 2 isoform X5 [Homo sapiens]
Medusa	FAS-associated death domain
Cyst, Polyp	ankyrin-3-like [Biomphalaria glabrata]
Polyp	WD-40 repeat
Medusa	cys-loop ligand gated ion channel subunit [Schistosoma mansoni]
Cyst	helix-turn-helix domain-containing [Alteromonas mediterranea]
Medusa, Cyst, Polyp	N-lysine methyltransferase SETD8-A isoform X2 [Cimex lectularius]
Medusa, Cyst, Polyp	O-acetyl-ADP-ribose deacetylase 1
Medusa, Cyst, Polyp	serine threonine- phosphatase 2A 65 kDa regulatory subunit A alpha isoform
Medusa	ankyrin repeat domain-containing 13D isoform X3
Medusa, Cyst, Polyp	PREDICTED: uncharacterized protein LOC107339777
Cyst	c-PI de-N-acetylase
Cyst, Polyp	ankyrin repeat domain-containing 13D isoform X2
Polyp	cytochrome P450 6j1-like isoform X1 [Cimex lectularius]
Polyp	eukaryotic translation initiation factor X-chromosomal
Polyp	poly(rC)-binding 1-like
Cyst	hemolysin-III family
Polyp	major facilitator superfamily domain-containing 4-like
Medusa	Manganese-transporting ATPase 13A1
Polyp	60 kDa heat shock mitochondrial- partial
Medusa, Cyst, Polyp	RRP12
Polyp	ubiquitin domain-containing 1-like [Lingula anatina]
Medusa, Cyst, Polyp	RRP15
Medusa, Cyst, Polyp	non-specific lipid-transfer
Polyp	serine threonine- kinase Nek7 isoform X1 [Sturnus vulgaris]
Polyp	vesicular GABA transporter-like
Medusa, Cyst	Receptor-type tyrosine- phosphatase delta
Medusa, Cyst, Polyp	Aggrecan core
Cyst, Polyp	HBS1 partial
Medusa	complement component 1 Q subcomponent-binding partial
Polyp	profilin 1 [Arabidopsis thaliana]
Medusa, Cyst, Polyp	cytosolic 10-formyltetrahydrofolate dehydrogenase [Lepisosteus oculatus]
Medusa, Cyst	YY1-associated factor 2
Medusa	aquaporin-9 isoform X1 [Scleropages formosus]
Cyst, Polyp	NADH-cytochrome b5 reductase
Polyp	vacuolar proton pump D subunit [Thalassiosira pseudonana CCMP1335]
Polyp	centrosomal POC5
Polyp	tetratricopeptide repeat 21B
Medusa, Cyst, Polyp	Calcineurin subunit B type 1
Medusa, Cyst, Polyp	PAX-interacting 1
Polyp	cell wall-associated hydrolase [Clostridium difficile DA00165]
Cyst, Polyp	integrin alpha-V-like
Medusa, Polyp	probable iron ascorbate oxidoreductase DDB_G0283291
Polyp	cytochrome b5-related
Polyp	peptidase [Nonlabens YIK11]
Medusa, Cyst, Polyp	rho GTPase-activating 39-like
Polyp	carcinoembryonic antigen-related cell adhesion molecule 5-like isoform X2
Polyp	HIRA- partial
Polyp	protoporphyrinogen oxidase-like isoform X2 [Lingula anatina]
Polyp	GMP reductase 1
Medusa, Cyst, Polyp	axin dorsalization-associated isoform X1
Cyst	MAGUK p55 subfamily member 5-like
Polyp	axin dorsalization-associated isoform X2
Polyp	rasGAP-activating 1 isoform X3
Cyst	PREDICTED: uncharacterized protein LOC100201493
Cyst, Polyp	glutathione S-transferase TCHQD-like isoform X1 [Eucalyptus grandis]
Polyp	hypothetical protein AC249_AIPGENE2972
Medusa, Polyp	Scavenger receptor class B member 1
Cyst	sine oculis-like transcription factor
Polyp	carbonic anhydrase [Pantoea agglomerans]
Medusa	PREDICTED: uncharacterized protein LOC107327772
Cyst, Polyp	thymocyte nuclear 1 isoform X1
Medusa	malonyl- mitochondrial
Medusa, Cyst, Polyp	transposase [Bombyx mandarina]
Medusa, Cyst, Polyp	PREDICTED: uncharacterized protein LOC101237076
Polyp	Peroxidase mlt- partial
Medusa	Phosphatidylinositol-4-phosphate 5-kinase 1
Cyst	neuroblast differentiation-associated AHNAK
Polyp	D(1) dopamine receptor-like
Medusa, Cyst, Polyp	PCI domain-containing 2
Polyp	Ubiquitin-related modifier 1
Polyp	hypothetical protein [Frigoribacterium sp. Leaf186]
Medusa, Polyp	Migration and invasion-inhibitory
Cyst, Polyp	mitochondrial ribosome-associated GTPase 2-like
Polyp	heat shock 70kDa 1 8
Polyp	pleckstrin homology domain-containing family M member 3 [Larimichthys crocea]
Polyp	CAP-Gly domain-containing linker 4 isoform X1 [Thamnophis sirtalis]
Cyst	zinc finger GLI2-like
Polyp	dihydrodipicolinate reductase
Polyp	PREDICTED: uncharacterized protein LOC101237041
Cyst	PREDICTED: uncharacterized protein LOC108677961
Medusa, Cyst	nucleolar MIF4G domain-containing 1- partial
Medusa, Polyp	nodal-related protein
Cyst	PREDICTED: uncharacterized protein LOC101237045
Medusa, Cyst, Polyp	Hemicentin-1
Medusa	Hemicentin-2
Polyp	eukaroytic elongation factor 2 kinase [Cordyceps militaris CM01]
Medusa, Cyst, Polyp	rho guanine nucleotide exchange factor 11-like
Polyp	rab 3
Polyp	tyrosine- phosphatase non-receptor type 23 isoform X2
Polyp	tenascin-N isoform X2
Polyp	costars family ABRACL
Cyst	tensin-3 isoform X1 [Miniopterus natalensis]
Polyp	small G- Ras2
Cyst	hypothetical protein HELRODRAFT_184583, partial [Helobdella robusta]
Cyst	Protein CBG19858
Medusa, Cyst, Polyp	BUB3-interacting and GLEBS motif-containing ZNF207-like isoform X2
Medusa, Cyst, Polyp	rab 6
Medusa, Cyst, Polyp	prostaglandin G H synthase 2-like isoform X3 [Crassostrea gigas]
Polyp	prolyl-tRNA synthetase associated domain-containing 1-like
Polyp	transcriptional regulator cold shock DNA-binding
Cyst	Thioredoxin domain-containing
Polyp	TPR domain-containing [Dokdonia 4H-3-7-5]
Medusa, Cyst, Polyp	Vacuolar -sorting-associated 25
Medusa, Cyst, Polyp	FAM91A1
Medusa, Polyp	PREDICTED: uncharacterized protein LOC100634493
Polyp	doublecortin domain-containing 2-like
Medusa, Polyp	N-alpha-acetyltransferase 10-like
Cyst, Polyp	eukaryotic translation initiation factor 2-alpha kinase 3-like
Medusa, Cyst	GTP cyclohydrolase 1 feedback regulatory
Medusa, Cyst, Polyp	chromodomain-helicase-DNA-binding 1-like
Cyst	ubiquitin C [Schistosoma japonicum]
Cyst	vacuolar ATP synthase proteolipid subunit 2 [Purpureocillium lilacinum]
Medusa	hypothetical protein EAI_10824, partial
Cyst	N-(5-amino-5-carboxypentanoyl)-L-cysteinyl-D-valine synthase [Magnaporthe oryzae 70-15]
Medusa, Cyst	ATP-binding cassette sub-family A member 5-like [Anoplophora glabripennis]
Medusa	probable ubiquitin carboxyl-terminal hydrolase FAF-X [Halyomorpha halys]
Polyp	PREDICTED: uncharacterized protein LOC101239110, partial
Medusa	Usher syndrome type-1G homolog isoform X1 [Lates calcarifer]
Polyp	ras family GTPase [Emiliania huxleyi CCMP1516]
Medusa, Cyst, Polyp	GPI ethanolamine phosphate transferase 1
Cyst	PREDICTED: uncharacterized protein LOC101239682
Polyp	GPI ethanolamine phosphate transferase 2
Medusa, Cyst, Polyp	GPI ethanolamine phosphate transferase 3
Medusa	retinal dehydrogenase 2 isoform X3 [Nannospalax galili]
Cyst	Alanine--glyoxylate aminotransferase 1 [Phytophthora nicotianae]
Medusa, Polyp	poly adp-ribose polymerase member 14
Cyst	TCCD-inducible-PARP-like domain-containing [Naegleria gruberi]
Medusa, Polyp	fibroblast growth factor receptor 3
Medusa	brahma partial [Anopheles gambiae S]
Cyst	diacylglycerol acyltransferase [Rattus norvegicus]
Cyst	mitochondrial 37s ribosomal mrp2 [Eutypa lata UCREL1]
Polyp	high choriolytic enzyme 2-like
Medusa, Cyst, Polyp	sorting nexin-27-like
Cyst	PREDICTED: uncharacterized protein LOC108362155
Medusa, Cyst, Polyp	GTP-binding partial
Polyp	importin subunit beta-1
Medusa, Cyst, Polyp	MAM and LDL-receptor class A domain-containing 2-like
Medusa	latrophilin LAT-2
Medusa, Cyst	insulin receptor substrate-related [Hydra vulgaris]
Medusa, Cyst, Polyp	AFG3 2
Polyp	Hepatic leukemia partial
Medusa, Cyst, Polyp	Cytochrome c oxidase subunit mitochondrial
Cyst, Polyp	homeobox ARX
Polyp	hypothetical protein AC249_AIPGENE2925
Medusa	ATP-dependent protease ATP-binding partial [Lactobacillus helveticus]
Medusa	large proline-rich BAG6 isoform X5
Medusa, Cyst, Polyp	collagen type IV alpha-3-binding -like
Cyst	large proline-rich BAG6 isoform X6
Polyp	PREDICTED: uncharacterized protein LOC101240683
Polyp	autophagy-related 18d-like [Beta vulgaris vulgaris]
Polyp	MICAL 1
Polyp	MICAL 2
Polyp	heparan sulfate glucosamine 3-O-sulfotransferase 3B1
Medusa	calmodulin variant 1 [Taeniopygia guttata]
Cyst	feS assembly ATPase [Alteromonas macleodii]
Medusa, Cyst, Polyp	ceramide glucosyltransferase
Medusa, Cyst, Polyp	UPF0686 C11orf1 homolog
Polyp	zinc finger RNA-binding
Medusa, Polyp	CUE domain-containing 1
Polyp	40S ribosomal S12 [Salmo salar]
Polyp	WD40 repeat-containing [Microcoleus PCC 7113]
Medusa, Polyp	Helix-loop-helix 11 [Caenorhabditis elegans]
Cyst	TNF receptor-associated factor 3 isoform X1 [Alligator mississippiensis]
Polyp	14-3-3 partial
Polyp	tensin-3
Medusa	Src kinase-associated phospho 2
Medusa, Cyst, Polyp	guanosine-3 ,5 -bis(diphosphate) 3 -pyrophosphohydrolase MESH1
Medusa, Cyst, Polyp	PREDICTED: uncharacterized protein KIAA0556-like
Polyp	GH11804 [Drosophila grimshawi]
Polyp	AGAP011532-PA [Anopheles gambiae PEST]
Cyst	carnitine O-acetyltransferase-like isoform X2 [Athalia rosae]
Medusa, Cyst, Polyp	oxidoreductase [Microbacterium testaceum]
Cyst	soluble calcium-activated nucleotidase
Polyp	croquemort-like [Megachile rotundata]
Medusa, Polyp	cyclin-I isoform X1 [Ceratotherium simum simum]
Medusa	TGF-beta-activated kinase 1 and MAP3K7-binding partial
Cyst	cleavage stimulation factor subunit 1 isoform X1 [Rattus norvegicus]
Medusa, Cyst	U4 U6 small nuclear ribonucleo Prp3-like
Cyst	hypothetical protein IscW_ISCW014568 [Ixodes scapularis]
Polyp	ETS domain-containing Elk-1-like
Medusa, Cyst, Polyp	glycerol-3-phosphate dehydrogenase [NAD(+)] cytoplasmic
Cyst	orexin receptor type 2-like [Apis cerana]
Medusa	cationic amino acid transporter 3 isoform X1 [Bos taurus]
Medusa	PREDICTED: uncharacterized protein LOC105844975
Medusa, Polyp	Dolichyl-phosphate beta- partial
Polyp	50S ribosomal subunit L3 [Vibrio crassostreae]
Medusa	GDP-perosamine synthase
Polyp	DEAD box ATP-dependent RNA helicase
Medusa	laminin subunit alpha-4- partial
Cyst, Polyp	elongation factor 1 partial
Medusa, Cyst, Polyp	DNA-binding SMUBP-2
Cyst	Alpha N-terminal methyltransferase 1
Cyst	histone acetyltransferase partial
Medusa, Cyst, Polyp	coiled-coil domain-containing CG32809-like isoform X2
Cyst	Leucine-rich repeat partial
Polyp	PREDICTED: uncharacterized protein LOC107344597 isoform X1 [Acropora digitifera]
Medusa	neuronal pentraxin-1-like [Sinocyclocheilus grahami]
Medusa, Cyst	60S ribosomal L15 [Chrysemys picta bellii]
Cyst	cobalamine biosynthesis
Medusa, Cyst, Polyp	phosphatidylinositol transfer beta isoform isoform X1 [Musca domestica]
Cyst	oxidoreductase family
Cyst	G- coupled receptor family C group 6 member A-like [Xenopus laevis]
Medusa, Cyst, Polyp	tick partial
Medusa	L-fucose partial
Medusa	voltage-dependent T-type calcium channel subunit alpha-1H- partial
Cyst	kinesin KIF13B isoform X1 [Haplochromis burtoni]
Medusa, Cyst, Polyp	PREDICTED: uncharacterized protein LOC101240632
Cyst	coiled-coil domain-containing CG32809-like isoform X1
Medusa, Cyst, Polyp	isochorismatase domain-containing mitochondrial-like
Polyp	N-terminal Xaa-Pro-Lys N-methyltransferase 1 [Oreochromis niloticus]
Medusa, Cyst, Polyp	kinetochore-associated 1
Cyst	nadh-ubiquinone oxidoreductase 21 kda subunit [Eutypa lata UCREL1]
Cyst	frataxin [Necator americanus]
Cyst	LIM domain only 3 [Ictalurus punctatus]
Polyp	Betaine--homocysteine S-methyltransferase 1
Medusa	glucose-6-phosphate 1-dehydrogenase-like
Medusa, Cyst, Polyp	CCAAT enhancer-binding zeta
Polyp	1,3--beta-D-glucan 3-glucanohydrolase [Paenibacillus glucanolyticus]
Medusa, Cyst, Polyp	phosphatidylinositol 3-kinase regulatory subunit alpha-like
Medusa, Cyst, Polyp	basement membrane-specific heparan sulfate proteoglycan core -like isoform X2
Polyp	PREDICTED: putative uncharacterized protein DDB_G0271606 [Acropora digitifera]
Medusa	PREDICTED: uncharacterized protein LOC101240642
Medusa, Cyst, Polyp	cubilin
Medusa, Cyst, Polyp	PREDICTED: uncharacterized protein LOC100199846, partial
Cyst	histone [Fundulus heteroclitus]
Cyst	PREDICTED: uncharacterized protein LOC101239624
Polyp	Glutathione reductase [Candida glabrata]
Polyp	sideroflexin-2 isoform X2 [Poecilia reticulata]
Polyp	synaptosomal-associated 23-like
Medusa	E3 ubiquitin- ligase TRIM9 isoform X2
Medusa, Cyst, Polyp	nucleolar complex 2 homolog
Cyst	DNA damage checkpoint variant [Neurospora crassa OR74A]
Polyp	14-3-3 beta alpha
Medusa, Cyst	dystroglycan isoform X1 [Bombyx mori]
Cyst	ATP synthase subunit alpha domain [Staphylococcus aureus aureus]
Polyp	cytochrome b5 reductase 4
Medusa, Polyp	coiled-coil domain-containing 178-like
Medusa, Cyst	WD repeat-containing 59
Medusa	serine threonine- kinase VRK1
Medusa, Cyst, Polyp	serine threonine- phosphatase 2A 56 kDa regulatory subunit delta isoform
Medusa, Cyst	WD repeat-containing 54
Polyp	40S ribosomal S3-A
Medusa, Cyst, Polyp	AChain Structural Determinants For Improved Thermal Stability Of Designed Ankyrin Repeat s With A Redesigned C- Capping
Polyp	LYSozyme [Caenorhabditis elegans]
Medusa, Polyp	reticulon-1-A-like isoform X4 [Lingula anatina]
Cyst	sphingomyelin phosphodiesterase
Polyp	fibroblast growth factor receptor 4 isoform X1 [Takifugu rubripes]
Polyp	3-hydroxyisobutyrate dehydrogenase
Cyst	carboxyl-terminal processing protease
Polyp	iron-sulfur cluster assembly enzyme mitochondrial
Medusa, Cyst, Polyp	PREDICTED: uncharacterized protein LOC101239631
Medusa, Cyst	Transformation transcription domain-associated
Cyst	hypothetical protein AC249_AIPGENE24318, partial
Polyp	CAP-Gly domain-containing linker 1-like isoform X1 [Crassostrea gigas]
Medusa, Cyst, Polyp	PREDICTED: uncharacterized protein LOC101239633
Medusa, Cyst, Polyp	endoplasmic reticulum aminopeptidase 1-like isoform X2
Polyp	ribosomal S4 [Phytophthora parasitica]
Cyst	Uncharacterized protein CELE_F33H12.6 [Caenorhabditis elegans]
Cyst, Polyp	ankyrin repeat-containing
Medusa	ATP-binding cassette sub-family A member 5-like isoform X2 [Lingula anatina]
Medusa, Polyp	WD repeat-containing 49
Polyp	PREDICTED: uncharacterized protein LOC102805845
Medusa, Cyst	regulating synaptic membrane exocytosis 2- partial
Medusa	WD repeat-containing 47
Medusa, Polyp	WD repeat-containing 48
Medusa, Polyp	caspase-8 isoform X1 [Monodelphis domestica]
Cyst	maltose permease mal61 [Eutypa lata UCREL1]
Cyst	inactive serine protease 35-like
Cyst	oxysterol-binding 1
Polyp	nad dependent epimerase dehydratase [Scedosporium apiospermum]
Cyst	oxysterol-binding 2
Medusa, Cyst, Polyp	intraflagellar transport 140 homolog
Medusa, Cyst, Polyp	WD repeat-containing 43
Medusa, Cyst, Polyp	WD repeat-containing 44
Medusa, Cyst, Polyp	Type I inositol 3,4-bisphosphate 4-phosphatase
Medusa, Cyst, Polyp	WD repeat-containing 41
Cyst	Altered inheritance of mitochondria 6
Medusa, Cyst, Polyp	40S ribosomal S15a [Ovis aries]
Medusa, Cyst, Polyp	WD repeat-containing 70
Medusa	probable ubiquitin carboxyl-terminal hydrolase FAF- partial
Polyp	signal transducer and activator of transcription 1-alpha beta isoform X2
Medusa, Cyst, Polyp	RIB43A-like with coiled-coils 2
Cyst, Polyp	nucleo TPR isoform X2
Medusa, Cyst, Polyp	ubiquitin-like modifier-activating enzyme 6 [Anser cygnoides domesticus]
Medusa, Polyp	CAP-Gly domain-containing linker 1
Polyp	CAP-Gly domain-containing linker 4
Cyst, Polyp	CAP-Gly domain-containing linker 3
Polyp	dnaJ homolog subfamily A member 1- partial
Medusa, Cyst, Polyp	aquaporin-10 [Crassostrea gigas]
Cyst	30S ribosomal S1 [Moritella viscosa]
Medusa, Cyst, Polyp	PREDICTED: uncharacterized protein LOC101239600
Cyst	PREDICTED: uncharacterized protein LOC100888604
Medusa	ras-related Rab-9A
Medusa, Cyst, Polyp	ubiquitin-like modifier-activating enzyme 5
Cyst, Polyp	40S ribosomal [Trypanosoma brucei gambiense DAL972]
Polyp	transcript antisense to ribosomal rna
Medusa	ubiquitin-like modifier-activating enzyme 6
Cyst, Polyp	Kinase D-interacting substrate of 220 kDa
Polyp	ubiquitin-like modifier-activating enzyme 7
Cyst, Polyp	2-oxoisovalerate dehydrogenase subunit mitochondrial-like
Medusa, Cyst, Polyp	apoptosis inhibitor 5 isoform X2
Medusa, Cyst, Polyp	WD repeat-containing 78
Medusa, Cyst, Polyp	RPA-interacting B-like
Polyp	WD repeat-containing 76
Medusa, Cyst, Polyp	ubiquitin-like modifier-activating enzyme 1
Medusa, Polyp	WD repeat-containing 74
Medusa, Cyst, Polyp	WD repeat-containing 75
Medusa, Cyst, Polyp	WD repeat-containing 61
Polyp	PREDICTED: uncharacterized protein LOC106163538 isoform X4
Polyp	PREDICTED: uncharacterized protein LOC106163538 isoform X6
Polyp	trace amine-associated receptor 2 [Macaca mulatta]
Cyst, Polyp	PREDICTED: uncharacterized protein LOC101235124 isoform X2
Medusa	cold-inducible RNA-binding B-like isoform X4 [Salmo salar]
Polyp	meiosis arrest female 1- partial
Medusa, Cyst, Polyp	brain-specific angiogenesis inhibitor 3- partial
Medusa, Cyst, Polyp	subfamily B member partial
Medusa, Cyst, Polyp	endothelin-converting enzyme 1-like
Polyp	tRNA wybutosine-synthesizing 1 partial
Medusa, Cyst, Polyp	ras-related Rab-8A
Polyp	microcephalin [Poecilia formosa]
Medusa, Cyst, Polyp	ras-related Rab-8B
Cyst, Polyp	ras-related Rab-7a
Cyst	calretinin isoform X1
Medusa, Cyst, Polyp	doublesex- and mab-3-related transcription factor A2-like isoform X1 [Acropora digitifera]
Polyp	calretinin isoform X2
Polyp	hypothetical protein AC249_AIPGENE24088, partial
Medusa, Cyst, Polyp	axonemal dynein light intermediate polypeptide 1
Polyp	elongation factor 1 partial [Pseudoplatystoma corruscans]
Medusa, Cyst, Polyp	OTU domain-containing partial
Polyp	translation initiation factor eIF-2B subunit gamma isoform X1
Medusa, Cyst, Polyp	obg-like ATPase 1
Cyst	ornithine decarboxylase antizyme
Cyst, Polyp	hypothetical protein F443_16787 [Phytophthora parasitica P1569]
Medusa, Polyp	von Hippel-Lindau disease tumor suppressor [Dufourea novaeangliae]
Polyp	WD repeat-containing 66
Polyp	WD repeat-containing 63
Medusa, Cyst	dihydrolipoamide succinyltransferase
Polyp	ganglioside GM2 activator-like [Crassostrea gigas]
Polyp	MULTISPECIES: alkylated DNA repair [Mesorhizobium]
Medusa, Cyst, Polyp	Malonyl- -acyl carrier mitochondrial
Medusa, Cyst, Polyp	WD repeat-containing 92
Cyst	palmitoyl- thioesterase 1
Cyst, Polyp	WD repeat-containing 93
Medusa, Cyst, Polyp	WD repeat-containing 90
Medusa, Cyst, Polyp	biogenesis of lysosome-related organelles complex 1 subunit 5-like
Cyst	hypothetical protein BRAFLDRAFT_128074 [Branchiostoma floridae]
Medusa, Cyst, Polyp	WD repeat-containing 91
Cyst, Polyp	roquin-1 isoform X2
Cyst	zz type zinc finger domain-containing
Medusa, Cyst, Polyp	adenylate cyclase type 3-like
Cyst, Polyp	eukaryotic initiation factor 4A-I-like
Polyp	RNA-binding 24-A-like [Aplysia californica]
Medusa, Polyp	PREDICTED: uncharacterized protein LOC105850639, partial
Polyp	60S ribosomal L29-1-like [Erythranthe guttata]
Polyp	calmodulin-like [Sus scrofa]
Medusa, Polyp	WD repeat-containing 66-like
Medusa, Cyst, Polyp	hormonally up-regulated neu tumor-associated kinase
Medusa, Cyst, Polyp	[Laccaria bicolor S238N-H82]
Polyp	Methylcrotonyl- carboxylase carboxyl transferase subunit [Sporomusa An4]
Medusa, Cyst, Polyp	steryl-sulfatase-like [Cavia porcellus]
Polyp	Pyroglutamyl-peptidase 1
Medusa, Cyst, Polyp	TNF receptor-associated factor 2
Medusa, Cyst, Polyp	TNF receptor-associated factor 3
Cyst	PREDICTED: uncharacterized protein LOC102078173 isoform X1
Polyp	WD repeat-containing 96
Medusa, Cyst, Polyp	fibropellin-1-like isoform X1 [Acropora digitifera]
Medusa	PREDICTED: uncharacterized protein LOC106675450
Medusa, Cyst, Polyp	pseudouridylate synthase 7 homolog
Cyst	chromosome 14 open reading frame isoform CRA_b
Medusa, Cyst	WD repeat-containing 81
Polyp	ATP synthase subunit 6 (mitochondrion) [Nasonia vitripennis]
Medusa, Cyst, Polyp	WD repeat-containing 82
Medusa, Cyst	Cytochrome b561 and DOMON domain-containing
Polyp	titin isoform X47
Cyst, Polyp	disks large homolog 5 isoform X2
Medusa	disks large homolog 5 isoform X4
Medusa	RB1-inducible coiled-coil 1
Polyp	ras-related Rab-6B
Cyst, Polyp	wsc domain-containing
Medusa	Chondroitin proteoglycan 2
Polyp	Guanine nucleotide exchange factor VAV3
Polyp	DNA replication licensing factor MCM7 isoform X2
Cyst, Polyp	WD repeat-containing 89
Cyst	Mal s 1 allergenic partial [Malassezia sympodialis]
Medusa	WD repeat-containing 87
Polyp	VPS10 domain-containing receptor 1
Medusa	VPS10 domain-containing receptor 2
Medusa, Polyp	WD repeat-containing 88
Cyst	adiponectin receptor partial
Polyp	cytochrome c553 [Heterosigma akashiwo]
Medusa	equilibrative nucleoside transporter 1 [Bison bison bison]
Polyp	histone-lysine N-methyltransferase SUV420H1-like
Polyp	guanine nucleotide-binding G(I) G(S) G(T) subunit beta-1 [Papilio machaon]
Cyst	glycolipid 2-alpha-mannosyltransferase
Medusa, Cyst	hypothetical protein AC249_AIPGENE28434
Medusa, Cyst, Polyp	tyrosine- kinase transmembrane receptor Ror2
Medusa	TBATA-like isoform X1 [Lepisosteus oculatus]
Medusa	PREDICTED: uncharacterized protein LOC105849581, partial
Polyp	ras-related Rab-5A
Polyp	ras-related Rab-5C
Medusa, Polyp	Hemicentin 1-like 2
Medusa, Cyst	upstream stimulatory factor 2
Medusa, Polyp	E3 ubiquitin- ligase SH3RF1
Medusa	radial spoke head 6 homolog A-like
Cyst	heparan-sulfate 6-O-sulfotransferase 2-like
Polyp	crumbs isoform X2
Medusa	zinc finger and BTB domain-containing 40 isoform X2
Medusa, Polyp	peptidase S49 [Orientia tsutsugamushi]
Cyst	Negative regulator of the PHO system
Polyp	upstream stimulatory factor 1 isoform X2 [Myotis lucifugus]
Cyst	High-affinity carbon uptake Hat [Crocosphaera watsonii]
Cyst	54s ribosomal l6
Polyp	Inosine-5 -monophosphate dehydrogenase
Medusa	Sodium hydrogen exchanger partial
Cyst	flagellar hook-length control [Arcobacter butzleri]
Polyp	GTP-binding nuclear GSP1 Ran
Polyp	RAC serine threonine- kinase [Tribolium castaneum]
Cyst	N-acetylgalactosamine kinase-like
Polyp	ATP synthase F0F1 subunit partial
Medusa, Cyst, Polyp	ras-related Rab-4B
Polyp	sphingolipid delta(4)-desaturase DES1
Polyp	Sterol regulatory element-binding 1
Polyp	glutathione S-transferase Mu 1-like
Medusa, Polyp	subfamily C member partial
Polyp	ATP GTP binding partial
Medusa	RNA-binding motif X chromosome-like
Cyst, Polyp	spectrin alpha non-erythrocytic 1-like
Medusa, Cyst, Polyp	PREDICTED: uncharacterized protein LOC106076248 isoform X2
Cyst, Polyp	IBR domain-containing [Thecamonas trahens ATCC 50062]
Cyst	phosphoglycerate kinase [Candidatus Kryptonium thompsoni]
Medusa	sperm-associated antigen 1-like
Polyp	ras-related Rab-43
Polyp	cyclic AMP-dependent transcription factor ATF-5
Medusa, Cyst, Polyp	arginine--tRNA cytoplasmic
Polyp	cyclic AMP-dependent transcription factor ATF-4
Cyst	carnosine N-methyltransferase isoform X1
Medusa	carnosine N-methyltransferase isoform X2
Polyp	PREDICTED: uncharacterized protein LOC106076248 isoform X1
Polyp	proline-rich transmembrane 1-like isoform X2
Medusa, Cyst	zinc finger 862- partial
Medusa, Cyst, Polyp	transcription elongation factor B polypeptide 1 isoform X1 [Pongo abelii]
Cyst	tyrosine- kinase transmembrane receptor Ror2 isoform X2
Medusa, Cyst, Polyp	RING finger 113A
Medusa, Cyst, Polyp	transmembrane 110-like
Cyst	diaminobutyrate--2-oxoglutarate transaminase
Cyst	beclin-1 isoform X2
Cyst, Polyp	ras-related Rab-3B
Polyp	hypothetical protein AMTR_s00191p00039450
Cyst	IMP dehydrogenase [Alteromonas mediterranea]
Medusa, Cyst, Polyp	FYVE and coiled-coil domain-containing 1 isoform X2
Polyp	hypothetical protein M427DRAFT_36399
Medusa, Cyst, Polyp	MIP18 family FAM96A
Polyp	ATP synthase beta chain
Medusa, Cyst	thrombospondin-1 isoform X1
Cyst, Polyp	Latrophilin 1
Polyp	COMM domain-containing 9 isoform X2
Medusa	minor histocompatibility HA-1-like isoform X2
Cyst	meiosis-specific with OB domain-containing
Polyp	thioredoxin [Thecamonas trahens ATCC 50062]
Medusa, Cyst, Polyp	crooked neck 1
Polyp	ras-related Rab-30
Polyp	ras-related Rab-31
Cyst	ras-dva small gtpase [Schistosoma mansoni]
Polyp	ras-related Rab-32
Medusa, Cyst	Neuronal acetylcholine receptor subunit alpha-3
Medusa, Polyp	sperm flagellar 2
Polyp	ras-related Rab-35
Cyst	polyisoprenoid-binding [Arcobacter butzleri]
Polyp	Amiloride-sensitive amine oxidase [copper-containing]
Polyp	prasinophyte light harvesting chlorophyll binding [Ostreococcus lucimarinus CCE9901]
Polyp	tripartite motif-containing 16-like isoform X1
Polyp	Neuronal acetylcholine receptor subunit alpha-7
Medusa	USP6 N-terminal isoform X1
Cyst	WD repeat-containing 76-like
Polyp	multidrug resistance-associated 1- partial
Cyst, Polyp	solute carrier family 12 member 2-like
Polyp	40S ribosomal [Eimeria tenella]
Medusa, Polyp	microcephalin isoform X1
Medusa	transmembrane channel 5 [Bos taurus]
Polyp	antibiotic biosynthesis monooxygenase
Polyp	cellular tumor antigen p53-like
Medusa, Cyst, Polyp	PREDICTED: uncharacterized protein LOC107327733
Medusa, Polyp	DNL-type zinc finger -like
Medusa, Polyp	diacylglycerol O-acyltransferase 1
Medusa, Cyst, Polyp	ras-related Rab-21
Polyp	V-type proton ATPase 16 kDa proteolipid subunit [Bactrocera dorsalis]
Medusa	leucine-rich repeat-containing 73 isoform X2
Medusa, Cyst, Polyp	ras-related Rab-23
Medusa, Cyst, Polyp	E3 SUMO- ligase 2-like
Polyp	Histone-lysine N-methyltransferase SUV39H1
Polyp	PREDICTED: uncharacterized protein LOC103311386
Polyp	ras-related Rab-25
Medusa, Cyst	ras-related Rab-26
Medusa, Polyp	Phospholipase DDHD1
Medusa, Cyst, Polyp	Zinc finger C3H1 domain-containing
Cyst	kinesin KIF28P [Aplysia californica]
Polyp	DNA repair REV1 isoform X1
Polyp	Sadenosyl-L-homocysteine [Acanthamoeba castellanii Neff]
Cyst, Polyp	polyubiquitin partial
Medusa	latrophilin-2 isoform X1 [Strongylocentrotus purpuratus]
Polyp	eukaryotic translation initiation factor x-chromosomal
Medusa, Cyst, Polyp	ras-related Rab-1A
Medusa, Cyst, Polyp	importin-11
Medusa, Cyst, Polyp	WD repeat-containing 86-like
Medusa, Polyp	Unconventional myosin-XVIIIa
Medusa, Cyst, Polyp	PREDICTED: uncharacterized protein LOC100201455
Cyst	PREDICTED: uncharacterized protein LOC100201456
Polyp	CG10527-like partial
Medusa, Cyst, Polyp	PREDICTED: uncharacterized protein LOC100201447
Medusa, Cyst, Polyp	TNF receptor-associated factor 6
Cyst, Polyp	myosin heavy chain
Medusa, Cyst, Polyp	TNF receptor-associated factor 4
Medusa	segment polarity dishevelled homolog DVL-3- partial
Medusa, Polyp	ras-related Rab-10
Medusa	ras-related Rab-12
Medusa	ras-related Rab-13
Polyp	ADP-ribosylation factor 3 [Schistosoma japonicum]
Polyp	ras-related Rab-14
Medusa, Cyst, Polyp	ras-related Rab-18
Medusa, Polyp	ubiquitin conjugation factor E4 A isoform X2
Polyp	PEBP [Coccomyxa subellipsoidea C-169]
Medusa, Cyst, Polyp	death-associated 1
Cyst	cyclodehydratase [Variovorax Root411]
Medusa, Polyp	voltage-dependent calcium channel type A subunit alpha-1
Polyp	PREDICTED: protein argonaute-2-like
Polyp	cold inducible RNA binding isoform 3 [Callorhinchus milii]
Medusa, Cyst, Polyp	phosphatidylinositide phosphatase SAC2-like
Medusa	DNA replication factor Dna2
Polyp	serine protease [Cohnella VKM B-2846]
Cyst	phosphoribosylformylglycinamidine synthase [Bombus impatiens]
Polyp	GTPase IMAP family member 7-like
Polyp	rho GDP-dissociation inhibitor 2 [Homo sapiens]
Polyp	MYPT- isoform A [Drosophila melanogaster]
Medusa	histone acetyltransferase type B catalytic subunit-like
Cyst	R3H domain-containing 1-like isoform 2
Polyp	hypothetical protein AC249_AIPGENE16426
Medusa, Polyp	epsin-2 isoform X2
Polyp	disulfide-isomerase A6 isoform X2
Cyst, Polyp	hypothetical protein EMIHUDRAFT_460024 [Emiliania huxleyi CCMP1516]
Polyp	disulfide-isomerase A6 isoform X1
Medusa, Cyst, Polyp	DNA polymerase theta
Cyst	BCL-6 corepressor 1
Cyst	aspartate carbamoyltransferase catalytic subunit
Polyp	venom 164-like
Medusa, Cyst, Polyp	YIF1B-B-like isoform X1 [Limulus polyphemus]
Cyst	60S ribosomal L3-like [Sesamum indicum]
Polyp	hypothetical protein OCBIM_22004484mg, partial
Medusa	solute carrier family 22 member 2-like
Cyst	receptor-type tyrosine- phosphatase F- partial
Medusa, Cyst, Polyp	formate dehydrogenase
Polyp	dual specificity phosphatase 18-like
Medusa	hypothetical protein AC249_AIPGENE16410
Polyp	heparanase-like isoform X1
Cyst, Polyp	heparanase-like isoform X2
Cyst	HAD family hydrolase [Sphingopyxis macrogoltabida]
Medusa, Cyst	band 2 isoform X10
Medusa, Cyst	neuronal pentraxin-2-like
Medusa	1-acyl-sn-glycerol-3-phosphate acyltransferase delta-like
Cyst	contactin-3 [Papio anubis]
Medusa, Cyst, Polyp	breast cancer type 1 susceptibility
Medusa, Cyst, Polyp	probable Bax inhibitor 1
Cyst	Nitrogen assimilation transcription factor nirA
Medusa, Cyst, Polyp	vesicle transport USE1
Medusa, Cyst, Polyp	coiled-coil domain-containing 13-like
Medusa, Cyst, Polyp	U3 small nucleolar ribonucleo IMP3
Medusa, Cyst, Polyp	U3 small nucleolar ribonucleo IMP4
Cyst	nucleosome assembly
Medusa, Cyst, Polyp	L-xylulose reductase
Medusa, Cyst, Polyp	PREDICTED: paramyosin-like
Polyp	subfamily A member partial
Medusa, Cyst, Polyp	Transforming growth factor beta-2
Cyst	BRCT domain-containing At4g02110-like
Medusa, Cyst, Polyp	actin 6A isoform X1
Medusa	trafficking particle complex subunit 8 isoform X2
Medusa	hypothetical protein AC249_AIPGENE25475, partial
Polyp	autophagy-related 18a-like
Polyp	Wnt-11b-like isoform X1 [Coturnix japonica]
Cyst	creatininase [Marinobacter X15-166B]
Medusa, Cyst, Polyp	G1 S-specific cyclin-D2
Polyp	G1 S-specific cyclin-D1
Cyst	ATPase inhibitor mitochondrial-like
Cyst	uncharacterized aarF domain-containing kinase 1-like
Polyp	beta-lactam binding
Medusa, Polyp	importin-9
Polyp	tetratricopeptide repeat 23 isoform X2 [Oryctolagus cuniculus]
Medusa, Cyst, Polyp	cystathionine gamma-lyase
Medusa, Cyst, Polyp	importin-7
Cyst, Polyp	neuralized 4
Polyp	importin-5
Cyst	middle subunit-like
Polyp	splicing factor suppressor of abi3-5 [Arabidopsis thaliana]
Polyp	vacuolar sorting-associated 35-like isoform X1 [Parasteatoda tepidariorum]
Medusa, Cyst	calcium-binding mitochondrial carrier S -3-like
Cyst	coatomer [Phytophthora infestans T30-4]
Cyst	endoglucanase ii
Medusa, Cyst	neurochondrin homolog
Cyst	AGAP008123-PA [Anopheles gambiae PEST]
Medusa, Cyst, Polyp	arginine N-methyltransferase 9
Cyst, Polyp	cation efflux zinc transporter
Cyst	Free methionine-R-sulfoxide reductase [Fusarium fujikuroi]
Polyp	GTPase-activating [Wickerhamomyces ciferrii]
Polyp	partial [Drosophila nigromelanica]
Polyp	DNA-binding RFX6-like
Polyp	hypothetical protein SMAC_01551 [Sordaria macrospora k-hell]
Medusa, Cyst, Polyp	arginine N-methyltransferase 1
Polyp	conserved oligomeric Golgi complex subunit 7-like
Cyst	related to monooxygenase
Medusa, Cyst, Polyp	arginine N-methyltransferase 5
Medusa	tetratricopeptide repeat 30A
Cyst, Polyp	arginine N-methyltransferase 7
Medusa	battenin isoform X2 [Cephus cinctus]
Medusa, Cyst, Polyp	folliculin-interacting 2
Cyst	mRNA cleavage factor I subunit [Fusarium fujikuroi]
Cyst	v-type atpase
Polyp	Jade-1 isoform X1 [Trichechus manatus latirostris]
Medusa, Cyst, Polyp	von Willebrand factor type EGF and pentraxin domain-containing 1- partial
Cyst	CAMK CAMKL kinase [Phytophthora parasitica]
Cyst, Polyp	A-kinase anchor mitochondrial-like isoform X2
Cyst	A-kinase anchor mitochondrial-like isoform X1
Cyst	dolichyl-phosphate beta- partial
Medusa	short transient receptor potential channel 5- partial
Medusa, Cyst, Polyp	60S ribosomal L13a
Cyst	expressed [Oryza sativa Japonica Group]
Medusa	neuropeptide Y receptor isoform X1
Medusa	folliculin-interacting 1
Polyp	PREDICTED: uncharacterized protein LOC107349017
Polyp	Ribosomal Small subunit [Schistosoma japonicum]
Medusa	phenylalanine--tRNA mitochondrial-like
Medusa	is4eu-1 partial
Medusa, Polyp	deoxycytidylate deaminase
Medusa, Cyst	Early endosome antigen 1
Medusa, Polyp	lipase maturation factor 1
Polyp	FAM98B isoform X2
Cyst	persulfide dioxygenase mitochondrial-like [Aedes albopictus]
Medusa	RING finger 32 isoform X1 [Papio anubis]
Medusa	hypothetical protein CAPTEDRAFT_208803
Polyp	apoptosis-inducing factor 3 isoform X2 [Halyomorpha halys]
Polyp	myosin heavy non-muscle-like isoform X1
Polyp	probable quinone oxidoreductase-like
Polyp	tyrosine 3-monooxygenase tryptophan 5-monooxygenase activation beta polypeptide [Schistosoma japonicum]
Polyp	myosin heavy non-muscle-like isoform X2
Medusa	hypothetical protein M513_07267
Medusa, Cyst, Polyp	hypothetical protein AC249_AIPGENE2896
Medusa, Cyst, Polyp	serine threonine- phosphatase 6 catalytic subunit
Polyp	60S ribosomal L13A
Medusa	cell division [Mesorhizobium loti]
Polyp	gamma-secretase subunit Aph-1
Medusa	hypothetical protein g.8453, partial
Polyp	Pyruvate kinase
Polyp	phospholipid scramblase [Phaeodactylum tricornutum CCAP 1055 1]
Medusa, Cyst, Polyp	glutaminyl-peptide cyclotransferase
Medusa	E3 ubiquitin- ligase MARCH2-like [Acropora digitifera]
Medusa, Cyst, Polyp	PREDICTED: uncharacterized protein LOC100213149
Polyp	PREDICTED: uncharacterized protein LOC107339686
Medusa, Polyp	kDa in NOF-FB transposable element
Medusa, Cyst, Polyp	FAM178A-like isoform X3 [Crassostrea gigas]
Cyst, Polyp	abhydrolase domain-containing 2 isoform X1 [Bactrocera cucurbitae]
Medusa, Polyp	RAB6-interacting golgin
Medusa, Polyp	Tigger transposable element-derived partial
Cyst	hypothetical protein PFICI_00573 [Pestalotiopsis fici W106-1]
Medusa, Cyst, Polyp	ubiquitin carboxyl-terminal hydrolase isozyme L5
Cyst	Tyrosine--tRNA partial
Cyst	fungal specific transcription factor domain-containing [Purpureocillium lilacinum]
Polyp	ubiquitin carboxyl-terminal hydrolase isozyme L3
Polyp	DUF567 domain [Stereum hirsutum FP-91666 SS1]
Medusa, Cyst, Polyp	PREDICTED: uncharacterized protein LOC101241271, partial
Polyp	pyridoxine-5 -phosphate oxidase-like
Polyp	sideroflexin-1 isoform X1 [Equus caballus]
Cyst	WD40 repeat-containing [Dictyostelium discoideum AX4]
Polyp	HMG box
Cyst	transmembrane and coiled-coil domain-containing 3-like [Branchiostoma belcheri]
Polyp	fascin- partial
Polyp	polyadenylate-binding 1-like isoform X5
Medusa	Cytoplasmic aconitate hydratase
Medusa, Cyst, Polyp	probable ATP-dependent RNA helicase DDX11
Medusa, Cyst, Polyp	probable ATP-dependent RNA helicase DDX10
Polyp	VPS10 domain-containing receptor 1-like
Polyp	guanine nucleotide binding beta subunit 2 [Agaricus bisporus bisporus H97]
Polyp	Lysophosphatidylcholine acyltransferase 2
Medusa, Cyst, Polyp	tartrate-resistant acid phosphatase type 5-like
Medusa, Cyst, Polyp	60S ribosomal L10a
Medusa	Discoidin domain-containing receptor partial [Trichinella pseudospiralis]
Polyp	unc-13 C
Cyst	AGC kinase [Saprolegnia parasitica CBS ]
Medusa, Cyst, Polyp	probable ATP-dependent RNA helicase DDX17
Polyp	sterile alpha motif domain-containing 14 [Lepisosteus oculatus]
Cyst	glycosyl transferase
Cyst	Rossman fold TIGR00730 family
Medusa, Cyst, Polyp	SPRY domain-containing SOCS box 3-like [Octopus bimaculoides]
Cyst	PREDICTED: uncharacterized protein LOC109087512
Medusa	Zinc finger 277
Cyst	PREDICTED: uncharacterized protein LOC106012455
Medusa, Cyst	Zinc transporter ZIP11
Medusa, Cyst, Polyp	UPF0501 KIAA1430 homolog
Medusa, Cyst, Polyp	Marginal zone B- and B1-cell-specific
Polyp	UDP-glucose:glyco glucosyltransferase 1
Polyp	sperm plasma membrane calcium transporting ATPase isoform X1 [Strongylocentrotus purpuratus]
Medusa, Cyst, Polyp	MOB kinase activator 3A [Larimichthys crocea]
Polyp	GTP cyclohydrolase
Polyp	peptidyl-tRNA hydrolase mitochondrial-like
Cyst	60s ribosomal l27-a
Polyp	transmembrane partial
Medusa, Cyst, Polyp	probable ATP-dependent RNA helicase DDX20
Cyst	F-box LRR-repeat 20-like
Polyp	cystathionine gamma-synthase
Polyp	PREDICTED: uncharacterized protein LOC100201102
Medusa, Cyst	PREDICTED: uncharacterized protein LOC100201104
Cyst	60S ribosomal L10A
Medusa, Cyst, Polyp	probable ATP-dependent RNA helicase DDX28
Medusa, Cyst, Polyp	probable ATP-dependent RNA helicase DDX27
Medusa, Cyst, Polyp	adenylosuccinate synthetase
Medusa	hypothetical protein VMD_37440
Medusa, Cyst, Polyp	probable ATP-dependent RNA helicase DDX23
Medusa	dymeclin [Callorhinchus milii]
Polyp	PREDICTED: uncharacterized protein LOC107339638
Cyst	peroxisomal carnitine O-octanoyltransferase [Larimichthys crocea]
Medusa	ubiquitin carboxyl-terminal hydrolase 24 isoform X3
Medusa	ubiquitin carboxyl-terminal hydrolase 24 isoform X2
Cyst	dual specificity tyrosine-phosphorylation-regulated kinase 4 isoform X4
Cyst	AAEL011784-PA [Aedes aegypti]
Polyp	dual specificity tyrosine-phosphorylation-regulated kinase 4 isoform X3
Medusa	PREDICTED: uncharacterized protein LOC107339630
Cyst	senescence dehydration-associated At3g51250 isoform X1 [Tarenaya hassleriana]
Polyp	ER lumen retaining receptor [Rhodotorula toruloides NP11]
Polyp	Inorganic pyrophosphatase
Medusa, Cyst, Polyp	suppressor of forked
Medusa, Cyst, Polyp	PREDICTED: uncharacterized protein LOC101240599
Cyst	probable ATP-dependent RNA helicase DDX31
Polyp	PREDICTED: uncharacterized protein LOC100201133
Medusa	MMS22-like isoform X1 [Anolis carolinensis]
Polyp	E3 ubiquitin ligase RNF128
Cyst	succinylglutamate desuccinylase [Acanthamoeba castellanii Neff]
Cyst	asparagine synthetase [glutamine-hydrolyzing]-like
Polyp	polyadenylate-binding 1-like isoform X1
Medusa	membrane-spanning 4-domains subfamily A member 4D-like
Polyp	polyadenylate-binding 1-like isoform X2
Medusa, Cyst, Polyp	Fanconi anemia group D2 partial
Polyp	PREDICTED: uncharacterized protein LOC105845390, partial
Medusa, Cyst, Polyp	D-galactoside-specific lectin-like
Cyst	dual specificity tyrosine-phosphorylation-regulated kinase 4 isoform X2
Polyp	hemocytin isoform X4
Medusa	procollagen C-endopeptidase enhancer 1
Medusa, Cyst, Polyp	Tricarboxylate transport mitochondrial
Cyst	SPRY domain-containing SOCS box 1 [Struthio camelus australis]
Medusa	jerky -like
Cyst	clathrin assembly partial
Polyp	aspartic ase-like
Medusa, Cyst, Polyp	probable ATP-dependent RNA helicase DDX43
Polyp	neurogenic locus notch homolog 2-like isoform X9
Medusa	neurogenic locus notch homolog 2-like isoform X8
Medusa	probable tRNA methyltransferase 9
Medusa, Cyst, Polyp	probable ATP-dependent RNA helicase DDX41
Cyst	neurogenic locus notch homolog 2-like isoform X7
Cyst	Interstitial collagenase precursor
Medusa, Cyst, Polyp	Ubox domain containing [Acanthamoeba castellanii Neff]
Polyp	kinase suppressor of Ras 1-like
Polyp	glia maturation factor gamma
Medusa, Cyst, Polyp	Wnt- partial
Medusa, Cyst, Polyp	ribose-phosphate pyrophosphokinase 1 isoform X2
Medusa	fibroblast growth factor receptor 3 [Culex quinquefasciatus]
Cyst	dual specificity tyrosine-phosphorylation-regulated kinase 1A isoform X3
Polyp	sphingolipid delta(4)-desaturase DES1-like
Cyst	tyrosine- phosphatase non-receptor type 9-like isoform X1
Cyst	hypothetical protein Naga_100002g118
Cyst	chromosomal replication initiation
Medusa	EGF-like domain-containing partial
Polyp	High mobility group 20A
Polyp	chitinase B [Listeria fleischmannii FSL S10-1203]
Polyp	high affinity cAMP-specific 3 ,5 -cyclic phosphodiesterase 7A-like isoform X5 [Lingula anatina]
Cyst	glycerophosphodiesterase GDE1 [Capsaspora owczarzaki ATCC 30864]
Polyp	Pre-mRNA-splicing factor partial
Polyp	Cu,Zn superoxide dismutase partial
Cyst	ubiquitin carboxyl-terminal hydrolase 2 isoform X1 [Latimeria chalumnae]
Medusa, Cyst, Polyp	E3 ubiquitin- ligase RNF213- partial
Cyst	D-aspartate oxidase isoform X3 [Haplochromis burtoni]
Polyp	EF-hand calcium-binding domain-containing 5 [Lepisosteus oculatus]
Cyst	hypothetical protein [Arcobacter sp. L]
Cyst	rap1 GTPase-activating 1-like isoform X1 [Aedes albopictus]
Polyp	: glutathione S- pi 1
Medusa, Cyst, Polyp	TNF receptor-associated factor 3-like
Medusa, Cyst, Polyp	EF-hand_1 domain-containing [Charistephane fugiens]
Medusa	PREDICTED: uncharacterized protein LOC105844891
Medusa, Cyst	WD repeat-containing 6-like
Cyst	PREDICTED: uncharacterized protein LOC106158948
Medusa	AAEL004307-PA [Aedes aegypti]
Polyp	endo-beta-1,3-glucanase [Paenibacillus mucilaginosus]
Medusa, Cyst, Polyp	dual specificity tyrosine-phosphorylation-regulated kinase 1A isoform X1
Medusa, Cyst, Polyp	oxysterol-binding -related 11
Medusa, Polyp	histone-lysine N-methyltransferase PRDM9-like [Acropora digitifera]
Medusa, Cyst, Polyp	40S ribosomal S23 [Salmo salar]
Polyp	GM15485 [Drosophila sechellia]
Medusa, Cyst	copine-3- partial
Cyst	dual specificity phosphatase 9 isoform X2 [Macaca nemestrina]
Medusa	Centrosomal of 89 kDa
Cyst	ankyrin repeat domain-containing 17-like
Medusa, Cyst, Polyp	V-type proton ATPase subunit G-like
Polyp	ubiquitin-conjugating enzyme [Trypanosoma cruzi]
Medusa	diacylglycerol kinase delta-like isoform X2
Cyst	acetyl-coenzyme A transporter 1 [Larimichthys crocea]
Cyst	diacylglycerol kinase delta-like isoform X1
Medusa, Cyst	diacylglycerol kinase delta-like isoform X3
Polyp	rho GTPase-activating 39-like isoform X2
Cyst	D-3-phosphoglycerate dehydrogenase [Pseudomonas stutzeri]
Polyp	S-adenosyl-L-homocysteine NAD binding domain
Medusa, Polyp	homologous-pairing 2 homolog
Medusa, Cyst, Polyp	cytidine deaminase
Medusa	unc-45 homolog B [Acromyrmex echinatior]
Cyst, Polyp	PREDICTED: uncharacterized protein LOC101240553
Cyst	kinesin-II 95 kDa subunit-like
Polyp	okadaic acid binding
Polyp	cysteine-rich PDZ-binding
Medusa	ADAMTS-9 A disintegrinand metallo ase with thrombospondin motifs 9
Medusa, Polyp	receptor-type tyrosine- phosphatase delta-like isoform X1 [Hydra vulgaris]
Cyst	Heterogeneous nuclear ribonucleo A2 homolog partial [Schistosoma japonicum]
Medusa, Polyp	Hermansky-Pudlak syndrome 1 partial
Medusa, Cyst, Polyp	BCL-6 corepressor isoform X1 [Peromyscus maniculatus bairdii]
Cyst, Polyp	ORF16-lacZ fusion partial [Escherichia coli DORA_A_5_14_21]
Medusa, Polyp	Beta-1,3-glucosyltransferase
Polyp	alpha-1,6-mannosylglyco 6-beta-N-acetylglucosaminyltransferase A [Bison bison bison]
Medusa, Cyst, Polyp	PREDICTED: uncharacterized protein LOC100181832
Medusa, Cyst, Polyp	galactose-1-phosphate uridylyltransferase isoform X1
Cyst	galactose-1-phosphate uridylyltransferase isoform X2
Medusa	pyruvate dehydrogenase subunit E1 [Yersinia pseudotuberculosis]
Medusa	ankyrin domain
Polyp	flotillin-2 isoform X1
Medusa	fucosyltransferase 8
Polyp	vesicle-associated membrane 7C [Guillardia theta CCMP2712]
Cyst	gamma-tubulin complex component 2-like
Cyst, Polyp	methionine adenosyltransferase
Medusa, Polyp	myosin-9
Polyp	F-box only 8 isoform X1
Cyst, Polyp	ribosomal S29 [Schistosoma japonicum]
Polyp	Armadillo beta-catenin-like repeat
Polyp	Short coiled-coil
Cyst	Uncharacterized protein CELE_Y16E11A.2 [Caenorhabditis elegans]
Polyp	phosphatase 2A regulatory partial
Polyp	KN motif and ankyrin repeat domain-containing 2 [Latimeria chalumnae]
Medusa, Cyst, Polyp	FAM199X isoform X2
Cyst	Sialin
Polyp	synaptotagmin-1-like isoform X1 [Austrofundulus limnaeus]
Medusa, Polyp	PREDICTED: uncharacterized protein LOC101240539
Medusa, Cyst	PREDICTED: uncharacterized protein LOC100201194
Polyp	serine threonine- kinase TAO3-like [Xenopus laevis]
Medusa, Cyst, Polyp	alanine aminotransferase 2-like
Cyst	radixin
Polyp	calsenilin-like isoform X3 [Orussus abietinus]
Medusa	deoxyribonuclease partial
Polyp	otopetrin-2-like isoform X2 [Parasteatoda tepidariorum]
Cyst, Polyp	Queuine tRNA-ribosyltransferase subunit qtrtd1
Polyp	60S ribosomal L19 [Salmo salar]
Medusa	Svil partial
Medusa, Cyst, Polyp	60S ribosomal L18a
Medusa, Cyst, Polyp	2-acylglycerol O-acyltransferase partial
Polyp	heat shock 70 kDa cognate 1-like
Medusa, Polyp	gamma-glutamyltranspeptidase 2-like [Hydra vulgaris]
Medusa, Cyst, Polyp	PREDICTED: protein FAM192A-like
Medusa, Cyst, Polyp	splicing factor 1
Medusa	PEK GCN2 kinase [Aphanomyces invadans]
Polyp	glycosyl transferase [Acidovorax SD340]
Medusa	vacuolar sorting-associated 8 partial
Medusa, Cyst, Polyp	DNA mismatch repair Mlh1 isoform X1
Medusa	exosome component 5 [Taeniopygia guttata]
Cyst, Polyp	Mitochondrial inner membrane protease subunit 2
Medusa, Polyp	FAM220A isoform X1 [Latimeria chalumnae]
Cyst	gamma-tubulin complex component 5 isoform X3
Polyp	phospholipid scramblase 1 isoform X1 [Sarcophilus harrisii]
Medusa, Polyp	Endothelial differentiation-related factor 1
Medusa	protocadherin-9 isoform X2
Polyp	cysteine ase COT44-like
Cyst	iron complex transport system ATP-binding
Polyp	ariadne-2 [Harpegnathos saltator]
Cyst	2Fe-2S iron-sulfur cluster binding domain-containing [Magnaporthe oryzae 70-15]
Polyp	nuclear factor NF-kappa-B p105 subunit
Cyst	WD repeat-containing mio-B [Trachymyrmex zeteki]
Polyp	Chloride intracellular channel exl-1
Cyst, Polyp	60S ribosomal L18A
Medusa, Cyst, Polyp	DNA-directed RNA polymerase I subunit RPA43
Cyst	T-complex 11-like partial
Medusa, Cyst	DNA-directed RNA polymerase I subunit RPA49
Cyst	kelch motif [Tetrahymena thermophila SB210]
Medusa	50S ribosomal L16 [Coxiella burnetii]
Medusa, Cyst, Polyp	T-complex 1 subunit gamma-like
Cyst	nek6 si:ch211- NIMA (never in mitosis gene a)-related kinase partial
Medusa, Cyst, Polyp	PREDICTED: uncharacterized protein LOC101240516
Medusa	uncharacterized MFS-type transporter isoform X2 [Trachymyrmex cornetzi]
Cyst	PR domain zinc finger 15-like
Cyst	isoleucine--tRNA ligase [Arcobacter butzleri]
Medusa, Cyst, Polyp	PREDICTED: uncharacterized protein LOC100213193
Polyp	AAEL012193-PA [Aedes aegypti]
Medusa	von Willebrand factor A domain-containing 2 [Gallus gallus]
Medusa, Cyst, Polyp	tyrosine- kinase Src42A
Cyst, Polyp	PREDICTED: uncharacterized protein LOC105844874
Medusa, Cyst, Polyp	4-trimethylaminobutyraldehyde dehydrogenase
Medusa, Cyst, Polyp	disulfide isomerase-like 2-2
Cyst, Polyp	carboxypeptidase B-like
Cyst	death ligand signal enhancer-like isoform X2
Medusa, Cyst, Polyp	death ligand signal enhancer-like isoform X1
Polyp	disulfide isomerase-like 2-1
Polyp	PREDICTED: uncharacterized protein LOC107352686
Cyst	internalin C [Rhodopirellula europaea]
Polyp	latrophilin Cirl-like isoform X4
Polyp	PREDICTED: uncharacterized protein LOC101239539
Medusa, Cyst, Polyp	PREDICTED: uncharacterized protein LOC105844876
Medusa, Cyst	Alpha- kinase 2
Polyp	Guanylate cyclase soluble subunit alpha-2
Cyst	aquaporin TIP3-1-like [Brassica napus]
Cyst	mrna-capping enzyme subunit beta
Medusa, Polyp	piezo-type mechanosensitive ion channel component 1-like
Cyst	glomulin [Sinocyclocheilus grahami]
Cyst	glycolate oxidase iron-sulfur subunit
Medusa	microtubule-associated serine threonine- kinase 2 isoform X3
Medusa, Polyp	microtubule-associated serine threonine- kinase 2 isoform X2
Medusa, Cyst, Polyp	Transposable element Tcb2 transposase
Polyp	stromal cell-derived factor 2
Medusa, Cyst	fibronectin type III and SPRY domain-containing 1-like
Medusa	M-phase phospho 8 isoform X2 [Maylandia zebra]
Polyp	tripeptidyl-peptidase I [Capsaspora owczarzaki ATCC 30864]
Cyst	peroxisomal membrane PEX14-like
Medusa, Cyst, Polyp	probable serine threonine- kinase pats1
Medusa, Cyst	kinesin light chain [Pyrenophora tritici-repentis Pt-1C-BFP]
Medusa, Cyst, Polyp	sacsin-like [Acropora digitifera]
Medusa, Cyst, Polyp	Transient receptor potential cation channel subfamily M member 6
Medusa, Polyp	Transient receptor potential cation channel subfamily M member 7
Medusa	Transient receptor potential cation channel subfamily M member 8
Medusa	ubiquitin specific [Pediculus humanus corporis]
Cyst	hypothetical protein AURANDRAFT_6078, partial [Aureococcus anophagefferens]
Polyp	downstream neighbor of Son
Medusa, Cyst, Polyp	Transient receptor potential cation channel subfamily M member 1
Cyst	PREDICTED: uncharacterized protein LOC105844938
Polyp	CCR4-NOT transcription complex subunit 2- partial
Medusa, Polyp	ras-related Rab-36- partial
Polyp	monoacylglycerol lipase ABHD6 isoform X1 [Heterocephalus glaber]
Medusa, Cyst	Tetratricopeptide repeat-containing
Cyst	PREDICTED: uncharacterized protein LOC105844933
Medusa, Polyp	PREDICTED: uncharacterized protein LOC101239518
Medusa	phospholipase DDHD2-like
Medusa, Cyst, Polyp	DNA transposase THAP9
Medusa	hypothetical protein BRAFLDRAFT_141444 [Branchiostoma floridae]
Medusa, Cyst, Polyp	octopamine receptor-like [Acropora digitifera]
Polyp	radial spoke head 4 homolog A-like
Medusa, Cyst, Polyp	exosome complex component RRP40-like
Polyp	SNF2 family DNA-dependent ATPase [Gloeophyllum trabeum ATCC 11539]
Polyp	arylsulfatase A
Polyp	inorganic phosphate transporter [Aureococcus anophagefferens]
Polyp	tetratricopeptide repeat 28- partial
Cyst, Polyp	arylsulfatase B
Medusa, Polyp	mitochondrial inner membrane COX18-like
Medusa, Cyst, Polyp	GATS 2
Polyp	PREDICTED: uncharacterized protein LOC100634684
Polyp	GATS 1
Medusa, Cyst, Polyp	dedicator of cytokinesis 7-like
Cyst	GGDEF domain-containing [Arcobacter L]
Medusa, Cyst, Polyp	DNA polymerase partial
Polyp	GATS 3
Medusa, Cyst, Polyp	ubiquitin fubi and ribosomal S30
Polyp	Dipeptidyl peptidase 2
Medusa	Dipeptidyl peptidase 1
Medusa, Cyst, Polyp	Dipeptidyl peptidase 3
Cyst	islet cell autoantigen 1-like isoform X1 [Priapulus caudatus]
Medusa	Poly(ADPribose) polymerase catalytic domain containing [Acanthamoeba castellanii Neff]
Cyst	acyltransferase [Arcobacter butzleri]
Medusa	serine (or cysteine) ase clade B (ovalbumin) partial [Sorangium cellulosum]
Polyp	pro convertase subtilisin kexin type 5 isoform X1
Medusa, Cyst, Polyp	RING-box 1A
Polyp	40S ribosomal S17-like
Cyst	Diphthine methyl ester synthase
Polyp	Dipeptidyl peptidase 9
Medusa, Polyp	glutaredoxin C5orf63 homolog
Polyp	calcium calmodulin-dependent kinase type 1-like [Sinocyclocheilus anshuiensis]
Medusa, Cyst, Polyp	hypothetical protein AC249_AIPGENE16797
Polyp	hypothetical protein ALC62_10770, partial
Medusa, Cyst, Polyp	Tyrosine- kinase Yes
Cyst	MAP microtubule affinity-regulating kinase 3-like isoform X2
Medusa	fructokinase [Galdieria sulphuraria]
Polyp	cyclophilin A
Medusa	mucin-5AC-like isoform X3 [Crassostrea gigas]
Medusa, Cyst, Polyp	inactive hydroxysteroid dehydrogenase 1
Polyp	splicing factor U2af 38 kDa subunit
Medusa, Cyst	PREDICTED: uncharacterized protein LOC105844904
Cyst	serine threonine- kinase endoribonuclease IRE1a-like
Cyst, Polyp	nucleoporin NSP1-like
Polyp	ATPase family AAA domain-containing 1-B-like
Medusa	PREDICTED: uncharacterized protein LOC105844902
Polyp	hypothetical protein BVRB_036970, partial
Medusa, Cyst, Polyp	TPA: cytochrome c oxidase subunit 1 (mitochondrion)
Medusa, Cyst, Polyp	enoyl- hydratase
Cyst	prostaglandin-E(2) 9-reductase-like [Callithrix jacchus]
Polyp	PREDICTED: uncharacterized protein LOC100538256
Medusa, Cyst, Polyp	catechol O-methyltransferase domain-containing 1 isoform X1
Medusa, Cyst, Polyp	catechol O-methyltransferase domain-containing 1 isoform X2
Medusa	fas-binding factor 1 isoform X1 [Mus musculus]
Cyst, Polyp	transmembrane 116-like
Polyp	Cyclin-dependent kinase 8 [Schistosoma haematobium]
Polyp	cyclophilin a
Polyp	alcohol dehydrogenase [NADP(+)] A isoform X2
Medusa	hypothetical protein RP20_CCG007211
Medusa	threonylcarbamoyladenosine tRNA methylthiotransferase [Capra hircus]
Medusa, Polyp	mitofusin-2 isoform X1 [Cricetulus griseus]
Medusa, Cyst	AAEL005140-PA [Aedes aegypti]
Medusa	SH2 domain-containing 5-like
Polyp	RVT 1 and Peptidase A17 and DUF1759 and DUF1758 d omain containing
Polyp	sodium-dependent neutral amino acid transporter B(0)AT3 [Stomoxys calcitrans]
Medusa, Polyp	vomeronasal type-2 receptor 26-like
Medusa, Cyst, Polyp	SCO-spondin- partial
Medusa	L-aspartate oxidase
Medusa, Cyst, Polyp	ATPase family AAA domain-containing 1 [Cricetulus griseus]
Medusa, Cyst, Polyp	rolling stone
Medusa, Polyp	probable phospholipid-transporting ATPase IIB
Medusa, Cyst	SLIT-ROBO Rho GTPase-activating 3-like
Medusa	PREDICTED: uncharacterized protein LOC105850220, partial
Polyp	A disintegrin and metallo ase with thrombospondin motifs 7 isoform X1 [Bactrocera cucurbitae]
Polyp	SGT1 homolog isoform X1
Cyst	SGT1 homolog isoform X2
Cyst	Ubiquitin-like-conjugating enzyme partial
Polyp	group 2 actin [Stylonema alsidii]
Polyp	sodium potassium calcium exchanger Nckx30C isoform X1 [Ceratitis capitata]
Medusa, Cyst, Polyp	mitochondrial import receptor subunit TOM70
Cyst	phosphoacetylglucosamine mutase [Fusarium verticillioides 7600]
Cyst	boule-like isoform X3
Cyst, Polyp	boule-like isoform X2
Polyp	FKBP-type peptidyl-prolyl cis-trans [Phytophthora infestans T30-4]
Medusa, Cyst, Polyp	boule-like isoform X1
Medusa, Cyst, Polyp	eukaryotic translation initiation factor 4 gamma 2-like
Polyp	Multiple inositol polyphosphate phosphatase partial
Cyst	caskin-2-like isoform X1 [Cynoglossus semilaevis]
Cyst	boule-like isoform X6
Medusa	RB1-inducible coiled-coil 1 isoform X1 [Cimex lectularius]
Cyst, Polyp	mannose-binding lectin associated serine protease-1
Medusa, Cyst, Polyp	Dual serine threonine and tyrosine kinase
Medusa, Polyp	PREDICTED: uncharacterized protein LOC105844920
Polyp	adenylate kinase mitochondrial
Polyp	hypothetical protein AC249_AIPGENE14189
Polyp	proliferating cell nuclear antigen-like
Polyp	2-aminomuconate deaminase
Polyp	calreticulin [Anopheles stephensi]
Cyst	cAMP-responsive element modulator isoform X1
Polyp	Wnt-5b-like [Crassostrea gigas]
Polyp	Lysyl oxidase
Polyp	senecionine N-oxygenase [Tribolium castaneum]
Medusa	Anti-sigma factor N-terminal [Pseudobacteroides cellulosolvens ATCC 35603 = DSM 2933]
Medusa, Cyst, Polyp	PREDICTED: uncharacterized protein LOC105844916
Medusa	PREDICTED: uncharacterized protein LOC105844919
Medusa	inositol hexakisphosphate and diphosphoinositol-pentakisphosphate kinase 1 isoform X4
Polyp	coronin-2B-like isoform X2 [Lingula anatina]
Medusa, Cyst, Polyp	probable ATP-dependent RNA helicase DDX49
Medusa, Cyst, Polyp	probable ATP-dependent RNA helicase DDX47
Medusa, Cyst, Polyp	centrosomal of 76 kDa
Cyst	meiotic chromosome segregation [Verticillium dahliae ]
Polyp	MULTISPECIES: serine protease [Mesorhizobium]
Medusa, Cyst, Polyp	probable ATP-dependent RNA helicase DDX46
Polyp	antichymotrypsin-2-like isoform X3 [Amyelois transitella]
Medusa	PREDICTED: fibropellin-1-like
Medusa, Polyp	Sodium-independent sulfate anion transporter
Medusa	coatomer subunit alpha
Medusa	tyrosine phosphatase type IVA 1 [Diachasma alloeum]
Cyst	notum homolog isoform X2 [Callorhinchus milii]
Cyst	RAC-beta serine threonine- kinase-like
Cyst, Polyp	NADPH-dependent diflavin oxidoreductase 1-like
Polyp	homeobox PKNOX1 isoform X1
Medusa	homeobox PKNOX1 isoform X2
Cyst	Tyrosine- phosphatase non-receptor type 23
Cyst	54S ribosomal L3
Medusa, Cyst, Polyp	charged multivesicular body 4b
Polyp	charged multivesicular body 4c
Medusa, Cyst, Polyp	probable ATP-dependent RNA helicase DDX52
Polyp	hypothetical protein AC249_AIPGENE3338, partial
Medusa, Cyst, Polyp	Zinc finger X-linked ZXDB
Cyst	caspase-8 [Corvus cornix cornix]
Medusa, Cyst	probable ATP-dependent RNA helicase DDX59
Medusa, Cyst, Polyp	probable ATP-dependent RNA helicase DDX56
Medusa	phosphatidate phosphatase LPIN3 isoform X1 [Strongylocentrotus purpuratus]
Medusa, Cyst, Polyp	LIM and SH3 domain 1
Polyp	inactive cadmium zinc-transporting ATPase HMA3 isoform X2
Medusa, Cyst	tumor necrosis factor receptor superfamily member 16- partial
Polyp	TBC1 domain family member 1 isoform X1 [Trichogramma pretiosum]
Cyst, Polyp	galaxin-like [Lingula anatina]
Polyp	Sodium calcium exchanger 1
Polyp	Cloroperoxidase [Dichomitus squalens LYAD-421 SS1]
Polyp	cationic amino acid transporter 3-like [Salmo salar]
Medusa	E3 ubiquitin- ligase ZNRF2
Medusa	Protocadherin-11 X-linked
Medusa, Cyst, Polyp	probable ATP-dependent RNA helicase DDX60
Medusa	PREDICTED: uncharacterized protein LOC107327612
Medusa, Polyp	Succinyl- ligase [GDP-forming] subunit mitochondrial
Medusa, Cyst, Polyp	TBC domain-containing kinase
Medusa	NCK-interacting with SH3 domain-like
Polyp	Transcription factor BTF3 4 [Trichinella pseudospiralis]
Cyst	methylglutaconyl- hydratase [Fusarium verticillioides 7600]
Medusa, Cyst, Polyp	dnaJ homolog subfamily B member 13-like
Medusa, Cyst	phosphatidylinositol 4,5-bisphosphate 3-kinase catalytic subunit beta isoform [Callorhinchus milii]
Cyst, Polyp	charged multivesicular body 2a
Polyp	serine threonine- kinase SIK3 isoform X1
Medusa, Cyst	hypothetical protein AC249_AIPGENE28766
Cyst	unclassified (mitochondrion) [Fusarium pseudograminearum CS3427]
Cyst	60S ribosomal partial [Phytophthora heveae]
Cyst, Polyp	LSM14 homolog
Cyst	carbamoyl phosphate synthase large subunit
Polyp	uncharacterized RNA-binding -like isoform X3
Medusa, Cyst, Polyp	E3 ubiquitin- ligase MGRN1-like
Cyst	AGC NDR NDR kinase [Fusarium verticillioides 7600]
Medusa, Cyst, Polyp	regulator of chromosome condensation [Lepisosteus oculatus]
Medusa, Cyst, Polyp	homeotic empty spiracles
Polyp	vinorine synthase-like
Medusa, Polyp	Appr-1-p processing
Polyp	ADP-ribosyl cyclase cyclic ADP-ribose hydrolase 1
Polyp	CIP2A homolog
Medusa, Cyst, Polyp	charged multivesicular body 1a
Cyst	Endoglucanase e-4 precursor
Cyst, Polyp	ferric-chelate reductase 1
Polyp	charged multivesicular body 1b
Medusa	ADP-ribosyl cyclase cyclic ADP-ribose hydrolase 2
Cyst	6-phosphofructo-2-kinase [Eutypa lata UCREL1]
Polyp	Nuclear transcription factor Y subunit gamma
Polyp	ubiquitin c-terminal hydrolase uchl1
Polyp	Lipid Binding
Medusa, Cyst, Polyp	centrosomal of 104 kDa
Medusa	hAT family dimerisation domain containing
Medusa, Cyst, Polyp	nuclear receptor subfamily 2 group F member 1-B-like
Cyst, Polyp	PHD finger 14-like
Polyp	Kinase suppressor of Ras 1
Cyst	guanine nucleotide-binding -like 1
Cyst	guanine nucleotide-binding -like 3
Cyst	chromatin accessibility complex 1
Polyp	GH17732 [Drosophila grimshawi]
Medusa, Cyst, Polyp	interactor for cytohesin exchange factors 1-like isoform X2 [Aplysia californica]
Medusa, Cyst, Polyp	casein kinase II subunit alpha-like
Polyp	Kinase suppressor of Ras 2
Polyp	phosphatidylserine decarboxylase [Neurospora crassa OR74A]
Medusa, Polyp	granulins-like isoform X4
Polyp	granulins-like isoform X3
Cyst	granulins-like isoform X2
Medusa, Cyst, Polyp	lipoxygenase homology domain-containing 1
Polyp	hydantoinase subunit beta [Mesorhizobium LC103]
Cyst	rho GTPase-activating 35
Cyst	Down syndrome cell adhesion molecule Dscam2 isoform X1 [Polistes dominula]
Medusa	Inverted formin-2
Cyst	ZZ-type zinc finger-containing 3 [Clupea harengus]
Cyst, Polyp	cytochrome b ascorbate-dependent 3 [Mesocricetus auratus]
Cyst	Eukaryotic translation initiation factor 2 subunit gamma
Polyp	PREDICTED: uncharacterized protein LOC105565135
Polyp	translation initiation factor sui1
Medusa, Polyp	PCNA-interacting partner-like
Medusa, Cyst, Polyp	BTB POZ domain-containing KCTD16
Medusa, Cyst, Polyp	iron-sulfur NUBPL
Medusa	pre translocase subunit partial
Cyst, Polyp	Leucine-rich repeat-containing 16A
Polyp	hypothetical protein THITH_08240
Cyst	ubiquitin- ligase E3B [Marmota marmota marmota]
Cyst, Polyp	pitchfork-like
Medusa, Cyst, Polyp	hsp90 co-chaperone Cdc37
Polyp	Myosin-2 essential light chain
Polyp	heat shock 68-like
Medusa, Cyst, Polyp	transmembrane and coiled-coil domain-containing 1
Polyp	rho GTPase-activating 27
Cyst, Polyp	transmembrane and coiled-coil domain-containing 3
Medusa, Cyst, Polyp	hypothetical protein AC249_AIPGENE28713
Polyp	rho GTPase-activating 22
Polyp	probable palmitoyltransferase ZDHHC1 isoform X1 [Poecilia mexicana]
Medusa, Cyst, Polyp	A G-specific adenine DNA glycosylase
Cyst	PREDICTED: uncharacterized protein LOC100888926
Medusa, Cyst, Polyp	BTB POZ domain-containing KCTD21
Medusa	rho GTPase-activating 19
Medusa	hypothetical protein LOTGIDRAFT_126236, partial [Lottia gigantea]
Cyst	rho GTPase-activating 18
Polyp	G patch domain-containing 4-like
Polyp	Serine threonine- kinase par-4 [Caenorhabditis elegans]
Medusa, Cyst	Sphingolipid delta(4)-desaturase DES1
Medusa, Cyst, Polyp	hypothetical protein AC249_AIPGENE14105
Cyst	RNA-binding 45-like
Medusa, Cyst, Polyp	tetratricopeptide repeat 39C
Medusa, Cyst, Polyp	Bardet-Biedl syndrome 4 isoform X1
Cyst	Bardet-Biedl syndrome 4 isoform X2
Medusa	Bardet-Biedl syndrome 4 isoform X3
Cyst	Bardet-Biedl syndrome 4 isoform X4
Cyst	alpha-ketoacid dehydrogenase subunit beta
Medusa, Polyp	Nuclear pore membrane glyco 210
Medusa, Cyst	ATP-dependent RNA helicase DHX8-like
Medusa	tetratricopeptide repeat 39B
Polyp	thioredoxin peroxidase [Trichomonas vaginalis G3]
Medusa, Cyst	rho GTPase-activating 15
Cyst, Polyp	hypothetical protein AC249_AIPGENE28724
Cyst	Protein FAM21
Polyp	Mitochondrial carrier domain [Metarhizium robertsii ARSEF 23]
Medusa, Cyst, Polyp	Tyrosine- phosphatase non-receptor type 11
Cyst	Tyrosine- phosphatase non-receptor type 13
Cyst, Polyp	spatacsin-like
Medusa, Cyst, Polyp	unconventional myosin-XVIIIa-like
Cyst	SWIB MDM2 domain-containing
Polyp	tetraspanin-17
Cyst	hypothetical protein TRIADDRAFT_56359 [Trichoplax adhaerens]
Cyst	transcription factor
Medusa	PREDICTED: uncharacterized protein LOC107352558
Medusa, Cyst, Polyp	chromodomain Y
Medusa, Cyst	hypothetical protein X777_03552
Medusa, Cyst, Polyp	histamine H2 receptor-like
Medusa	choline dehydrogenase [Chromobacterium piscinae]
Medusa	probable tubulin polyglutamylase TTLL9 isoform X2
Medusa	cysteine protease ATG4D
Medusa, Cyst, Polyp	cysteine protease ATG4B
Medusa, Cyst	G -coupled receptor 119 [Homo sapiens]
Polyp	Ankyrin repeat domain-containing 54
Medusa, Cyst, Polyp	PREDICTED: uncharacterized protein LOC100201272
Medusa, Cyst	PREDICTED: uncharacterized protein LOC107339571
Polyp	hypothetical protein CAPTEDRAFT_208943
Medusa, Polyp	ubiquitin ribosomal S27a fusion
Medusa, Cyst, Polyp	Ankyrin repeat domain-containing 50
Cyst	AGAP002739-PA [Anopheles gambiae PEST]
Medusa, Polyp	COBW domain-containing 1-like [Nothobranchius furzeri]
Medusa	arginine N-methyltransferase 7 isoform X2
Polyp	arginine N-methyltransferase 7 isoform X1
Polyp	CREB-binding -like isoform X1
Medusa, Cyst	kinesin light chain [Pochonia chlamydosporia 170]
Polyp	C-type lectin domain family 4 member D-like
Polyp	Ankyrin repeat domain-containing 49
Medusa, Polyp	Ankyrin repeat domain-containing 42
Cyst	RTX toxins and related Ca2+-binding [Saccharophagus degradans 2-40]
Medusa	Ankyrin repeat domain-containing 45
Cyst	TFIIH basal transcription factor complex helicase XPD subunit isoform X2
Polyp	fucoxanthin chlorophyll a c 4 [Thalassiosira pseudonana CCMP1335]
Medusa, Cyst, Polyp	cytosolic carboxypeptidase 2-like
Medusa, Polyp	neuropilin-2 isoform X6
Cyst	EF-Hand calcium-binding site [Purpureocillium lilacinum]
Medusa, Cyst, Polyp	rap1 GTPase-activating 1-like
Polyp	heat shock cognate 70
Medusa, Cyst	dystroglycan-like [Hydra vulgaris]
Polyp	SH3 domain-containing kinase-binding 1-like isoform X3
Cyst	SH3 domain-containing kinase-binding 1-like isoform X2
Medusa	prostaglandin reductase 2
Polyp	Spindly isoform X1
Polyp	dystrobrevin beta
Medusa	SH3 domain-containing kinase-binding 1-like isoform X1
Polyp	outer dynein arm light chain 8 [Chlamydomonas reinhardtii]
Medusa, Polyp	exonuclease 3 -5 domain-containing 2-like
Medusa	Extracellular sulfatase Sulf- partial
Medusa	methyltransferase 14 homolog
Polyp	NADPH oxidase activator partial
Medusa, Cyst, Polyp	hypothetical protein G7K_1412-t1
Polyp	30S ribosomal S9 [Legionella pneumophila]
Cyst	DDB1- and CUL4-associated factor 10 isoform X2
Polyp	PREDICTED: uncharacterized protein LOC100213271
Cyst	transcriptional regulator [Candidatus Thiodiazotropha endoloripes]
Cyst, Polyp	mitochondrial-like isoform X2
Medusa, Cyst, Polyp	endoplasmic reticulum resident 44
Polyp	fucoxanthin chlorophyll a c 8 [Thalassiosira pseudonana CCMP1335]
Cyst	dynein [Phytophthora infestans T30-4]
Cyst	metal-response element-binding transcription factor 2-like
Cyst, Polyp	serine threonine- kinase Sgk3
Cyst, Polyp	Band -like partial
Cyst, Polyp	transmembrane 107 isoform X1
Medusa, Cyst, Polyp	Ankyrin repeat domain-containing 66
Medusa, Cyst, Polyp	UPF0577 KIAA1324-like
Medusa, Cyst, Polyp	Ankyrin repeat domain-containing 60
Polyp	ras-related Rab-4B-like
Polyp	ribosomal S19 [Taeniopygia guttata]
Medusa	Ankyrin repeat domain-containing 63
Cyst	PREDICTED: uncharacterized protein LOC101071133
Polyp	protrudin isoform X1
Medusa, Polyp	protrudin isoform X2
Polyp	tyrosine aminotransferase-like [Salmo salar]
Polyp	40S ribosomal S15a
Polyp	40S ribosomal S19 [Zea mays]
Medusa, Polyp	potassium voltage-gated channel subfamily H member 7 isoform X6
Cyst	nadh:ubiquinone oxidoreductase subunit
Medusa, Cyst	phosphoinositide 3-kinase adapter 1
Medusa, Cyst, Polyp	PREDICTED: uncharacterized protein LOC100215884
Cyst	dachsous
Polyp	fatty aldehyde dehydrogenase isoform X1 [Ficedula albicollis]
Polyp	TPA: endo-1,3(4)-beta- (AFU_orthologue AFUA_1G05290) [Aspergillus nidulans FGSC A4]
Cyst	Uncharacterized conserved DUF1501 family
Medusa, Cyst	AP-3 complex subunit delta-1
Polyp	ras-related Rap-2a-like
Cyst	NADH dehydrogenase [Arcobacter butzleri]
Polyp	sodium bile acid cotransporter 7 isoform X1
Medusa, Polyp	6-pyruvoyl tetrahydrobiopterin synthase
Polyp	endoplasmic reticulum resident 29
Polyp	fructose-bisphosphate aldolase 4 [Arabidopsis thaliana]
Medusa	CRE-VIT-6 [Caenorhabditis remanei]
Polyp	C-type lectin domain family 4 member A [Ovis aries]
Medusa, Polyp	phosphatidylinositol 4,5-bisphosphate 3-kinase catalytic subunit delta isoform isoform X1
Medusa	serine threonine- kinase Doa isoform X9 [Apis mellifera]
Polyp	peptidyl-prolyl cis-trans isomerase FKBP1A-like
Polyp	eukaryotic translation initiation factor 2 subunit 1-like
Polyp	Venom allergen 3
Polyp	calcium calmodulin-dependent kinase type II subunit beta
Medusa, Cyst, Polyp	Fibrinogen C domain-containing 1
Medusa, Cyst, Polyp	PREDICTED: uncharacterized protein LOC100213200
Cyst	phenylethanolamine N-methyltransferase-like [Xenopus laevis]
Polyp	twinstar [Drosophila melanogaster]
Medusa	PREDICTED: uncharacterized protein LOC105850534, partial
Medusa, Cyst	TPA: endonuclease-reverse transcriptase
Cyst, Polyp	transcriptional coactivator YAP1 isoform X1
Medusa, Cyst	villin [Pygocentrus nattereri]
Polyp	meiosis arrest female 1 homolog isoform X4
Medusa, Cyst, Polyp	spermatogenesis-defective 39 homolog
Polyp	DNA-binding RFX2- partial
Cyst	AGC variant [Aphanomyces astaci]
Polyp	Transitional endoplasmic reticulum partial
Polyp	PREDICTED: uncharacterized protein LOC100213236
Medusa, Cyst, Polyp	Uncharacterised [Streptococcus equi equi]
Cyst	protease Do-like mitochondrial
Medusa	hippocampus abundant transcript 1 -like
Medusa	ankyrin repeat domain-containing 29 isoform X3
Cyst	LIM domain and actin-binding 1-like
Cyst	amidophosphoribosyltransferase-like
Polyp	PACRG- partial
Medusa, Cyst, Polyp	HIG1 domain family member 1C-like
[truncated: 35,099 more rows]

## Sheet: Additional File J
Additional File J: Cyst vs. Polyp GO comparative analysis. Comprehensive output of the Cyst vs. Polyp functional gene enrichment analysis of the biological processes’ GO domain (FDR p-value cutoff of 0.01 utilized).
Cyst vs Polyp (Biological Processes: FDR=0.01)
#	Expression	GO ID	GO Name	FDR	P-value	Cyst	Polyp
1	OVER	GO:0006259	DNA metabolic process	4.92739e-39	1.35345e-41	2643	1904
2	OVER	GO:0006278	RNA-dependent DNA biosynthetic process	9.88125e-31	4.74978e-33	704	355
3	OVER	GO:0090304	nucleic acid metabolic process	1.56443e-23	1.32943e-25	6004	5324
4	OVER	GO:0071897	DNA biosynthetic process	7.87185e-21	8.58133e-23	821	511
5	OVER	GO:0015074	DNA integration	5.73099e-17	8.31362e-19	636	390
6	OVER	GO:0000160	phosphorelay signal transduction system	1.14305e-08	3.74803e-10	43	4
7	OVER	GO:0006139	nucleobase-containing compound metabolic process	1.6205e-07	6.38465e-09	7059	6890
8	OVER	GO:0090305	nucleic acid phosphodiester bond hydrolysis	7.56015e-07	3.22523e-08	495	363
9	OVER	GO:0006725	cellular aromatic compound metabolic process	9.51139e-07	4.13929e-08	7395	7273
10	OVER	GO:0006399	tRNA metabolic process	9.65619e-07	4.2106e-08	399	280
11	OVER	GO:0046483	heterocycle metabolic process	1.31595e-06	5.85118e-08	7420	7306
12	OVER	GO:1901362	organic cyclic compound biosynthetic process	1.62831e-06	7.37982e-08	3698	3503
13	OVER	GO:0018130	heterocycle biosynthetic process	1.83534e-06	8.44413e-08	3614	3420
14	OVER	GO:1901360	organic cyclic compound metabolic process	2.59757e-06	1.23301e-07	7585	7493
15	OVER	GO:0006400	tRNA modification	2.99093e-06	1.44284e-07	129	63
16	OVER	GO:0019438	aromatic compound biosynthetic process	9.98927e-06	5.27331e-07	3530	3363
17	OVER	GO:0034654	nucleobase-containing compound biosynthetic process	1.11461e-05	5.94139e-07	3388	3221
18	OVER	GO:0000723	telomere maintenance	3.49875e-05	2.04238e-06	234	154
19	OVER	GO:0032200	telomere organization	0.000105768	6.86358e-06	236	160
20	OVER	GO:0006353	DNA-templated transcription, termination	0.000662735	5.10847e-05	114	66
21	OVER	GO:0008033	tRNA processing	0.000730967	5.70342e-05	212	148
22	OVER	GO:0032508	DNA duplex unwinding	0.00103348	8.37426e-05	185	126
23	OVER	GO:0032392	DNA geometric change	0.0011657	9.62581e-05	192	133
24	OVER	GO:0009272	fungal-type cell wall biogenesis	0.00204829	0.000182852	15	1
25	OVER	GO:0032196	transposition	0.00273325	0.00025479	76	40
26	OVER	GO:0072386	plus-end-directed organelle transport along microtubule	0.00274184	0.000257762	34	11
27	OVER	GO:0072383	plus-end-directed vesicle transport along microtubule	0.00274184	0.000257762	34	11
28	OVER	GO:0006281	DNA repair	0.00276201	0.000261739	831	742
29	OVER	GO:0032197	transposition, RNA-mediated	0.00293853	0.000279579	17	2
30	OVER	GO:0072114	pronephros morphogenesis	0.00341154	0.000329441	11	0
31	OVER	GO:0043952	protein transport by the Sec complex	0.00341154	0.000329441	11	0
32	OVER	GO:0042967	acyl-carrier-protein biosynthetic process	0.00377586	0.000371104	212	156
33	OVER	GO:0009451	RNA modification	0.00470295	0.000475543	243	185
34	OVER	GO:0016180	snRNA processing	0.00581331	0.000608277	62	32
35	OVER	GO:0097588	archaeal or bacterial-type flagellum-dependent cell motility	0.00642368	0.000691441	13	1
36	OVER	GO:0000472	endonucleolytic cleavage to generate mature 5'-end of SSU-rRNA from (SSU-rRNA, 5.8S rRNA, LSU-rRNA)	0.00642368	0.000691441	13	1
37	OVER	GO:0071973	bacterial-type flagellum-dependent cell motility	0.00642368	0.000691441	13	1
38	OVER	GO:0000966	RNA 5'-end processing	0.00642368	0.000691441	13	1
39	OVER	GO:0034471	ncRNA 5'-end processing	0.00642368	0.000691441	13	1
40	OVER	GO:0000967	rRNA 5'-end processing	0.00642368	0.000691441	13	1
41	OVER	GO:0071852	fungal-type cell wall organization or biogenesis	0.00652623	0.000704161	22	5
42	OVER	GO:0000480	endonucleolytic cleavage in 5'-ETS of tricistronic rRNA transcript (SSU-rRNA, 5.8S rRNA, LSU-rRNA)	0.00856521	0.000960921	15	2
43	OVER	GO:0043038	amino acid activation	0.00920595	0.00104705	165	119
44	OVER	GO:0043039	tRNA aminoacylation	0.00920595	0.00104705	165	119
45	UNDER	GO:0019538	protein metabolic process	5.07363e-126	4.35504e-130	5699	9022
46	UNDER	GO:0008152	metabolic process	2.04909e-122	4.13836e-126	14989	20234
47	UNDER	GO:0006412	translation	2.04909e-122	5.27663e-126	1352	3048
48	UNDER	GO:0043043	peptide biosynthetic process	1.10846e-119	3.80587e-123	1385	3076
49	UNDER	GO:0044267	cellular protein metabolic process	3.07804e-119	1.32105e-122	4629	7551
50	UNDER	GO:0043604	amide biosynthetic process	2.41136e-116	1.2419e-119	1465	3169
51	UNDER	GO:0006518	peptide metabolic process	1.81277e-113	1.08922e-116	1534	3249
52	UNDER	GO:0042254	ribosome biogenesis	4.70402e-113	3.23023e-116	982	2397
53	UNDER	GO:0044085	cellular component biogenesis	1.07624e-109	8.31429e-113	2367	4411
54	UNDER	GO:0043603	cellular amide metabolic process	1.07245e-107	9.20554e-111	1729	3485
55	UNDER	GO:1901564	organonitrogen compound metabolic process	4.43688e-104	4.18932e-107	4025	6580
56	UNDER	GO:0022613	ribonucleoprotein complex biogenesis	6.67781e-103	6.87843e-106	1182	2632
57	UNDER	GO:1901566	organonitrogen compound biosynthetic process	5.38157e-100	6.00518e-103	2124	3977
58	UNDER	GO:0044699	single-organism process	6.54419e-83	7.86426e-86	11375	15260
59	UNDER	GO:0071840	cellular component organization or biogenesis	4.11406e-77	5.29708e-80	4514	6859
60	UNDER	GO:0009987	cellular process	1.56096e-72	2.14381e-75	17204	21776
61	UNDER	GO:0051179	localization	2.13088e-63	3.10944e-66	4593	6757
62	UNDER	GO:0006810	transport	1.42872e-60	2.20746e-63	4095	6093
63	UNDER	GO:0051234	establishment of localization	1.44168e-60	2.35124e-63	4156	6169
64	UNDER	GO:0044763	single-organism cellular process	2.51094e-49	4.31063e-52	7638	10183
65	UNDER	GO:0050896	response to stimulus	4.46535e-47	8.04912e-50	5005	6992
66	UNDER	GO:0050789	regulation of biological process	8.81896e-47	1.66538e-49	6859	9208
67	UNDER	GO:0071704	organic substance metabolic process	2.25957e-44	4.46096e-47	13477	16824
68	UNDER	GO:0050794	regulation of cellular process	1.60763e-43	3.31186e-46	6571	8798
69	UNDER	GO:0065007	biological regulation	5.72365e-43	1.22825e-45	7612	10015
70	UNDER	GO:1902578	single-organism localization	6.47943e-43	1.44605e-45	1582	2633
71	UNDER	GO:0032501	multicellular organismal process	1.80023e-41	4.17221e-44	2484	3782
72	UNDER	GO:0044238	primary metabolic process	2.36514e-41	5.68447e-44	12987	16181
73	UNDER	GO:0051246	regulation of protein metabolic process	2.61998e-41	6.52184e-44	1193	2092
74	UNDER	GO:0032268	regulation of cellular protein metabolic process	3.67659e-41	9.4676e-44	1125	1997
75	UNDER	GO:0008104	protein localization	4.36657e-40	1.16192e-42	1223	2119
76	UNDER	GO:0044767	single-organism developmental process	2.3722e-37	6.71954e-40	2378	3587
77	UNDER	GO:0032502	developmental process	4.61352e-37	1.34644e-39	2429	3647
78	UNDER	GO:0044707	single-multicellular organism process	4.80556e-37	1.44373e-39	2269	3444
79	UNDER	GO:0015031	protein transport	6.19111e-37	1.91313e-39	957	1721
80	UNDER	GO:0034220	ion transmembrane transport	6.81859e-37	2.16556e-39	582	1188
81	UNDER	GO:0045184	establishment of protein localization	8.46422e-37	2.76086e-39	1007	1788
82	UNDER	GO:0006811	ion transport	8.65898e-36	2.89872e-38	1331	2213
83	UNDER	GO:0048856	anatomical structure development	4.65829e-35	1.59941e-37	2242	3380
84	UNDER	GO:0033036	macromolecule localization	1.94847e-34	6.85726e-37	1569	2509
85	UNDER	GO:0044765	single-organism transport	3.43786e-34	1.2394e-36	1525	2448
86	UNDER	GO:0006091	generation of precursor metabolites and energy	5.06351e-34	1.86894e-36	588	1170
87	UNDER	GO:0044710	single-organism metabolic process	1.64386e-33	6.20856e-36	5039	6764
88	UNDER	GO:0098655	cation transmembrane transport	1.71724e-33	6.63312e-36	446	956
89	UNDER	GO:0098662	inorganic cation transmembrane transport	1.98509e-33	7.83812e-36	376	849
90	UNDER	GO:0006508	proteolysis	2.47867e-33	9.99978e-36	1623	2564
91	UNDER	GO:0098660	inorganic ion transmembrane transport	1.56526e-32	6.44913e-35	394	869
92	UNDER	GO:0006812	cation transport	2.39828e-32	1.00872e-34	907	1602
93	UNDER	GO:0006457	protein folding	2.70575e-32	1.16127e-34	324	759
94	UNDER	GO:0007275	multicellular organism development	7.21194e-32	3.15716e-34	2005	3032
95	UNDER	GO:0022607	cellular component assembly	1.42934e-31	6.37986e-34	1489	2366
96	UNDER	GO:0009057	macromolecule catabolic process	1.44408e-31	6.56963e-34	853	1519
97	UNDER	GO:0055085	transmembrane transport	2.55315e-31	1.18343e-33	1356	2189
98	UNDER	GO:0010467	gene expression	5.46282e-31	2.57901e-33	4618	6208
99	UNDER	GO:0009056	catabolic process	1.44699e-30	7.07968e-33	1552	2434
100	UNDER	GO:0055114	oxidation-reduction process	2.85661e-30	1.42218e-32	1694	2612
101	UNDER	GO:0042221	response to chemical	6.79155e-30	3.4395e-32	1217	1989
102	UNDER	GO:1901575	organic substance catabolic process	7.39477e-30	3.80847e-32	1526	2390
103	UNDER	GO:0034613	cellular protein localization	8.45912e-29	4.42924e-31	974	1652
104	UNDER	GO:0044237	cellular metabolic process	9.20755e-29	4.90016e-31	12530	15280
105	UNDER	GO:0070727	cellular macromolecule localization	1.13004e-28	6.11095e-31	980	1659
106	UNDER	GO:0007154	cell communication	3.60837e-28	1.98228e-30	3349	4627
107	UNDER	GO:0007165	signal transduction	3.80577e-28	2.12339e-30	3116	4344
108	UNDER	GO:0044265	cellular macromolecule catabolic process	1.83256e-27	1.03819e-29	720	1292
109	UNDER	GO:0015672	monovalent inorganic cation transport	2.80301e-27	1.61203e-29	489	964
110	UNDER	GO:0071702	organic substance transport	3.80771e-27	2.22253e-29	1531	2359
111	UNDER	GO:0009205	purine ribonucleoside triphosphate metabolic process	4.04462e-27	2.39552e-29	496	973
112	UNDER	GO:0015979	photosynthesis	4.42123e-27	2.65654e-29	0	100
113	UNDER	GO:0023052	signaling	5.3753e-27	3.27594e-29	3293	4536
114	UNDER	GO:0048518	positive regulation of biological process	5.61167e-27	3.46816e-29	1920	2849
115	UNDER	GO:0044700	single organism signaling	9.62459e-27	6.03086e-29	3285	4521
116	UNDER	GO:0051704	multi-organism process	1.42007e-26	9.02021e-29	474	936
117	UNDER	GO:0010608	posttranscriptional regulation of gene expression	1.47655e-26	9.5057e-29	497	969
118	UNDER	GO:0009199	ribonucleoside triphosphate metabolic process	1.53203e-26	9.99433e-29	509	986
119	UNDER	GO:0009144	purine nucleoside triphosphate metabolic process	1.75375e-26	1.15913e-28	505	979
120	UNDER	GO:0009141	nucleoside triphosphate metabolic process	2.57304e-26	1.72272e-28	527	1009
121	UNDER	GO:0065008	regulation of biological quality	5.34755e-26	3.62624e-28	1576	2399
122	UNDER	GO:0046034	ATP metabolic process	9.92418e-26	6.81489e-28	454	899
123	UNDER	GO:0043933	macromolecular complex subunit organization	1.10997e-25	7.71737e-28	1153	1850
124	UNDER	GO:1901135	carbohydrate derivative metabolic process	2.44854e-25	1.72344e-27	1395	2158
125	UNDER	GO:0051641	cellular localization	2.78975e-25	1.98755e-27	1552	2357
126	UNDER	GO:0002119	nematode larval development	6.20157e-25	4.47152e-27	4	112
127	UNDER	GO:0009150	purine ribonucleotide metabolic process	6.26979e-25	4.57453e-27	606	1106
128	UNDER	GO:0048522	positive regulation of cellular process	6.68387e-25	4.93402e-27	1718	2561
129	UNDER	GO:1902589	single-organism organelle organization	1.2443e-24	9.2922e-27	932	1545
130	UNDER	GO:0046128	purine ribonucleoside metabolic process	1.27181e-24	9.60678e-27	584	1072
131	UNDER	GO:0042278	purine nucleoside metabolic process	1.98343e-24	1.51524e-26	587	1075
132	UNDER	GO:0051716	cellular response to stimulus	1.98672e-24	1.53481e-26	4350	5743
133	UNDER	GO:0006886	intracellular protein transport	2.33952e-24	1.82744e-26	719	1256
134	UNDER	GO:0043170	macromolecule metabolic process	2.81103e-24	2.21987e-26	10871	13252
135	UNDER	GO:0009259	ribonucleotide metabolic process	4.19211e-24	3.34649e-26	628	1128
136	UNDER	GO:0019693	ribose phosphate metabolic process	6.10926e-24	4.92936e-26	682	1200
137	UNDER	GO:0009628	response to abiotic stimulus	8.71027e-24	7.10279e-26	315	676
138	UNDER	GO:0019684	photosynthesis, light reaction	9.58514e-24	7.89849e-26	0	88
139	UNDER	GO:0044248	cellular catabolic process	1.25952e-23	1.05951e-25	1312	2026
140	UNDER	GO:0044271	cellular nitrogen compound biosynthetic process	1.25952e-23	1.05232e-25	4800	6253
141	UNDER	GO:0070925	organelle assembly	1.83597e-23	1.57594e-25	505	949
142	UNDER	GO:0006163	purine nucleotide metabolic process	2.77475e-23	2.40558e-25	634	1127
143	UNDER	GO:1901576	organic substance biosynthetic process	2.86583e-23	2.50914e-25	6213	7892
144	UNDER	GO:0009058	biosynthetic process	4.2309e-23	3.74062e-25	6341	8035
145	UNDER	GO:0002164	larval development	4.39912e-23	3.92711e-25	10	126
146	UNDER	GO:0016043	cellular component organization	4.54181e-23	4.09348e-25	3662	4895
147	UNDER	GO:0065003	macromolecular complex assembly	5.03733e-23	4.62656e-25	1023	1644
148	UNDER	GO:0009119	ribonucleoside metabolic process	5.03733e-23	4.61132e-25	620	1105
149	UNDER	GO:0009605	response to external stimulus	1.17922e-22	1.09318e-24	445	856
150	UNDER	GO:0051247	positive regulation of protein metabolic process	1.65582e-22	1.56343e-24	485	911
151	UNDER	GO:0006417	regulation of translation	1.65582e-22	1.56221e-24	458	873
152	UNDER	GO:0034248	regulation of cellular amide metabolic process	2.12637e-22	2.02598e-24	464	881
153	UNDER	GO:0009116	nucleoside metabolic process	2.2745e-22	2.18664e-24	655	1146
154	UNDER	GO:1901657	glycosyl compound metabolic process	2.57907e-22	2.50159e-24	668	1163
155	UNDER	GO:0010033	response to organic substance	6.35915e-22	6.22269e-24	763	1286
156	UNDER	GO:0009167	purine ribonucleoside monophosphate metabolic process	6.73563e-22	6.70672e-24	507	936
157	UNDER	GO:0009126	purine nucleoside monophosphate metabolic process	6.73563e-22	6.70672e-24	507	936
158	UNDER	GO:0009765	photosynthesis, light harvesting	8.55556e-22	8.62869e-24	0	81
159	UNDER	GO:0005975	carbohydrate metabolic process	8.55556e-22	8.66572e-24	708	1211
160	UNDER	GO:0002376	immune system process	9.43718e-22	9.63969e-24	612	1080
161	UNDER	GO:0002181	cytoplasmic translation	1.17125e-21	1.20644e-23	130	366
162	UNDER	GO:0006913	nucleocytoplasmic transport	1.80882e-21	1.87869e-23	273	593
163	UNDER	GO:0032270	positive regulation of cellular protein metabolic process	2.4044e-21	2.51791e-23	462	867
164	UNDER	GO:0051649	establishment of localization in cell	2.6844e-21	2.83417e-23	1295	1970
165	UNDER	GO:0051169	nuclear transport	3.40861e-21	3.62805e-23	276	595
166	UNDER	GO:0006818	hydrogen transport	5.54297e-21	5.94739e-23	307	640
167	UNDER	GO:0009123	nucleoside monophosphate metabolic process	5.97311e-21	6.46019e-23	532	961
168	UNDER	GO:0009893	positive regulation of metabolic process	8.52578e-21	9.36738e-23	1081	1689
169	UNDER	GO:0009161	ribonucleoside monophosphate metabolic process	9.48184e-21	1.04992e-22	529	954
170	UNDER	GO:0030001	metal ion transport	2.00735e-20	2.23996e-22	456	849
171	UNDER	GO:0015992	proton transport	2.12188e-20	2.38597e-22	307	634
172	UNDER	GO:0044249	cellular biosynthetic process	2.52041e-20	2.85574e-22	6122	7702
173	UNDER	GO:0016310	phosphorylation	2.83381e-20	3.23517e-22	1985	2814
174	UNDER	GO:0072521	purine-containing compound metabolic process	3.09045e-20	3.55468e-22	805	1321
175	UNDER	GO:0006796	phosphate-containing compound metabolic process	6.24464e-20	7.23628e-22	2951	3977
176	UNDER	GO:0048869	cellular developmental process	6.35842e-20	7.4227e-22	1254	1897
177	UNDER	GO:0036211	protein modification process	8.4959e-20	1.00638e-21	3001	4034
178	UNDER	GO:0006464	cellular protein modification process	8.4959e-20	1.00638e-21	3001	4034
179	UNDER	GO:0031325	positive regulation of cellular metabolic process	1.23275e-19	1.47083e-21	1004	1573
180	UNDER	GO:0042255	ribosome assembly	1.5452e-19	1.86772e-21	135	360
181	UNDER	GO:0051603	proteolysis involved in cellular protein catabolic process	1.5452e-19	1.87016e-21	488	885
182	UNDER	GO:0006793	phosphorus metabolic process	2.75432e-19	3.35719e-21	3017	4041
183	UNDER	GO:0044257	cellular protein catabolic process	2.96777e-19	3.64284e-21	501	900
184	UNDER	GO:0009791	post-embryonic development	3.12841e-19	3.86688e-21	47	198
185	UNDER	GO:0009059	macromolecule biosynthetic process	3.20156e-19	3.98477e-21	4962	6327
186	UNDER	GO:0006414	translational elongation	3.43243e-19	4.30158e-21	189	445
187	UNDER	GO:0034622	cellular macromolecular complex assembly	3.48563e-19	4.39818e-21	836	1348
188	UNDER	GO:0034645	cellular macromolecule biosynthetic process	4.19934e-19	5.33479e-21	4919	6274
189	UNDER	GO:0030163	protein catabolic process	4.95033e-19	6.33132e-21	558	975
190	UNDER	GO:0051239	regulation of multicellular organismal process	5.53962e-19	7.13255e-21	600	1032
191	UNDER	GO:0048523	negative regulation of cellular process	6.30894e-19	8.17725e-21	1493	2182
192	UNDER	GO:0048519	negative regulation of biological process	6.90116e-19	9.00409e-21	1631	2352
193	UNDER	GO:0006753	nucleoside phosphate metabolic process	7.33769e-19	9.63663e-21	909	1439
194	UNDER	GO:0048731	system development	9.80736e-19	1.29642e-20	1698	2433
195	UNDER	GO:0046907	intracellular transport	1.0479e-18	1.39421e-20	1192	1800
196	UNDER	GO:0006950	response to stress	1.17818e-18	1.57765e-20	1899	2678
197	UNDER	GO:0030154	cell differentiation	1.46278e-18	1.97129e-20	1177	1778
198	UNDER	GO:0009117	nucleotide metabolic process	2.25581e-18	3.05939e-20	902	1423
199	UNDER	GO:0006123	mitochondrial electron transport, cytochrome c to oxygen	3.01029e-18	4.10847e-20	45	189
200	UNDER	GO:0010604	positive regulation of macromolecule metabolic process	3.58731e-18	4.92678e-20	1011	1561
201	UNDER	GO:0018298	protein-chromophore linkage	4.25518e-18	5.88055e-20	1	73
202	UNDER	GO:0048513	animal organ development	4.76623e-18	6.62772e-20	1175	1768
203	UNDER	GO:0042273	ribosomal large subunit biogenesis	4.93349e-18	6.90265e-20	132	344
204	UNDER	GO:1902600	hydrogen ion transmembrane transport	6.01576e-18	8.46854e-20	190	437
205	UNDER	GO:0044419	interspecies interaction between organisms	7.61588e-18	1.07864e-19	223	486
206	UNDER	GO:0051128	regulation of cellular component organization	1.13443e-17	1.61644e-19	928	1447
207	UNDER	GO:0032879	regulation of localization	3.76416e-17	5.39583e-19	701	1144
208	UNDER	GO:0044087	regulation of cellular component biogenesis	4.18131e-17	6.0297e-19	294	585
209	UNDER	GO:0090150	establishment of protein localization to membrane	7.3749e-17	1.07617e-18	155	373
210	UNDER	GO:0019222	regulation of metabolic process	8.12438e-17	1.1925e-18	3301	4320
211	UNDER	GO:0030162	regulation of proteolysis	8.47591e-17	1.25138e-18	183	417
212	UNDER	GO:0006952	defense response	2.24067e-16	3.32735e-18	250	515
213	UNDER	GO:0070887	cellular response to chemical stimulus	2.30959e-16	3.44951e-18	803	1267
214	UNDER	GO:0006996	organelle organization	2.98275e-16	4.48052e-18	2653	3539
215	UNDER	GO:0007010	cytoskeleton organization	4.56219e-16	6.89223e-18	686	1111
216	UNDER	GO:0022904	respiratory electron transport chain	5.80078e-16	8.8132e-18	146	352
217	UNDER	GO:0080134	regulation of response to stress	5.89533e-16	9.00746e-18	345	648
218	UNDER	GO:0031323	regulation of cellular metabolic process	5.9859e-16	9.19722e-18	3112	4076
219	UNDER	GO:0055086	nucleobase-containing small molecule metabolic process	6.00339e-16	9.27562e-18	1102	1643
220	UNDER	GO:0006413	translational initiation	6.42236e-16	9.97809e-18	245	503
221	UNDER	GO:0009607	response to biotic stimulus	1.12029e-15	1.75015e-17	167	383
222	UNDER	GO:0051174	regulation of phosphorus metabolic process	1.58348e-15	2.48736e-17	477	825
223	UNDER	GO:0044403	symbiosis, encompassing mutualism through parasitism	1.929e-15	3.04667e-17	210	447
224	UNDER	GO:0019220	regulation of phosphate metabolic process	2.39315e-15	3.80029e-17	477	823
225	UNDER	GO:0071822	protein complex subunit organization	2.40555e-15	3.84063e-17	687	1103
226	UNDER	GO:0019058	viral life cycle	2.58195e-15	4.14441e-17	158	366
227	UNDER	GO:0072657	protein localization to membrane	3.14066e-15	5.06818e-17	207	440
228	UNDER	GO:0080090	regulation of primary metabolic process	3.8124e-15	6.18493e-17	3115	4060
229	UNDER	GO:0010259	multicellular organism aging	4.60103e-15	7.50382e-17	7	84
230	UNDER	GO:0044093	positive regulation of molecular function	5.07775e-15	8.3249e-17	573	948
231	UNDER	GO:0090066	regulation of anatomical structure size	7.70301e-15	1.26951e-16	168	378
232	UNDER	GO:0060255	regulation of macromolecule metabolic process	7.92898e-15	1.31356e-16	3173	4120
233	UNDER	GO:0044764	multi-organism cellular process	9.46898e-15	1.57681e-16	217	451
234	UNDER	GO:0031399	regulation of protein modification process	1.04556e-14	1.75008e-16	564	932
235	UNDER	GO:0042775	mitochondrial ATP synthesis coupled electron transport	1.14777e-14	1.93101e-16	131	319
236	UNDER	GO:0043412	macromolecule modification	1.17076e-14	1.97974e-16	3258	4215
237	UNDER	GO:0019637	organophosphate metabolic process	1.27632e-14	2.1692e-16	1262	1821
238	UNDER	GO:0034976	response to endoplasmic reticulum stress	1.31385e-14	2.24426e-16	136	326
239	UNDER	GO:0006897	endocytosis	1.43472e-14	2.46304e-16	234	475
240	UNDER	GO:0070972	protein localization to endoplasmic reticulum	1.46624e-14	2.52974e-16	86	243
241	UNDER	GO:0030036	actin cytoskeleton organization	1.87767e-14	3.26859e-16	317	593
242	UNDER	GO:0022900	electron transport chain	1.87767e-14	3.27182e-16	166	372
243	UNDER	GO:0045862	positive regulation of proteolysis	2.43041e-14	4.25582e-16	109	280
244	UNDER	GO:0006614	SRP-dependent cotranslational protein targeting to membrane	2.86616e-14	5.06806e-16	59	194
245	UNDER	GO:0042773	ATP synthesis coupled electron transport	2.86616e-14	5.0467e-16	135	322
246	UNDER	GO:0044260	cellular macromolecule metabolic process	3.15646e-14	5.60848e-16	9735	11593
247	UNDER	GO:0043085	positive regulation of catalytic activity	3.717e-14	6.63636e-16	499	839
248	UNDER	GO:0009768	photosynthesis, light harvesting in photosystem I	3.91864e-14	7.03e-16	0	53
249	UNDER	GO:0009894	regulation of catabolic process	3.95411e-14	7.12758e-16	154	350
250	UNDER	GO:0009792	embryo development ending in birth or egg hatching	4.03356e-14	7.30541e-16	276	531
251	UNDER	GO:0000003	reproduction	4.10715e-14	7.47395e-16	426	740
252	UNDER	GO:0007015	actin filament organization	5.42013e-14	9.90976e-16	196	413
253	UNDER	GO:0006448	regulation of translational elongation	5.66295e-14	1.04023e-15	159	357
254	UNDER	GO:0016567	protein ubiquitination	6.11568e-14	1.12865e-15	550	904
255	UNDER	GO:0097435	supramolecular fiber organization	7.54296e-14	1.39852e-15	311	578
256	UNDER	GO:0032446	protein modification by small protein conjugation	8.64481e-14	1.61024e-15	609	980
257	UNDER	GO:0030029	actin filament-based process	9.1761e-14	1.71707e-15	336	612
258	UNDER	GO:0031329	regulation of cellular catabolic process	1.09271e-13	2.05411e-15	112	281
259	UNDER	GO:0015980	energy derivation by oxidation of organic compounds	1.21603e-13	2.29637e-15	391	687
260	UNDER	GO:0016032	viral process	1.28089e-13	2.42985e-15	204	422
261	UNDER	GO:0071310	cellular response to organic substance	1.30172e-13	2.48054e-15	563	917
262	UNDER	GO:0035556	intracellular signal transduction	1.55074e-13	2.96836e-15	1455	2039
263	UNDER	GO:0048583	regulation of response to stimulus	1.80521e-13	3.47096e-15	1161	1675
264	UNDER	GO:0008219	cell death	2.03104e-13	3.92261e-15	672	1057
265	UNDER	GO:0007264	small GTPase mediated signal transduction	2.41043e-13	4.67602e-15	556	904
266	UNDER	GO:0009790	embryo development	2.4113e-13	4.69842e-15	535	876
267	UNDER	GO:0008340	determination of adult lifespan	2.45565e-13	4.8059e-15	7	77
268	UNDER	GO:0044281	small molecule metabolic process	2.52659e-13	4.96644e-15	3013	3892
269	UNDER	GO:0048584	positive regulation of response to stimulus	2.57689e-13	5.08741e-15	472	792
270	UNDER	GO:0006613	cotranslational protein targeting to membrane	2.62499e-13	5.20491e-15	63	195
271	UNDER	GO:0051173	positive regulation of nitrogen compound metabolic process	2.65228e-13	5.28179e-15	666	1047
272	UNDER	GO:0051049	regulation of transport	2.68059e-13	5.36117e-15	509	841
273	UNDER	GO:0032535	regulation of cellular component size	3.35697e-13	6.74276e-15	146	331
274	UNDER	GO:0022618	ribonucleoprotein complex assembly	3.55621e-13	7.17347e-15	340	611
275	UNDER	GO:0043207	response to external biotic stimulus	4.34064e-13	8.83032e-15	148	333
276	UNDER	GO:0051707	response to other organism	4.34064e-13	8.83032e-15	148	333
277	UNDER	GO:0051129	negative regulation of cellular component organization	4.34918e-13	8.88501e-15	171	368
278	UNDER	GO:0051130	positive regulation of cellular component organization	4.69158e-13	9.62479e-15	457	769
279	UNDER	GO:0006119	oxidative phosphorylation	5.37634e-13	1.10757e-14	258	494
280	UNDER	GO:0006816	calcium ion transport	6.2514e-13	1.29321e-14	121	289
281	UNDER	GO:0016052	carbohydrate catabolic process	7.23943e-13	1.50381e-14	173	369
282	UNDER	GO:0008154	actin polymerization or depolymerization	8.52919e-13	1.77905e-14	125	295
283	UNDER	GO:0007166	cell surface receptor signaling pathway	1.04003e-12	2.18309e-14	872	1301
284	UNDER	GO:0050793	regulation of developmental process	1.04003e-12	2.18718e-14	557	897
285	UNDER	GO:0043254	regulation of protein complex assembly	1.07104e-12	2.26159e-14	194	399
286	UNDER	GO:0065009	regulation of molecular function	1.64804e-12	3.49412e-14	1127	1616
287	UNDER	GO:0006955	immune response	1.93651e-12	4.15561e-14	256	486
288	UNDER	GO:0034097	response to cytokine	1.93651e-12	4.13289e-14	146	324
289	UNDER	GO:0000184	nuclear-transcribed mRNA catabolic process, nonsense-mediated decay	1.93651e-12	4.15095e-14	65	193
290	UNDER	GO:0051493	regulation of cytoskeleton organization	1.9463e-12	4.19331e-14	187	386
291	UNDER	GO:0070588	calcium ion transmembrane transport	2.03023e-12	4.39158e-14	73	207
292	UNDER	GO:0006612	protein targeting to membrane	2.21865e-12	4.81818e-14	94	242
293	UNDER	GO:0070647	protein modification by small protein conjugation or removal	2.50985e-12	5.47211e-14	764	1158
294	UNDER	GO:0045047	protein targeting to ER	2.51036e-12	5.49479e-14	74	208
295	UNDER	GO:0051240	positive regulation of multicellular organismal process	3.6472e-12	8.01445e-14	249	473
296	UNDER	GO:0071826	ribonucleoprotein complex subunit organization	3.80521e-12	8.39432e-14	354	619
297	UNDER	GO:0032269	negative regulation of cellular protein metabolic process	3.86329e-12	8.55562e-14	268	500
298	UNDER	GO:0072599	establishment of protein localization to endoplasmic reticulum	4.453e-12	9.8998e-14	75	208
299	UNDER	GO:0051248	negative regulation of protein metabolic process	5.70148e-12	1.27243e-13	289	528
300	UNDER	GO:0019080	viral gene expression	8.90016e-12	1.99394e-13	62	184
301	UNDER	GO:1903047	mitotic cell cycle process	9.01487e-12	2.02738e-13	434	722
302	UNDER	GO:0045333	cellular respiration	1.15561e-11	2.6088e-13	330	581
303	UNDER	GO:0009653	anatomical structure morphogenesis	1.28179e-11	2.90466e-13	997	1439
304	UNDER	GO:0007017	microtubule-based process	1.79648e-11	4.08642e-13	704	1069
305	UNDER	GO:0048857	neural nucleus development	1.8475e-11	4.21833e-13	23	107
306	UNDER	GO:0044089	positive regulation of cellular component biogenesis	1.88821e-11	4.32749e-13	178	364
307	UNDER	GO:1903320	regulation of protein modification by small protein conjugation or removal	1.94203e-11	4.46751e-13	95	237
308	UNDER	GO:0019083	viral transcription	2.07542e-11	4.79217e-13	58	174
309	UNDER	GO:0034655	nucleobase-containing compound catabolic process	2.27186e-11	5.26525e-13	270	495
310	UNDER	GO:0043241	protein complex disassembly	2.28564e-11	5.3168e-13	98	241
311	UNDER	GO:0033043	regulation of organelle organization	2.29967e-11	5.36918e-13	537	853
312	UNDER	GO:0072511	divalent inorganic cation transport	2.46462e-11	5.77546e-13	153	326
313	UNDER	GO:0000027	ribosomal large subunit assembly	2.58612e-11	6.08238e-13	70	194
314	UNDER	GO:0021762	substantia nigra development	2.67056e-11	6.3039e-13	21	102
315	UNDER	GO:0070838	divalent metal ion transport	2.89061e-11	6.85805e-13	152	324
316	UNDER	GO:0007186	G-protein coupled receptor signaling pathway	2.89061e-11	6.87296e-13	439	723
317	UNDER	GO:0098763	mitotic cell cycle phase	3.01333e-11	7.1906e-13	2	52
318	UNDER	GO:1903050	regulation of proteolysis involved in cellular protein catabolic process	3.11436e-11	7.45843e-13	83	215
319	UNDER	GO:1902903	regulation of supramolecular fiber organization	4.26015e-11	1.0239e-12	141	306
320	UNDER	GO:0051235	maintenance of location	4.28444e-11	1.03341e-12	102	245
321	UNDER	GO:0009416	response to light stimulus	4.5299e-11	1.09651e-12	85	218
322	UNDER	GO:0003006	developmental process involved in reproduction	5.04054e-11	1.22444e-12	191	379
323	UNDER	GO:0012501	programmed cell death	5.17702e-11	1.26204e-12	637	977
324	UNDER	GO:0031396	regulation of protein ubiquitination	5.56217e-11	1.3607e-12	90	225
325	UNDER	GO:0002682	regulation of immune system process	6.27785e-11	1.54117e-12	272	493
326	UNDER	GO:0022411	cellular component disassembly	6.67007e-11	1.64319e-12	214	411
327	UNDER	GO:0044712	single-organism catabolic process	6.77585e-11	1.67506e-12	687	1039
328	UNDER	GO:0050790	regulation of catalytic activity	7.29541e-11	1.80976e-12	979	1404
329	UNDER	GO:0031331	positive regulation of cellular catabolic process	7.77636e-11	1.93575e-12	92	227
330	UNDER	GO:0071345	cellular response to cytokine stimulus	7.88864e-11	1.97047e-12	121	273
331	UNDER	GO:0010941	regulation of cell death	8.4096e-11	2.10781e-12	508	807
332	UNDER	GO:0033365	protein localization to organelle	8.54361e-11	2.14874e-12	495	790
333	UNDER	GO:0010562	positive regulation of phosphorus metabolic process	1.03185e-10	2.61284e-12	283	506
334	UNDER	GO:0045937	positive regulation of phosphate metabolic process	1.03185e-10	2.61284e-12	283	506
335	UNDER	GO:0009719	response to endogenous stimulus	1.21201e-10	3.07943e-12	405	670
336	UNDER	GO:0051345	positive regulation of hydrolase activity	1.31724e-10	3.35811e-12	280	500
337	UNDER	GO:0006909	phagocytosis	1.51132e-10	3.86586e-12	54	162
338	UNDER	GO:0045087	innate immune response	1.56736e-10	4.02266e-12	113	258
339	UNDER	GO:0044033	multi-organism metabolic process	1.77746e-10	4.57716e-12	71	190
340	UNDER	GO:0009132	nucleoside diphosphate metabolic process	1.96343e-10	5.07291e-12	173	347
341	UNDER	GO:0043624	cellular protein complex disassembly	1.98152e-10	5.15364e-12	88	218
342	UNDER	GO:0044270	cellular nitrogen compound catabolic process	1.98152e-10	5.1367e-12	304	531
343	UNDER	GO:0022403	cell cycle phase	2.31267e-10	6.03478e-12	3	52
344	UNDER	GO:0030901	midbrain development	2.34655e-10	6.14332e-12	35	126
345	UNDER	GO:0098542	defense response to other organism	2.50885e-10	6.58976e-12	80	204
346	UNDER	GO:0022414	reproductive process	2.75865e-10	7.26957e-12	415	678
347	UNDER	GO:0009892	negative regulation of metabolic process	2.82207e-10	7.46093e-12	814	1188
348	UNDER	GO:0010498	proteasomal protein catabolic process	2.94613e-10	7.8142e-12	227	423
349	UNDER	GO:0031401	positive regulation of protein modification process	2.95124e-10	7.85308e-12	337	574
350	UNDER	GO:0071495	cellular response to endogenous stimulus	3.17927e-10	8.48715e-12	298	521
351	UNDER	GO:0032880	regulation of protein localization	3.18926e-10	8.54119e-12	225	420
352	UNDER	GO:0006915	apoptotic process	3.28605e-10	8.82862e-12	621	944
353	UNDER	GO:0003008	system process	3.49881e-10	9.43027e-12	348	588
354	UNDER	GO:0042325	regulation of phosphorylation	3.80733e-10	1.02945e-11	427	692
355	UNDER	GO:0001932	regulation of protein phosphorylation	3.90868e-10	1.06021e-11	390	643
356	UNDER	GO:1903052	positive regulation of proteolysis involved in cellular protein catabolic process	3.97576e-10	1.08182e-11	70	186
357	UNDER	GO:0000087	mitotic M phase	4.17027e-10	1.1419e-11	1	43
358	UNDER	GO:0000279	M phase	4.17027e-10	1.1419e-11	1	43
359	UNDER	GO:0042176	regulation of protein catabolic process	5.20619e-10	1.43003e-11	127	275
360	UNDER	GO:0072594	establishment of protein localization to organelle	5.77408e-10	1.59097e-11	366	609
361	UNDER	GO:0032271	regulation of protein polymerization	5.91624e-10	1.63522e-11	121	266
362	UNDER	GO:0070670	response to interleukin-4	6.03525e-10	1.67847e-11	12	75
363	UNDER	GO:0071353	cellular response to interleukin-4	6.03525e-10	1.67847e-11	12	75
364	UNDER	GO:0009408	response to heat	7.02621e-10	1.96198e-11	44	139
365	UNDER	GO:0040011	locomotion	7.02621e-10	1.96613e-11	451	720
366	UNDER	GO:0031334	positive regulation of protein complex assembly	7.3993e-10	2.07688e-11	130	278
367	UNDER	GO:0000278	mitotic cell cycle	7.82269e-10	2.20244e-11	495	777
368	UNDER	GO:0030832	regulation of actin filament length	8.29641e-10	2.35006e-11	108	244
369	UNDER	GO:0008064	regulation of actin polymerization or depolymerization	8.29641e-10	2.35006e-11	108	244
370	UNDER	GO:0048878	chemical homeostasis	8.96512e-10	2.54717e-11	332	561
371	UNDER	GO:0009266	response to temperature stimulus	9.35765e-10	2.66673e-11	59	165
372	UNDER	GO:0070271	protein complex biogenesis	9.42659e-10	2.71059e-11	605	916
373	UNDER	GO:0009896	positive regulation of catabolic process	9.42659e-10	2.71065e-11	109	245
374	UNDER	GO:0006461	protein complex assembly	9.42659e-10	2.71059e-11	605	916
375	UNDER	GO:0044848	biological phase	9.70805e-10	2.79992e-11	7	61
376	UNDER	GO:1903362	regulation of cellular protein catabolic process	1.07704e-09	3.11555e-11	93	220
377	UNDER	GO:0032075	positive regulation of nuclease activity	1.14521e-09	3.32259e-11	6	58
378	UNDER	GO:0006914	autophagy	1.16277e-09	3.38351e-11	218	404
379	UNDER	GO:0006986	response to unfolded protein	1.24857e-09	3.64389e-11	69	181
380	UNDER	GO:0009314	response to radiation	1.42338e-09	4.16629e-11	141	292
381	UNDER	GO:0043161	proteasome-mediated ubiquitin-dependent protein catabolic process	1.48736e-09	4.36634e-11	215	399
382	UNDER	GO:0030833	regulation of actin filament polymerization	1.77466e-09	5.22497e-11	105	237
383	UNDER	GO:0044702	single organism reproductive process	1.80402e-09	5.3269e-11	379	620
384	UNDER	GO:0006807	nitrogen compound metabolic process	1.82106e-09	5.41061e-11	9497	11105
385	UNDER	GO:0000090	mitotic anaphase	1.82106e-09	5.42409e-11	0	36
386	UNDER	GO:0051322	anaphase	1.82106e-09	5.42409e-11	0	36
387	UNDER	GO:0032956	regulation of actin cytoskeleton organization	1.94871e-09	5.82103e-11	139	288
388	UNDER	GO:0046700	heterocycle catabolic process	1.96141e-09	5.87581e-11	317	537
389	UNDER	GO:0019941	modification-dependent protein catabolic process	2.18966e-09	6.57838e-11	427	682
390	UNDER	GO:0006511	ubiquitin-dependent protein catabolic process	2.26752e-09	6.83176e-11	419	671
391	UNDER	GO:1903364	positive regulation of cellular protein catabolic process	2.27141e-09	6.86297e-11	76	190
392	UNDER	GO:0044703	multi-organism reproductive process	2.31067e-09	7.00142e-11	241	433
393	UNDER	GO:0061136	regulation of proteasomal protein catabolic process	2.47829e-09	7.53058e-11	57	159
394	UNDER	GO:0030041	actin filament polymerization	2.59269e-09	7.90048e-11	108	240
395	UNDER	GO:0006979	response to oxidative stress	2.78576e-09	8.51271e-11	205	382
396	UNDER	GO:0034250	positive regulation of cellular amide metabolic process	3.04685e-09	9.3367e-11	58	160
397	UNDER	GO:0031400	negative regulation of protein modification process	3.37565e-09	1.03732e-10	155	309
398	UNDER	GO:0060341	regulation of cellular localization	3.47614e-09	1.07119e-10	244	435
399	UNDER	GO:0031667	response to nutrient levels	3.75315e-09	1.15977e-10	89	210
400	UNDER	GO:0006605	protein targeting	3.82322e-09	1.1847e-10	384	622
401	UNDER	GO:0032970	regulation of actin filament-based process	3.97688e-09	1.23573e-10	146	296
402	UNDER	GO:0001934	positive regulation of protein phosphorylation	4.0578e-09	1.26436e-10	233	419
403	UNDER	GO:0006165	nucleoside diphosphate phosphorylation	4.06406e-09	1.2698e-10	149	300
404	UNDER	GO:0046939	nucleotide phosphorylation	4.18348e-09	1.3107e-10	163	320
405	UNDER	GO:0060548	negative regulation of cell death	4.43091e-09	1.39203e-10	248	439
406	UNDER	GO:0040035	hermaphrodite genitalia development	4.68141e-09	1.47474e-10	1	39
407	UNDER	GO:0019953	sexual reproduction	4.83122e-09	1.52608e-10	229	413
408	UNDER	GO:0044724	single-organism carbohydrate catabolic process	5.19481e-09	1.64539e-10	157	310
409	UNDER	GO:0070201	regulation of establishment of protein localization	5.19712e-09	1.65059e-10	177	339
410	UNDER	GO:0032984	macromolecular complex disassembly	6.23919e-09	1.9869e-10	120	255
411	UNDER	GO:0032069	regulation of nuclease activity	6.37602e-09	2.03641e-10	8	60
412	UNDER	GO:0045981	positive regulation of nucleotide metabolic process	6.37602e-09	2.04142e-10	17	82
413	UNDER	GO:0052548	regulation of endopeptidase activity	6.66312e-09	2.13906e-10	62	164
414	UNDER	GO:0035966	response to topologically incorrect protein	6.93967e-09	2.2338e-10	81	195
415	UNDER	GO:0010605	negative regulation of macromolecule metabolic process	7.02666e-09	2.26783e-10	771	1110
416	UNDER	GO:0006006	glucose metabolic process	7.72924e-09	2.50122e-10	191	357
417	UNDER	GO:2000026	regulation of multicellular organismal development	8.32648e-09	2.70164e-10	408	649
418	UNDER	GO:0045732	positive regulation of protein catabolic process	9.19217e-09	2.99042e-10	89	206
419	UNDER	GO:0009891	positive regulation of biosynthetic process	9.78028e-09	3.19013e-10	631	933
420	UNDER	GO:0052547	regulation of peptidase activity	1.09451e-08	3.57946e-10	74	182
421	UNDER	GO:0009991	response to extracellular stimulus	1.146e-08	3.77738e-10	95	215
422	UNDER	GO:0048468	cell development	1.146e-08	3.76807e-10	666	976
423	UNDER	GO:0030801	positive regulation of cyclic nucleotide metabolic process	1.16634e-08	3.85444e-10	12	69
424	UNDER	GO:0016236	macroautophagy	1.17727e-08	3.90066e-10	116	247
425	UNDER	GO:1901800	positive regulation of proteasomal protein catabolic process	1.18104e-08	3.92328e-10	42	128
426	UNDER	GO:0080135	regulation of cellular response to stress	1.20836e-08	4.02442e-10	210	382
427	UNDER	GO:0042327	positive regulation of phosphorylation	1.35156e-08	4.51711e-10	260	450
428	UNDER	GO:0007338	single fertilization	1.35156e-08	4.52452e-10	23	92
429	UNDER	GO:0023056	positive regulation of signaling	1.3602e-08	4.56515e-10	403	640
430	UNDER	GO:0010646	regulation of cell communication	1.42704e-08	4.8017e-10	1033	1425
431	UNDER	GO:0048608	reproductive structure development	1.45558e-08	4.91024e-10	70	175
432	UNDER	GO:0010647	positive regulation of cell communication	1.49708e-08	5.06308e-10	401	636
433	UNDER	GO:0043067	regulation of programmed cell death	1.49991e-08	5.08553e-10	477	735
434	UNDER	GO:0031324	negative regulation of cellular metabolic process	1.52195e-08	5.17332e-10	758	1088
435	UNDER	GO:0009967	positive regulation of signal transduction	1.63828e-08	5.59672e-10	368	593
436	UNDER	GO:0042981	regulation of apoptotic process	1.63828e-08	5.59689e-10	470	725
437	UNDER	GO:0002764	immune response-regulating signaling pathway	1.66737e-08	5.71057e-10	98	218
438	UNDER	GO:0019725	cellular homeostasis	1.7634e-08	6.0546e-10	392	624
439	UNDER	GO:0043632	modification-dependent macromolecule catabolic process	1.95178e-08	6.71815e-10	446	693
440	UNDER	GO:0006468	protein phosphorylation	1.97624e-08	6.81929e-10	1226	1655
441	UNDER	GO:0050778	positive regulation of immune response	2.12309e-08	7.34425e-10	114	242
442	UNDER	GO:1903829	positive regulation of cellular protein localization	2.15167e-08	7.48004e-10	91	207
443	UNDER	GO:0051171	regulation of nitrogen compound metabolic process	2.15167e-08	7.476e-10	2548	3209
444	UNDER	GO:0051050	positive regulation of transport	2.18066e-08	7.59956e-10	226	401
445	UNDER	GO:0016072	rRNA metabolic process	2.33083e-08	8.14291e-10	355	574
446	UNDER	GO:0044723	single-organism carbohydrate metabolic process	2.47457e-08	8.67064e-10	463	713
447	UNDER	GO:0002684	positive regulation of immune system process	2.47457e-08	8.68754e-10	170	322
448	UNDER	GO:0009179	purine ribonucleoside diphosphate metabolic process	2.72295e-08	9.60628e-10	137	275
449	UNDER	GO:0009185	ribonucleoside diphosphate metabolic process	2.72295e-08	9.60628e-10	137	275
450	UNDER	GO:0061458	reproductive system development	2.72595e-08	9.64027e-10	72	176
451	UNDER	GO:0051606	detection of stimulus	2.72624e-08	9.66471e-10	76	182
452	UNDER	GO:0023051	regulation of signaling	2.92571e-08	1.0397e-09	1051	1441
453	UNDER	GO:0009135	purine nucleoside diphosphate metabolic process	2.96836e-08	1.0574e-09	138	276
454	UNDER	GO:0031328	positive regulation of cellular biosynthetic process	2.99929e-08	1.07099e-09	620	911
455	UNDER	GO:0046031	ADP metabolic process	3.60149e-08	1.28912e-09	132	266
456	UNDER	GO:0034762	regulation of transmembrane transport	3.63536e-08	1.30436e-09	82	191
457	UNDER	GO:0006364	rRNA processing	3.66555e-08	1.31834e-09	336	546
458	UNDER	GO:0045935	positive regulation of nucleobase-containing compound metabolic process	3.80226e-08	1.37077e-09	618	907
459	UNDER	GO:0002253	activation of immune response	3.81854e-08	1.37992e-09	91	204
460	UNDER	GO:0043666	regulation of phosphoprotein phosphatase activity	3.8286e-08	1.38684e-09	18	79
461	UNDER	GO:0006140	regulation of nucleotide metabolic process	3.84198e-08	1.39498e-09	31	105
462	UNDER	GO:0009966	regulation of signal transduction	3.93354e-08	1.43161e-09	945	1309
463	UNDER	GO:0010803	regulation of tumor necrosis factor-mediated signaling pathway	4.55497e-08	1.66168e-09	11	64
464	UNDER	GO:0042742	defense response to bacterium	4.74686e-08	1.74391e-09	23	89
465	UNDER	GO:0044275	cellular carbohydrate catabolic process	4.74686e-08	1.74391e-09	23	89
466	UNDER	GO:0072593	reactive oxygen species metabolic process	4.74686e-08	1.74367e-09	84	193
467	UNDER	GO:0019439	aromatic compound catabolic process	5.00273e-08	1.84221e-09	335	543
468	UNDER	GO:0051258	protein polymerization	5.29752e-08	1.95531e-09	156	299
469	UNDER	GO:0048585	negative regulation of response to stimulus	5.8816e-08	2.17594e-09	402	629
470	UNDER	GO:0006941	striated muscle contraction	6.18671e-08	2.29413e-09	34	109
471	UNDER	GO:1903827	regulation of cellular protein localization	6.20903e-08	2.30773e-09	155	297
472	UNDER	GO:0010648	negative regulation of cell communication	6.67707e-08	2.48742e-09	355	567
473	UNDER	GO:0061024	membrane organization	6.85914e-08	2.56114e-09	383	604
474	UNDER	GO:0042274	ribosomal small subunit biogenesis	7.36078e-08	2.75651e-09	163	308
475	UNDER	GO:1904951	positive regulation of establishment of protein localization	7.36078e-08	2.76108e-09	101	217
476	UNDER	GO:0006936	muscle contraction	7.67284e-08	2.88473e-09	61	155
477	UNDER	GO:0010035	response to inorganic substance	7.82013e-08	2.94681e-09	149	287
478	UNDER	GO:1901361	organic cyclic compound catabolic process	8.36639e-08	3.15984e-09	352	562
479	UNDER	GO:0023057	negative regulation of signaling	9.46153e-08	3.58158e-09	355	565
480	UNDER	GO:0030433	ER-associated ubiquitin-dependent protein catabolic process	9.5865e-08	3.63711e-09	48	132
481	UNDER	GO:1901700	response to oxygen-containing compound	9.75749e-08	3.71036e-09	347	555
482	UNDER	GO:0002757	immune response-activating signal transduction	9.79759e-08	3.73402e-09	85	192
483	UNDER	GO:2001242	regulation of intrinsic apoptotic signaling pathway	1.01388e-07	3.87277e-09	50	136
484	UNDER	GO:0006096	glycolytic process	1.03063e-07	3.95443e-09	127	255
485	UNDER	GO:0006757	ATP generation from ADP	1.03063e-07	3.95443e-09	127	255
486	UNDER	GO:0016477	cell migration	1.07372e-07	4.15662e-09	290	479
487	UNDER	GO:0043281	regulation of cysteine-type endopeptidase activity involved in apoptotic process	1.07372e-07	4.13708e-09	39	117
488	UNDER	GO:0048806	genitalia development	1.07372e-07	4.14788e-09	7	52
489	UNDER	GO:0042592	homeostatic process	1.07372e-07	4.15554e-09	849	1184
490	UNDER	GO:0045859	regulation of protein kinase activity	1.08611e-07	4.21393e-09	251	427
491	UNDER	GO:0007267	cell-cell signaling	1.15191e-07	4.4791e-09	473	716
492	UNDER	GO:0034765	regulation of ion transmembrane transport	1.17719e-07	4.5875e-09	82	187
493	UNDER	GO:0016192	vesicle-mediated transport	1.19886e-07	4.68226e-09	928	1279
494	UNDER	GO:0007067	mitotic nuclear division	1.28339e-07	5.02342e-09	200	357
495	UNDER	GO:0043280	positive regulation of cysteine-type endopeptidase activity involved in apoptotic process	1.39048e-07	5.45451e-09	19	79
496	UNDER	GO:0006401	RNA catabolic process	1.44657e-07	5.68694e-09	166	309
497	UNDER	GO:0031347	regulation of defense response	1.64044e-07	6.47727e-09	135	264
498	UNDER	GO:2000116	regulation of cysteine-type endopeptidase activity	1.69738e-07	6.71667e-09	41	119
499	UNDER	GO:0002252	immune effector process	1.75858e-07	6.97393e-09	109	226
500	UNDER	GO:0007548	sex differentiation	1.78197e-07	7.082e-09	53	139
501	UNDER	GO:0009617	response to bacterium	1.84672e-07	7.35516e-09	55	142
502	UNDER	GO:0032504	multicellular organism reproduction	1.8545e-07	7.40207e-09	206	363
503	UNDER	GO:0060047	heart contraction	1.99108e-07	7.98141e-09	50	134
504	UNDER	GO:0003015	heart process	1.99108e-07	7.98141e-09	50	134
505	UNDER	GO:0007049	cell cycle	2.11134e-07	8.48163e-09	1012	1375
506	UNDER	GO:0000956	nuclear-transcribed mRNA catabolic process	2.32575e-07	9.36289e-09	139	268
507	UNDER	GO:0003012	muscle system process	2.41052e-07	9.73083e-09	83	186
508	UNDER	GO:1903321	negative regulation of protein modification by small protein conjugation or removal	2.41052e-07	9.74556e-09	32	102
509	UNDER	GO:1902533	positive regulation of intracellular signal transduction	2.47029e-07	1.00084e-08	218	378
510	UNDER	GO:0000302	response to reactive oxygen species	2.48003e-07	1.00691e-08	53	138
511	UNDER	GO:0000028	ribosomal small subunit assembly	2.7638e-07	1.1245e-08	63	154
512	UNDER	GO:0051726	regulation of cell cycle	3.20241e-07	1.3057e-08	521	769
513	UNDER	GO:0030799	regulation of cyclic nucleotide metabolic process	3.33851e-07	1.36406e-08	19	76
514	UNDER	GO:0006730	one-carbon metabolic process	3.48995e-07	1.42893e-08	53	137
515	UNDER	GO:0010468	regulation of gene expression	3.556e-07	1.45903e-08	2443	3049
516	UNDER	GO:0050801	ion homeostasis	3.60224e-07	1.48109e-08	221	380
517	UNDER	GO:0032787	monocarboxylic acid metabolic process	4.16695e-07	1.71685e-08	520	766
518	UNDER	GO:0050879	multicellular organismal movement	4.23896e-07	1.7538e-08	2	35
519	UNDER	GO:0050881	musculoskeletal movement	4.23896e-07	1.7538e-08	2	35
520	UNDER	GO:0045727	positive regulation of translation	4.26086e-07	1.76652e-08	56	141
521	UNDER	GO:2001056	positive regulation of cysteine-type endopeptidase activity	4.47915e-07	1.86471e-08	21	80
522	UNDER	GO:0006090	pyruvate metabolic process	4.47915e-07	1.86336e-08	179	322
523	UNDER	GO:0044092	negative regulation of molecular function	4.48114e-07	1.86938e-08	289	470
524	UNDER	GO:0050776	regulation of immune response	4.83392e-07	2.0207e-08	167	305
525	UNDER	GO:0031397	negative regulation of protein ubiquitination	5.20287e-07	2.1794e-08	32	100
526	UNDER	GO:0051342	regulation of cyclic-nucleotide phosphodiesterase activity	5.22053e-07	2.19128e-08	11	59
527	UNDER	GO:0010628	positive regulation of gene expression	5.41802e-07	2.27882e-08	628	899
528	UNDER	GO:0016051	carbohydrate biosynthetic process	5.62685e-07	2.37308e-08	237	400
529	UNDER	GO:0071496	cellular response to external stimulus	5.62685e-07	2.37632e-08	74	169
530	UNDER	GO:0036503	ERAD pathway	5.74831e-07	2.43255e-08	54	137
531	UNDER	GO:0034614	cellular response to reactive oxygen species	5.84608e-07	2.47894e-08	31	98
532	UNDER	GO:0051260	protein homooligomerization	5.89026e-07	2.50273e-08	68	159
533	UNDER	GO:0043549	regulation of kinase activity	6.64106e-07	2.82744e-08	277	452
534	UNDER	GO:0032434	regulation of proteasomal ubiquitin-dependent protein catabolic process	7.57266e-07	3.23707e-08	35	104
535	UNDER	GO:0009888	tissue development	7.73281e-07	3.31216e-08	652	926
536	UNDER	GO:0007568	aging	7.90379e-07	3.39218e-08	70	161
537	UNDER	GO:1901998	toxin transport	8.369e-07	3.59903e-08	17	70
538	UNDER	GO:0048609	multicellular organismal reproductive process	8.55428e-07	3.68605e-08	200	347
539	UNDER	GO:0019318	hexose metabolic process	8.62555e-07	3.72416e-08	262	431
540	UNDER	GO:0034599	cellular response to oxidative stress	8.84173e-07	3.82509e-08	82	179
541	UNDER	GO:0010952	positive regulation of peptidase activity	8.98946e-07	3.89672e-08	27	89
542	UNDER	GO:0022402	cell cycle process	9.51139e-07	4.13388e-08	724	1012
543	UNDER	GO:0046364	monosaccharide biosynthetic process	9.72774e-07	4.25015e-08	171	307
544	UNDER	GO:1902905	positive regulation of supramolecular fiber organization	1.03395e-06	4.52631e-08	93	195
545	UNDER	GO:0043066	negative regulation of apoptotic process	1.07676e-06	4.72296e-08	223	377
546	UNDER	GO:2000377	regulation of reactive oxygen species metabolic process	1.08439e-06	4.76575e-08	25	85
547	UNDER	GO:0002768	immune response-regulating cell surface receptor signaling pathway	1.19501e-06	5.26213e-08	73	165
548	UNDER	GO:0009566	fertilization	1.23536e-06	5.45041e-08	34	101
549	UNDER	GO:0051343	positive regulation of cyclic-nucleotide phosphodiesterase activity	1.27374e-06	5.63072e-08	10	54
550	UNDER	GO:0044057	regulation of system process	1.28803e-06	5.70494e-08	95	197
551	UNDER	GO:0051223	regulation of protein transport	1.31503e-06	5.83578e-08	159	289
552	UNDER	GO:1903894	regulation of IRE1-mediated unfolded protein response	1.33566e-06	5.95029e-08	2	33
553	UNDER	GO:0044802	single-organism membrane organization	1.34592e-06	6.00755e-08	317	500
554	UNDER	GO:0001666	response to hypoxia	1.40396e-06	6.2907e-08	48	124
555	UNDER	GO:0046677	response to antibiotic	1.40396e-06	6.28445e-08	7	47
556	UNDER	GO:0000272	polysaccharide catabolic process	1.40995e-06	6.33509e-08	30	94
557	UNDER	GO:0031326	regulation of cellular biosynthetic process	1.40995e-06	6.35385e-08	2383	2960
558	UNDER	GO:0006446	regulation of translational initiation	1.40995e-06	6.35223e-08	184	323
559	UNDER	GO:0031669	cellular response to nutrient levels	1.52672e-06	6.89318e-08	62	147
560	UNDER	GO:0042026	protein refolding	1.56613e-06	7.08454e-08	29	91
561	UNDER	GO:0010959	regulation of metal ion transport	1.64459e-06	7.46772e-08	69	157
562	UNDER	GO:0031647	regulation of protein stability	1.67602e-06	7.63921e-08	67	154
563	UNDER	GO:0036293	response to decreased oxygen levels	1.67602e-06	7.63391e-08	49	125
564	UNDER	GO:0009889	regulation of biosynthetic process	1.70676e-06	7.79397e-08	2406	2983
565	UNDER	GO:0051338	regulation of transferase activity	1.71838e-06	7.86178e-08	348	538
566	UNDER	GO:0051261	protein depolymerization	1.76007e-06	8.0676e-08	59	141
567	UNDER	GO:0051094	positive regulation of developmental process	1.81297e-06	8.32567e-08	242	400
568	UNDER	GO:0044247	cellular polysaccharide catabolic process	1.85589e-06	8.57056e-08	18	70
569	UNDER	GO:0009251	glucan catabolic process	1.85589e-06	8.57056e-08	18	70
570	UNDER	GO:0010942	positive regulation of cell death	1.88527e-06	8.72241e-08	175	309
571	UNDER	GO:0030097	hemopoiesis	1.96876e-06	9.12559e-08	216	365
572	UNDER	GO:0070482	response to oxygen levels	1.9868e-06	9.22627e-08	50	126
573	UNDER	GO:1904062	regulation of cation transmembrane transport	2.15206e-06	1.00122e-07	45	118
574	UNDER	GO:0090559	regulation of membrane permeability	2.16234e-06	1.00786e-07	12	58
575	UNDER	GO:0035304	regulation of protein dephosphorylation	2.27113e-06	1.06051e-07	32	96
576	UNDER	GO:0043069	negative regulation of programmed cell death	2.28823e-06	1.07242e-07	231	384
577	UNDER	GO:0048534	hematopoietic or lymphoid organ development	2.28823e-06	1.07242e-07	231	384
578	UNDER	GO:0006094	gluconeogenesis	2.31466e-06	1.08879e-07	168	299
579	UNDER	GO:0019319	hexose biosynthetic process	2.31466e-06	1.08879e-07	168	299
580	UNDER	GO:0019646	aerobic electron transport chain	2.32191e-06	1.09419e-07	2	32
581	UNDER	GO:0034641	cellular nitrogen compound metabolic process	2.35723e-06	1.11286e-07	8466	9786
582	UNDER	GO:0010639	negative regulation of organelle organization	2.54906e-06	1.20561e-07	116	225
583	UNDER	GO:0006402	mRNA catabolic process	2.58498e-06	1.22481e-07	153	277
584	UNDER	GO:0044770	cell cycle phase transition	2.59916e-06	1.23599e-07	214	360
585	UNDER	GO:0045010	actin nucleation	2.76998e-06	1.3196e-07	56	135
586	UNDER	GO:0008406	gonad development	2.77048e-06	1.32222e-07	41	111
587	UNDER	GO:0010950	positive regulation of endopeptidase activity	2.77062e-06	1.32467e-07	27	86
588	UNDER	GO:0032273	positive regulation of protein polymerization	2.78737e-06	1.33507e-07	85	179
589	UNDER	GO:0033209	tumor necrosis factor-mediated signaling pathway	2.82778e-06	1.35685e-07	33	97
590	UNDER	GO:0009968	negative regulation of signal transduction	2.88942e-06	1.38891e-07	335	518
591	UNDER	GO:0007276	gamete generation	2.91514e-06	1.40377e-07	172	303
592	UNDER	GO:0045185	maintenance of protein location	3.04462e-06	1.47135e-07	47	120
593	UNDER	GO:0009187	cyclic nucleotide metabolic process	3.23707e-06	1.56713e-07	53	130
594	UNDER	GO:0022412	cellular process involved in reproduction in multicellular organism	3.35378e-06	1.62651e-07	97	197
595	UNDER	GO:0001709	cell fate determination	3.35404e-06	1.62952e-07	1	28
596	UNDER	GO:0007167	enzyme linked receptor protein signaling pathway	3.35829e-06	1.63446e-07	325	504
597	UNDER	GO:1902580	single-organism cellular localization	3.60203e-06	1.75618e-07	460	675
598	UNDER	GO:0030838	positive regulation of actin filament polymerization	3.61169e-06	1.76399e-07	73	160
599	UNDER	GO:0038093	Fc receptor signaling pathway	3.77258e-06	1.84581e-07	54	131
600	UNDER	GO:0051674	localization of cell	3.95609e-06	1.94239e-07	360	548
601	UNDER	GO:0048870	cell motility	3.95609e-06	1.94239e-07	360	548
602	UNDER	GO:0030245	cellulose catabolic process	4.05657e-06	1.99869e-07	3	34
603	UNDER	GO:0051275	beta-glucan catabolic process	4.05657e-06	1.99869e-07	3	34
604	UNDER	GO:0010557	positive regulation of macromolecule biosynthetic process	4.06467e-06	2.00836e-07	596	843
605	UNDER	GO:0003009	skeletal muscle contraction	4.06467e-06	2.00966e-07	2	31
606	UNDER	GO:0030030	cell projection organization	4.14068e-06	2.05079e-07	514	741
607	UNDER	GO:0060048	cardiac muscle contraction	4.14351e-06	2.05575e-07	30	90
608	UNDER	GO:0007281	germ cell development	4.36706e-06	2.17041e-07	92	188
609	UNDER	GO:0009615	response to virus	4.58861e-06	2.28446e-07	75	163
610	UNDER	GO:0045137	development of primary sexual characteristics	4.63243e-06	2.31025e-07	42	111
611	UNDER	GO:0044772	mitotic cell cycle phase transition	4.76806e-06	2.38199e-07	211	353
612	UNDER	GO:0008015	blood circulation	5.02292e-06	2.51793e-07	107	209
613	UNDER	GO:0003013	circulatory system process	5.02292e-06	2.51793e-07	107	209
614	UNDER	GO:0040019	positive regulation of embryonic development	5.0378e-06	2.52971e-07	10	51
615	UNDER	GO:1900034	regulation of cellular response to heat	5.34209e-06	2.68709e-07	12	56
616	UNDER	GO:0016337	single organismal cell-cell adhesion	5.4468e-06	2.74444e-07	65	147
617	UNDER	GO:0034620	cellular response to unfolded protein	5.78964e-06	2.92215e-07	59	137
618	UNDER	GO:0007052	mitotic spindle organization	5.88567e-06	2.98072e-07	49	121
619	UNDER	GO:1902850	microtubule cytoskeleton organization involved in mitosis	5.88567e-06	2.98072e-07	49	121
620	UNDER	GO:0030003	cellular cation homeostasis	5.92345e-06	3.00494e-07	163	287
621	UNDER	GO:0006942	regulation of striated muscle contraction	5.93963e-06	3.02845e-07	19	69
622	UNDER	GO:0031668	cellular response to extracellular stimulus	5.93963e-06	3.02294e-07	68	151
623	UNDER	GO:0050821	protein stabilization	5.93963e-06	3.02813e-07	30	89
624	UNDER	GO:0051259	protein oligomerization	6.0726e-06	3.10146e-07	121	228
625	UNDER	GO:0042594	response to starvation	6.63789e-06	3.39586e-07	60	138
626	UNDER	GO:0045089	positive regulation of innate immune response	7.00088e-06	3.58911e-07	67	149
627	UNDER	GO:1903522	regulation of blood circulation	7.00088e-06	3.59359e-07	52	125
628	UNDER	GO:0098602	single organism cell adhesion	7.05511e-06	3.62748e-07	89	182
629	UNDER	GO:0006665	sphingolipid metabolic process	7.12739e-06	3.67076e-07	79	167
630	UNDER	GO:0010638	positive regulation of organelle organization	7.31357e-06	3.77292e-07	286	449
631	UNDER	GO:0090662	ATP hydrolysis coupled transmembrane transport	7.51598e-06	3.89024e-07	87	179
632	UNDER	GO:0006937	regulation of muscle contraction	7.51598e-06	3.88714e-07	28	85
633	UNDER	GO:0055082	cellular chemical homeostasis	7.60619e-06	3.94347e-07	217	358
634	UNDER	GO:0030968	endoplasmic reticulum unfolded protein response	7.86853e-06	4.08623e-07	57	133
635	UNDER	GO:1905710	positive regulation of membrane permeability	7.98378e-06	4.15294e-07	10	50
636	UNDER	GO:0008016	regulation of heart contraction	8.07539e-06	4.20752e-07	38	102
637	UNDER	GO:0043068	positive regulation of programmed cell death	8.39701e-06	4.3823e-07	169	293
638	UNDER	GO:1905475	regulation of protein localization to membrane	8.51147e-06	4.44934e-07	30	88
639	UNDER	GO:0055080	cation homeostasis	8.70416e-06	4.55754e-07	196	330
640	UNDER	GO:0002429	immune response-activating cell surface receptor signaling pathway	8.86084e-06	4.64719e-07	60	137
641	UNDER	GO:0006898	receptor-mediated endocytosis	8.89215e-06	4.67124e-07	111	213
642	UNDER	GO:0051924	regulation of calcium ion transport	9.20188e-06	4.84185e-07	46	115
643	UNDER	GO:0035567	non-canonical Wnt signaling pathway	9.45237e-06	4.98176e-07	52	124
644	UNDER	GO:0061684	chaperone-mediated autophagy	1.00557e-05	5.317e-07	7	43
645	UNDER	GO:0060759	regulation of response to cytokine stimulus	1.07982e-05	5.71889e-07	31	89
646	UNDER	GO:0001959	regulation of cytokine-mediated signaling pathway	1.08229e-05	5.75053e-07	28	84
647	UNDER	GO:0045860	positive regulation of protein kinase activity	1.08229e-05	5.74557e-07	142	255
648	UNDER	GO:0090257	regulation of muscle system process	1.08375e-05	5.76758e-07	47	116
649	UNDER	GO:0051495	positive regulation of cytoskeleton organization	1.11741e-05	5.96594e-07	108	207
650	UNDER	GO:0010921	regulation of phosphatase activity	1.16198e-05	6.21387e-07	33	93
651	UNDER	GO:0002262	myeloid cell homeostasis	1.18437e-05	6.34376e-07	40	104
652	UNDER	GO:0001816	cytokine production	1.18884e-05	6.37792e-07	103	200
653	UNDER	GO:0015988	energy coupled proton transmembrane transport, against electrochemical gradient	1.1918e-05	6.4347e-07	84	172
654	UNDER	GO:0099131	ATP hydrolysis coupled ion transmembrane transport	1.1918e-05	6.4347e-07	84	172
655	UNDER	GO:0015991	ATP hydrolysis coupled proton transport	1.1918e-05	6.4347e-07	84	172
656	UNDER	GO:0099132	ATP hydrolysis coupled cation transmembrane transport	1.1918e-05	6.4347e-07	84	172
657	UNDER	GO:0098771	inorganic ion homeostasis	1.20485e-05	6.51549e-07	203	337
658	UNDER	GO:1903322	positive regulation of protein modification by small protein conjugation or removal	1.21368e-05	6.57364e-07	67	147
659	UNDER	GO:1900544	positive regulation of purine nucleotide metabolic process	1.25443e-05	6.80514e-07	13	56
660	UNDER	GO:0005996	monosaccharide metabolic process	1.28078e-05	6.95911e-07	293	455
661	UNDER	GO:0035967	cellular response to topologically incorrect protein	1.30694e-05	7.11245e-07	70	151
662	UNDER	GO:0030042	actin filament depolymerization	1.46294e-05	7.97396e-07	43	109
663	UNDER	GO:0006873	cellular ion homeostasis	1.46797e-05	8.01401e-07	172	295
664	UNDER	GO:0046496	nicotinamide nucleotide metabolic process	1.53922e-05	8.41616e-07	238	382
665	UNDER	GO:0042542	response to hydrogen peroxide	1.5493e-05	8.48455e-07	28	83
666	UNDER	GO:0010556	regulation of macromolecule biosynthetic process	1.68821e-05	9.2598e-07	2344	2877
667	UNDER	GO:0009725	response to hormone	1.87861e-05	1.03203e-06	169	289
668	UNDER	GO:0043488	regulation of mRNA stability	1.9169e-05	1.05635e-06	32	90
669	UNDER	GO:0009887	animal organ morphogenesis	1.9169e-05	1.05588e-06	374	555
670	UNDER	GO:0021577	hindbrain structural organization	1.97317e-05	1.09075e-06	1	25
671	UNDER	GO:0021589	cerebellum structural organization	1.97317e-05	1.09075e-06	1	25
672	UNDER	GO:0000280	nuclear division	2.0317e-05	1.12484e-06	307	470
673	UNDER	GO:0032507	maintenance of protein location in cell	2.032e-05	1.12676e-06	45	111
674	UNDER	GO:0033135	regulation of peptidyl-serine phosphorylation	2.05467e-05	1.14109e-06	12	52
675	UNDER	GO:2000112	regulation of cellular macromolecule biosynthetic process	2.10603e-05	1.17142e-06	2321	2847
676	UNDER	GO:1900101	regulation of endoplasmic reticulum unfolded protein response	2.15432e-05	1.20013e-06	18	64
677	UNDER	GO:0036500	ATF6-mediated unfolded protein response	2.16507e-05	1.20798e-06	0	21
678	UNDER	GO:0071356	cellular response to tumor necrosis factor	2.27446e-05	1.27487e-06	40	102
679	UNDER	GO:0006813	potassium ion transport	2.27446e-05	1.27322e-06	111	208
680	UNDER	GO:0043065	positive regulation of apoptotic process	2.27446e-05	1.2746e-06	169	288
681	UNDER	GO:0043487	regulation of RNA stability	2.33163e-05	1.30891e-06	33	91
682	UNDER	GO:0015976	carbon utilization	2.36869e-05	1.33176e-06	46	112
683	UNDER	GO:0051494	negative regulation of cytoskeleton organization	2.37015e-05	1.33461e-06	44	109
684	UNDER	GO:0043086	negative regulation of catalytic activity	2.39943e-05	1.35316e-06	210	343
685	UNDER	GO:0006122	mitochondrial electron transport, ubiquinol to cytochrome c	2.50193e-05	1.41311e-06	16	60
686	UNDER	GO:0007051	spindle organization	2.58148e-05	1.46025e-06	95	185
687	UNDER	GO:0032436	positive regulation of proteasomal ubiquitin-dependent protein catabolic process	2.69114e-05	1.52668e-06	32	88
688	UNDER	GO:0019068	virion assembly	2.69114e-05	1.5269e-06	20	67
689	UNDER	GO:0002520	immune system development	2.82624e-05	1.60598e-06	254	399
690	UNDER	GO:0051273	beta-glucan metabolic process	2.84024e-05	1.61882e-06	4	34
691	UNDER	GO:0030243	cellulose metabolic process	2.84024e-05	1.61882e-06	4	34
692	UNDER	GO:0043269	regulation of ion transport	2.84084e-05	1.62403e-06	144	253
693	UNDER	GO:0031349	positive regulation of defense response	2.84084e-05	1.62222e-06	77	159
694	UNDER	GO:0097193	intrinsic apoptotic signaling pathway	2.98827e-05	1.71088e-06	118	217
695	UNDER	GO:0018193	peptidyl-amino acid modification	3.0165e-05	1.72963e-06	668	913
696	UNDER	GO:0031398	positive regulation of protein ubiquitination	3.05717e-05	1.75557e-06	63	137
697	UNDER	GO:2001233	regulation of apoptotic signaling pathway	3.06838e-05	1.76465e-06	112	209
698	UNDER	GO:0051098	regulation of binding	3.12636e-05	1.80068e-06	78	160
699	UNDER	GO:0002431	Fc receptor mediated stimulatory signaling pathway	3.17046e-05	1.8288e-06	11	49
700	UNDER	GO:0006022	aminoglycan metabolic process	3.21838e-05	1.8592e-06	157	270
701	UNDER	GO:0017015	regulation of transforming growth factor beta receptor signaling pathway	3.23447e-05	1.87672e-06	22	70
702	UNDER	GO:1903844	regulation of cellular response to transforming growth factor beta stimulus	3.23447e-05	1.87672e-06	22	70
703	UNDER	GO:0071453	cellular response to oxygen levels	3.23447e-05	1.87683e-06	25	76
704	UNDER	GO:0002218	activation of innate immune response	3.38523e-05	1.96721e-06	57	128
705	UNDER	GO:0000022	mitotic spindle elongation	3.41988e-05	1.99028e-06	5	36
706	UNDER	GO:1903409	reactive oxygen species biosynthetic process	3.4626e-05	2.01812e-06	17	61
707	UNDER	GO:0034101	erythrocyte homeostasis	3.49875e-05	2.04519e-06	37	96
708	UNDER	GO:0071287	cellular response to manganese ion	3.50665e-05	2.05282e-06	1	24
709	UNDER	GO:0051336	regulation of hydrolase activity	3.59489e-05	2.10756e-06	591	818
710	UNDER	GO:0071456	cellular response to hypoxia	3.66483e-05	2.15171e-06	24	74
711	UNDER	GO:1902904	negative regulation of supramolecular fiber organization	3.70492e-05	2.17843e-06	47	112
712	UNDER	GO:0034612	response to tumor necrosis factor	3.74918e-05	2.21089e-06	43	105
713	UNDER	GO:0045088	regulation of innate immune response	3.74918e-05	2.21029e-06	80	162
714	UNDER	GO:0033674	positive regulation of kinase activity	3.86758e-05	2.28403e-06	172	289
715	UNDER	GO:1903891	regulation of ATF6-mediated unfolded protein response	3.98878e-05	2.36588e-06	0	20
716	UNDER	GO:0060904	regulation of protein folding in endoplasmic reticulum	3.98878e-05	2.36588e-06	0	20
717	UNDER	GO:0090074	negative regulation of protein homodimerization activity	3.98878e-05	2.36588e-06	0	20
718	UNDER	GO:0009581	detection of external stimulus	4.04177e-05	2.40078e-06	36	94
719	UNDER	GO:0051222	positive regulation of protein transport	4.05006e-05	2.40918e-06	89	175
720	UNDER	GO:0032870	cellular response to hormone stimulus	4.06096e-05	2.41915e-06	126	227
721	UNDER	GO:0048729	Tissue morphogenesis	4.07185e-05	2.42913e-06	270	417
722	UNDER	GO:0009267	cellular response to starvation	4.47856e-05	2.6756e-06	57	127
723	UNDER	GO:0009409	response to cold	4.60126e-05	2.75286e-06	8	42
724	UNDER	GO:0036294	cellular response to decreased oxygen levels	4.64552e-05	2.78332e-06	25	75
725	UNDER	GO:0007399	nervous system development	4.67809e-05	2.80686e-06	834	1107
726	UNDER	GO:0008037	cell recognition	4.69775e-05	2.82672e-06	18	62
727	UNDER	GO:0055117	regulation of cardiac muscle contraction	4.69775e-05	2.82672e-06	18	62
728	UNDER	GO:0036498	IRE1-mediated unfolded protein response	4.80799e-05	2.89718e-06	12	50
729	UNDER	GO:0038094	Fc-gamma receptor signaling pathway	4.84513e-05	2.93203e-06	10	46
730	UNDER	GO:0002433	immune response-regulating cell surface receptor signaling pathway involved in phagocytosis	4.84513e-05	2.93203e-06	10	46
731	UNDER	GO:0038096	Fc-gamma receptor signaling pathway involved in phagocytosis	4.84513e-05	2.93203e-06	10	46
732	UNDER	GO:0031333	negative regulation of protein complex assembly	5.00908e-05	3.03555e-06	41	101
733	UNDER	GO:0008637	apoptotic mitochondrial changes	5.2782e-05	3.20317e-06	24	73
734	UNDER	GO:0090092	regulation of transmembrane receptor protein serine/threonine kinase signaling pathway	5.43253e-05	3.30148e-06	54	121
735	UNDER	GO:0070509	calcium ion import	5.55099e-05	3.38301e-06	29	81
736	UNDER	GO:0035725	sodium ion transmembrane transport	5.55099e-05	3.38301e-06	29	81
737	UNDER	GO:0048285	organelle fission	5.7834e-05	3.52961e-06	323	483
738	UNDER	GO:0045595	regulation of cell differentiation	5.91085e-05	3.61247e-06	346	511
739	UNDER	GO:0007420	brain development	5.91508e-05	3.62521e-06	257	398
740	UNDER	GO:0040012	regulation of locomotion	5.91508e-05	3.62017e-06	173	288
741	UNDER	GO:1902806	regulation of cell cycle G1/S phase transition	5.94242e-05	3.64706e-06	44	106
742	UNDER	GO:0032989	cellular component morphogenesis	5.96724e-05	3.66742e-06	341	505
743	UNDER	GO:0008277	regulation of G-protein coupled receptor protein signaling pathway	6.06073e-05	3.73008e-06	15	56
744	UNDER	GO:1990440	positive regulation of transcription from RNA polymerase II promoter in response to endoplasmic reticulum stress	6.26368e-05	3.86036e-06	1	23
745	UNDER	GO:0006672	ceramide metabolic process	6.30199e-05	3.88938e-06	19	63
746	UNDER	GO:0007006	mitochondrial membrane organization	6.33375e-05	3.91442e-06	33	87
747	UNDER	GO:0007600	sensory perception	6.54898e-05	4.05306e-06	89	172
748	UNDER	GO:0009582	detection of abiotic stimulus	6.64259e-05	4.1167e-06	37	94
749	UNDER	GO:0014070	response to organic cyclic compound	6.72746e-05	4.17507e-06	180	297
750	UNDER	GO:0044839	cell cycle G2/M phase transition	6.75196e-05	4.19607e-06	81	161
751	UNDER	GO:0001775	cell activation	6.76643e-05	4.21087e-06	114	208
752	UNDER	GO:0044773	mitotic DNA damage checkpoint	6.87962e-05	4.28721e-06	43	103
753	UNDER	GO:0006826	iron ion transport	6.89047e-05	4.31763e-06	18	61
754	UNDER	GO:0051231	spindle elongation	6.89047e-05	4.30956e-06	7	39
755	UNDER	GO:1903845	negative regulation of cellular response to transforming growth factor beta stimulus	6.89047e-05	4.31763e-06	18	61
756	UNDER	GO:0030512	negative regulation of transforming growth factor beta receptor signaling pathway	6.89047e-05	4.31763e-06	18	61
757	UNDER	GO:0010948	negative regulation of cell cycle process	6.94945e-05	4.36056e-06	87	169
758	UNDER	GO:0002758	innate immune response-activating signal transduction	7.13844e-05	4.48527e-06	54	120
759	UNDER	GO:0010922	positive regulation of phosphatase activity	7.23803e-05	4.56027e-06	8	41
760	UNDER	GO:0070841	inclusion body assembly	7.23803e-05	4.56027e-06	8	41
761	UNDER	GO:0050999	regulation of nitric-oxide synthase activity	7.42285e-05	4.7022e-06	11	47
762	UNDER	GO:0051208	sequestering of calcium ion	7.42285e-05	4.69887e-06	21	66
763	UNDER	GO:0046902	regulation of mitochondrial membrane permeability	7.42285e-05	4.7022e-06	11	47
764	UNDER	GO:1902882	regulation of response to oxidative stress	7.42285e-05	4.69887e-06	21	66
765	UNDER	GO:0044711	single-organism biosynthetic process	7.6574e-05	4.85735e-06	1416	1785
766	UNDER	GO:2000045	regulation of G1/S transition of mitotic cell cycle	7.98493e-05	5.07197e-06	44	105
767	UNDER	GO:0007417	central nervous system development	8.10756e-05	5.15683e-06	331	490
768	UNDER	GO:0022603	regulation of anatomical structure morphogenesis	8.27894e-05	5.27294e-06	253	391
769	UNDER	GO:0030334	regulation of cell migration	8.54064e-05	5.44695e-06	135	235
770	UNDER	GO:0072659	protein localization to plasma membrane	8.71928e-05	5.56836e-06	58	126
771	UNDER	GO:0051347	positive regulation of transferase activity	8.76004e-05	5.60191e-06	226	356
772	UNDER	GO:0006928	movement of cell or subcellular component	9.03885e-05	5.78797e-06	729	975
773	UNDER	GO:0007009	plasma membrane organization	9.25739e-05	5.93585e-06	79	157
774	UNDER	GO:0034314	Arp2/3 complex-mediated actin nucleation	9.76157e-05	6.26751e-06	52	116
775	UNDER	GO:0019221	cytokine-mediated signaling pathway	9.90018e-05	6.36501e-06	77	153
776	UNDER	GO:1990778	protein localization to cell periphery	9.91919e-05	6.38575e-06	64	134
777	UNDER	GO:2000114	regulation of establishment of cell polarity	0.00010023	6.46118e-06	3	28
778	UNDER	GO:0048872	homeostasis of number of cells	0.000100954	6.51653e-06	80	158
779	UNDER	GO:0018208	peptidyl-proline modification	0.000101952	6.59655e-06	83	162
780	UNDER	GO:1900542	regulation of purine nucleotide metabolic process	0.000101952	6.59846e-06	27	76
781	UNDER	GO:1901698	response to nitrogen compound	0.00010457	6.77686e-06	199	319
782	UNDER	GO:0070848	response to growth factor	0.000107078	6.95775e-06	191	309
783	UNDER	GO:1900182	positive regulation of protein localization to nucleus	0.000107879	7.01909e-06	21	65
784	UNDER	GO:2000134	negative regulation of G1/S transition of mitotic cell cycle	0.0001087	7.09118e-06	29	79
785	UNDER	GO:1902807	negative regulation of cell cycle G1/S phase transition	0.0001087	7.09118e-06	29	79
786	UNDER	GO:0000086	G2/M transition of mitotic cell cycle	0.000109396	7.14596e-06	81	159
787	UNDER	GO:1903332	regulation of protein folding	0.000110305	7.21478e-06	7	38
788	UNDER	GO:0051651	maintenance of location in cell	0.000113354	7.42394e-06	51	114
789	UNDER	GO:0055065	metal ion homeostasis	0.00011352	7.44456e-06	144	246
790	UNDER	GO:0051046	regulation of secretion	0.000116284	7.64068e-06	106	194
791	UNDER	GO:0030148	sphingolipid biosynthetic process	0.000116284	7.64579e-06	10	44
792	UNDER	GO:0036473	cell death in response to oxidative stress	0.000119722	7.90269e-06	20	63
793	UNDER	GO:1900407	regulation of cellular response to oxidative stress	0.000119722	7.90269e-06	20	63
794	UNDER	GO:1905477	positive regulation of protein localization to membrane	0.000119722	7.90269e-06	20	63
795	UNDER	GO:0043618	regulation of transcription from RNA polymerase II promoter in response to stress	0.000124754	8.24554e-06	28	77
796	UNDER	GO:0032637	interleukin-8 production	0.000132717	8.78327e-06	4	30
797	UNDER	GO:2001057	reactive nitrogen species metabolic process	0.000133732	8.88487e-06	19	61
798	UNDER	GO:1903201	regulation of oxidative stress-induced cell death	0.000133732	8.88487e-06	19	61
799	UNDER	GO:0060429	epithelium development	0.000133732	8.86363e-06	433	613
800	UNDER	GO:0009651	response to salt stress	0.000133739	8.89682e-06	4	31
801	UNDER	GO:0032768	regulation of monooxygenase activity	0.000135256	9.00933e-06	15	54
802	UNDER	GO:0046903	secretion	0.000138856	9.26102e-06	313	464
803	UNDER	GO:1901701	cellular response to oxygen-containing compound	0.00014516	9.69397e-06	217	341
804	UNDER	GO:0035303	regulation of dephosphorylation	0.000145464	9.72675e-06	53	116
805	UNDER	GO:0051282	regulation of sequestering of calcium ion	0.000155692	1.04507e-05	21	64
806	UNDER	GO:0051209	release of sequestered calcium ion into cytosol	0.000155692	1.04507e-05	21	64
807	UNDER	GO:0051283	negative regulation of sequestering of calcium ion	0.000155692	1.04507e-05	21	64
808	UNDER	GO:0071363	cellular response to growth factor stimulus	0.000160883	1.08265e-05	188	303
809	UNDER	GO:0072524	pyridine-containing compound metabolic process	0.000160883	1.08268e-05	291	435
810	UNDER	GO:0007033	vacuole organization	0.000164065	1.1055e-05	125	218
811	UNDER	GO:0044783	G1 DNA damage checkpoint	0.000165309	1.11814e-05	26	73
812	UNDER	GO:0044819	mitotic G1/S transition checkpoint	0.000165309	1.11814e-05	26	73
813	UNDER	GO:0031571	mitotic G1 DNA damage checkpoint	0.000165309	1.11814e-05	26	73
814	UNDER	GO:0033137	negative regulation of peptidyl-serine phosphorylation	0.000168949	1.14421e-05	3	27
815	UNDER	GO:0022898	regulation of transmembrane transporter activity	0.000169276	1.14933e-05	39	94
816	UNDER	GO:1903169	regulation of calcium ion transmembrane transport	0.000169276	1.14856e-05	35	88
817	UNDER	GO:0006629	lipid metabolic process	0.000172474	1.17252e-05	919	1193
818	UNDER	GO:0033993	response to lipid	0.000174939	1.19079e-05	141	240
819	UNDER	GO:0097345	mitochondrial outer membrane permeabilization	0.00017594	1.20364e-05	7	37
820	UNDER	GO:1902108	regulation of mitochondrial membrane permeability involved in apoptotic process	0.00017594	1.20364e-05	7	37
821	UNDER	GO:1902110	positive regulation of mitochondrial membrane permeability involved in apoptotic process	0.00017594	1.20364e-05	7	37
822	UNDER	GO:1902686	mitochondrial outer membrane permeabilization involved in programmed cell death	0.00017594	1.20364e-05	7	37
823	UNDER	GO:0032516	positive regulation of phosphoprotein phosphatase activity	0.000180842	1.23873e-05	8	39
824	UNDER	GO:0035794	positive regulation of mitochondrial membrane permeability	0.000181563	1.24523e-05	9	41
825	UNDER	GO:0032101	regulation of response to external stimulus	0.000196274	1.34949e-05	132	227
826	UNDER	GO:0000041	transition metal ion transport	0.000196274	1.34921e-05	58	123
827	UNDER	GO:0090131	mesenchyme migration	0.000197262	1.36136e-05	1	21
828	UNDER	GO:0030240	skeletal muscle thin filament assembly	0.000197262	1.36136e-05	1	21
829	UNDER	GO:0014866	skeletal myofibril assembly	0.000197262	1.35977e-05	2	24
830	UNDER	GO:0043467	regulation of generation of precursor metabolites and energy	0.000201273	1.3925e-05	15	53
831	UNDER	GO:1903530	regulation of secretion by cell	0.000201273	1.39205e-05	98	180
832	UNDER	GO:0010564	regulation of cell cycle process	0.000201531	1.39601e-05	278	417
833	UNDER	GO:1905114	cell surface receptor signaling pathway involved in cell-cell signaling	0.000204091	1.4155e-05	237	364
834	UNDER	GO:1901988	negative regulation of cell cycle phase transition	0.000214787	1.49152e-05	64	131
835	UNDER	GO:1901136	carbohydrate derivative catabolic process	0.000217142	1.50974e-05	109	195
836	UNDER	GO:0051898	negative regulation of protein kinase B signaling	0.000218307	1.51972e-05	4	29
837	UNDER	GO:0030218	erythrocyte differentiation	0.00022813	1.59006e-05	33	83
838	UNDER	GO:0032412	regulation of ion transmembrane transporter activity	0.000229234	1.59972e-05	39	93
839	UNDER	GO:0007005	mitochondrion organization	0.00023493	1.64149e-05	289	430
840	UNDER	GO:0045861	negative regulation of proteolysis	0.000242132	1.69557e-05	48	107
841	UNDER	GO:0097190	apoptotic signaling pathway	0.000242132	1.69596e-05	181	291
842	UNDER	GO:0043627	response to estrogen	0.000252569	1.77123e-05	5	32
843	UNDER	GO:0043393	regulation of protein binding	0.00025565	1.79503e-05	30	78
844	UNDER	GO:0000165	MAPK cascade	0.000261328	1.83939e-05	220	341
845	UNDER	GO:0009060	aerobic respiration	0.000261328	1.83939e-05	220	341
846	UNDER	GO:0036297	interstrand cross-link repair	0.00027897	1.96596e-05	10	42
847	UNDER	GO:0097553	calcium ion transmembrane import into cytosol	0.00028412	2.00713e-05	22	64
848	UNDER	GO:1902656	calcium ion import into cytosol	0.00028412	2.00713e-05	22	64
849	UNDER	GO:0006984	ER-nucleus signaling pathway	0.000284993	2.01575e-05	9	40
850	UNDER	GO:0006734	NADH metabolic process	0.000285378	2.02092e-05	3	26
851	UNDER	GO:0006839	mitochondrial transport	0.000287518	2.03854e-05	117	205
852	UNDER	GO:1901987	regulation of cell cycle phase transition	0.000298435	2.1185e-05	140	236
853	UNDER	GO:2000027	regulation of organ morphogenesis	0.000319597	2.27147e-05	68	135
854	UNDER	GO:1901991	negative regulation of mitotic cell cycle phase transition	0.000328584	2.33816e-05	63	128
855	UNDER	GO:0034605	cellular response to heat	0.000330765	2.35652e-05	26	71
856	UNDER	GO:2000543	positive regulation of gastrulation	0.000345214	2.46471e-05	2	23
857	UNDER	GO:0010951	negative regulation of endopeptidase activity	0.000345214	2.46539e-05	28	74
858	UNDER	GO:0043620	regulation of DNA-templated transcription in response to stress	0.000357389	2.55541e-05	30	77
859	UNDER	GO:1902402	signal transduction involved in mitotic DNA damage checkpoint	0.000357578	2.56596e-05	23	65
860	UNDER	GO:0072413	signal transduction involved in mitotic cell cycle checkpoint	0.000357578	2.56596e-05	23	65
861	UNDER	GO:1902403	signal transduction involved in mitotic DNA integrity checkpoint	0.000357578	2.56596e-05	23	65
862	UNDER	GO:0043244	regulation of protein complex disassembly	0.000361234	2.59531e-05	64	129
863	UNDER	GO:0046209	nitric oxide metabolic process	0.000363927	2.61777e-05	13	47
864	UNDER	GO:0071428	rRNA-containing ribonucleoprotein complex export from nucleus	0.000364804	2.62722e-05	32	80
865	UNDER	GO:0032272	negative regulation of protein polymerization	0.000365455	2.63504e-05	38	90
866	UNDER	GO:2000145	regulation of cell motility	0.000372482	2.68891e-05	157	257
867	UNDER	GO:0030100	regulation of endocytosis	0.000384343	2.77783e-05	73	142
868	UNDER	GO:0009988	cell-cell recognition	0.000387496	2.80709e-05	12	45
869	UNDER	GO:0009611	response to wounding	0.000387496	2.80727e-05	108	191
870	UNDER	GO:0008283	cell proliferation	0.000398294	2.88891e-05	454	629
871	UNDER	GO:0060322	head development	0.000399313	2.89973e-05	276	409
872	UNDER	GO:0007339	binding of sperm to zona pellucida	0.000408805	2.9827e-05	11	43
873	UNDER	GO:0035036	sperm-egg recognition	0.000408805	2.9827e-05	11	43
874	UNDER	GO:0048749	compound eye development	0.000408805	2.9827e-05	11	43
875	UNDER	GO:0030031	cell projection assembly	0.000408805	2.98232e-05	224	343
876	UNDER	GO:0006875	cellular metal ion homeostasis	0.000411499	3.00589e-05	135	227
877	UNDER	GO:1901028	regulation of mitochondrial outer membrane permeabilization involved in apoptotic signaling pathway	0.0004408	3.22371e-05	6	33
878	UNDER	GO:0052652	cyclic purine nucleotide metabolic process	0.000442929	3.24308e-05	24	66
879	UNDER	GO:0021587	cerebellum morphogenesis	0.000443409	3.2504e-05	9	39
880	UNDER	GO:1901137	carbohydrate derivative biosynthetic process	0.000446396	3.27613e-05	670	888
881	UNDER	GO:1903426	regulation of reactive oxygen species biosynthetic process	0.000447487	3.28797e-05	15	51
882	UNDER	GO:0010256	endomembrane system organization	0.000449363	3.30561e-05	217	334
883	UNDER	GO:1903524	positive regulation of blood circulation	0.000449631	3.31241e-05	7	35
884	UNDER	GO:0042149	cellular response to glucose starvation	0.000449631	3.3153e-05	8	37
885	UNDER	GO:0019216	regulation of lipid metabolic process	0.000449851	3.32079e-05	75	144
886	UNDER	GO:0006977	DNA damage response, signal transduction by p53 class mediator resulting in cell cycle arrest	0.000456654	3.37885e-05	21	61
887	UNDER	GO:0006020	inositol metabolic process	0.000456654	3.37885e-05	21	61
888	UNDER	GO:0042313	protein kinase C deactivation	0.000473753	3.50943e-05	0	16
889	UNDER	GO:1901990	regulation of mitotic cell cycle phase transition	0.000474799	3.52125e-05	138	230
890	UNDER	GO:0036499	PERK-mediated unfolded protein response	0.000479361	3.55921e-05	3	25
891	UNDER	GO:0090175	regulation of establishment of planar polarity	0.000504129	3.74743e-05	34	82
892	UNDER	GO:0010243	response to organonitrogen compound	0.000512744	3.81587e-05	178	282
893	UNDER	GO:0010038	response to metal ion	0.000512878	3.82127e-05	89	163
894	UNDER	GO:0032940	secretion by cell	0.000514791	3.83995e-05	275	406
895	UNDER	GO:0198738	cell-cell signaling by wnt	0.000518919	3.87519e-05	232	352
896	UNDER	GO:0006919	activation of cysteine-type endopeptidase activity involved in apoptotic process	0.000540124	4.04282e-05	13	46
897	UNDER	GO:0006809	nitric oxide biosynthetic process	0.000540124	4.04282e-05	13	46
898	UNDER	GO:0043547	positive regulation of GTPase activity	0.000544906	4.08329e-05	189	296
899	UNDER	GO:0002478	antigen processing and presentation of exogenous peptide antigen	0.00058006	4.3517e-05	31	77
900	UNDER	GO:0048871	multicellular organismal homeostasis	0.000580316	4.3586e-05	61	123
901	UNDER	GO:0001895	retina homeostasis	0.000581439	4.37202e-05	12	44
902	UNDER	GO:0051444	negative regulation of ubiquitin-protein transferase activity	0.000590437	4.44475e-05	19	57
903	UNDER	GO:1903897	regulation of PERK-mediated unfolded protein response	0.000591417	4.4572e-05	2	22
904	UNDER	GO:0006983	ER overload response	0.000597256	4.50633e-05	4	27
905	UNDER	GO:0016055	Wnt signaling pathway	0.000604941	4.56951e-05	232	351
906	UNDER	GO:0071214	cellular response to abiotic stimulus	0.00061797	4.67323e-05	76	144
907	UNDER	GO:0048532	anatomical structure arrangement	0.000619312	4.6887e-05	11	42
908	UNDER	GO:0042110	T cell activation	0.000626246	4.74656e-05	42	94
909	UNDER	GO:0071804	cellular potassium ion transport	0.000626875	4.76507e-05	54	112
910	UNDER	GO:0045936	negative regulation of phosphate metabolic process	0.000626875	4.77286e-05	136	226
911	UNDER	GO:0010563	negative regulation of phosphorus metabolic process	0.000626875	4.77286e-05	136	226
912	UNDER	GO:0071805	potassium ion transmembrane transport	0.000626875	4.76507e-05	54	112
913	UNDER	GO:0033160	positive regulation of protein import into nucleus, translocation	0.000627022	4.77936e-05	1	19
914	UNDER	GO:0017148	negative regulation of translation	0.000631124	4.81604e-05	62	124
915	UNDER	GO:0072395	signal transduction involved in cell cycle checkpoint	0.000640247	4.89665e-05	26	69
916	UNDER	GO:0007610	behavior	0.000640247	4.89165e-05	153	248
917	UNDER	GO:0030522	intracellular receptor signaling pathway	0.000643868	4.92988e-05	65	128
918	UNDER	GO:0046058	cAMP metabolic process	0.000647099	4.96017e-05	21	60
919	UNDER	GO:0051270	regulation of cellular component movement	0.000647613	4.96966e-05	171	272
920	UNDER	GO:0030814	regulation of cAMP metabolic process	0.000647948	4.97779e-05	10	40
921	UNDER	GO:0006687	glycosphingolipid metabolic process	0.000653253	5.02416e-05	57	116
922	UNDER	GO:0051701	interaction with host	0.000653378	5.03073e-05	28	72
923	UNDER	GO:0040017	positive regulation of locomotion	0.000665863	5.13829e-05	93	167
924	UNDER	GO:0019884	antigen processing and presentation of exogenous antigen	0.00067173	5.18933e-05	32	78
925	UNDER	GO:0009612	response to mechanical stimulus	0.000674957	5.22005e-05	34	81
926	UNDER	GO:2000021	regulation of ion homeostasis	0.0006918	5.35625e-05	50	106
927	UNDER	GO:0051146	striated muscle cell differentiation	0.000696265	5.41856e-05	84	155
928	UNDER	GO:0072431	signal transduction involved in mitotic G1 DNA damage checkpoint	0.000696265	5.42071e-05	23	63
929	UNDER	GO:1904064	positive regulation of cation transmembrane transport	0.000696265	5.42071e-05	23	63
930	UNDER	GO:1902400	intracellular signal transduction involved in G1 DNA damage checkpoint	0.000696265	5.42071e-05	23	63
931	UNDER	GO:0090279	regulation of calcium ion import	0.000696265	5.42071e-05	23	63
932	UNDER	GO:0007169	transmembrane receptor protein tyrosine kinase signaling pathway	0.000712161	5.55058e-05	183	287
933	UNDER	GO:0051279	regulation of release of sequestered calcium ion into cytosol	0.00073167	5.71519e-05	20	58
934	UNDER	GO:0048477	oogenesis	0.000744974	5.8255e-05	39	89
935	UNDER	GO:0001817	regulation of cytokine production	0.000751681	5.88441e-05	95	170
936	UNDER	GO:1901019	regulation of calcium ion transmembrane transporter activity	0.000757717	5.93816e-05	27	70
937	UNDER	GO:0060314	regulation of ryanodine-sensitive calcium-release channel activity	0.00079013	6.2187e-05	13	45
938	UNDER	GO:0010591	regulation of lamellipodium assembly	0.00079013	6.2187e-05	13	45
939	UNDER	GO:0040014	regulation of multicellular organism growth	0.00079013	6.2187e-05	13	45
940	UNDER	GO:0019362	pyridine nucleotide metabolic process	0.00079013	6.22609e-05	276	404
941	UNDER	GO:0001894	tissue homeostasis	0.00079013	6.22502e-05	44	96
942	UNDER	GO:0010042	response to manganese ion	0.000790481	6.24921e-05	3	24
943	UNDER	GO:0007635	chemosensory behavior	0.000790481	6.24921e-05	3	24
944	UNDER	GO:0043496	regulation of protein homodimerization activity	0.000790481	6.24921e-05	3	24
945	UNDER	GO:1903311	regulation of mRNA metabolic process	0.000824523	6.52541e-05	77	144
946	UNDER	GO:0065004	protein-DNA complex assembly	0.000828869	6.56692e-05	111	191
947	UNDER	GO:0070301	cellular response to hydrogen peroxide	0.000830188	6.58449e-05	19	56
948	UNDER	GO:0050803	regulation of synapse structure or activity	0.000854123	6.78167e-05	12	43
949	UNDER	GO:0042908	xenobiotic transport	0.000868386	6.90237e-05	0	15
950	UNDER	GO:0072422	signal transduction involved in DNA damage checkpoint	0.00088121	7.01942e-05	26	68
951	UNDER	GO:0072401	signal transduction involved in DNA integrity checkpoint	0.00088121	7.01942e-05	26	68
952	UNDER	GO:0060401	cytosolic calcium ion transport	0.00089637	7.14788e-05	28	71
953	UNDER	GO:0030239	myofibril assembly	0.000905095	7.22522e-05	30	74
954	UNDER	GO:0060071	Wnt signaling pathway, planar cell polarity pathway	0.000906939	7.24772e-05	34	80
955	UNDER	GO:0006182	cGMP biosynthetic process	0.000917486	7.33989e-05	11	41
956	UNDER	GO:1904667	negative regulation of ubiquitin protein ligase activity	0.000947042	7.58447e-05	18	54
957	UNDER	GO:0009206	purine ribonucleoside triphosphate biosynthetic process	0.000947777	7.59849e-05	106	184
958	UNDER	GO:0030335	positive regulation of cell migration	0.00095436	7.65946e-05	79	146
959	UNDER	GO:0006987	activation of signaling protein activity involved in unfolded protein response	0.000959789	7.7195e-05	4	26
960	UNDER	GO:0043457	regulation of cellular respiration	0.000959789	7.7195e-05	4	26
961	UNDER	GO:0098754	detoxification	0.000960788	7.73578e-05	67	129
962	UNDER	GO:0032091	negative regulation of protein binding	0.000976596	7.87145e-05	10	39
963	UNDER	GO:0009145	purine nucleoside triphosphate biosynthetic process	0.000996811	8.05148e-05	107	185
964	UNDER	GO:0032409	regulation of transporter activity	0.000996811	8.05149e-05	46	98
965	UNDER	GO:0040007	growth	0.000999278	8.08e-05	330	469
966	UNDER	GO:0048646	anatomical structure formation involved in morphogenesis	0.00102068	8.26181e-05	331	471
967	UNDER	GO:0042059	negative regulation of epidermal growth factor receptor signaling pathway	0.00107203	8.73334e-05	17	52
968	UNDER	GO:1901185	negative regulation of ERBB signaling pathway	0.00107203	8.73334e-05	17	52
969	UNDER	GO:0090083	regulation of inclusion body assembly	0.00107203	8.72769e-05	8	35
970	UNDER	GO:0043009	chordate embryonic development	0.00107203	8.72793e-05	260	382
971	UNDER	GO:1902531	regulation of intracellular signal transduction	0.00107203	8.7419e-05	602	798
972	UNDER	GO:0005513	detection of calcium ion	0.00107203	8.72769e-05	8	35
973	UNDER	GO:0009142	nucleoside triphosphate biosynthetic process	0.00107841	8.8032e-05	124	207
974	UNDER	GO:0061635	regulation of protein complex stability	0.00109361	8.93661e-05	1	18
975	UNDER	GO:0032878	regulation of establishment or maintenance of cell polarity	0.00110059	9.00307e-05	6	31
976	UNDER	GO:0023014	signal transduction by protein phosphorylation	0.00110657	9.06511e-05	250	369
977	UNDER	GO:0000226	microtubule cytoskeleton organization	0.00110657	9.07104e-05	329	467
978	UNDER	GO:0009755	hormone-mediated signaling pathway	0.00111043	9.11222e-05	47	99
979	UNDER	GO:0010466	negative regulation of peptidase activity	0.00111364	9.14811e-05	40	89
980	UNDER	GO:0000070	mitotic sister chromatid segregation	0.00111593	9.17651e-05	88	158
981	UNDER	GO:0006081	cellular aldehyde metabolic process	0.00114154	9.39685e-05	178	277
982	UNDER	GO:0090101	negative regulation of transmembrane receptor protein serine/threonine kinase signaling pathway	0.0011548	9.52476e-05	38	86
983	UNDER	GO:0000715	nucleotide-excision repair, DNA damage recognition	0.0011548	9.52589e-05	13	44
984	UNDER	GO:0043491	protein kinase B signaling	0.00117526	9.71482e-05	19	55
985	UNDER	GO:0061077	chaperone-mediated protein folding	0.00122607	0.000101453	30	73
986	UNDER	GO:0043623	cellular protein complex assembly	0.00125972	0.000104346	398	551
987	UNDER	GO:0061418	regulation of transcription from RNA polymerase II promoter in response to hypoxia	0.00126325	0.000104747	12	42
988	UNDER	GO:0009152	purine ribonucleotide biosynthetic process	0.0012683	0.000105274	196	300
989	UNDER	GO:0072321	chaperone-mediated protein transport	0.00131615	0.000109359	3	23
990	UNDER	GO:0048699	generation of neurons	0.00131667	0.000109515	461	627
991	UNDER	GO:0051436	negative regulation of ubiquitin-protein ligase activity involved in mitotic cell cycle	0.00135045	0.000112441	18	53
992	UNDER	GO:0010522	regulation of calcium ion transport into cytosol	0.00135371	0.000112829	23	61
993	UNDER	GO:0002831	regulation of response to biotic stimulus	0.00135762	0.000113271	44	94
994	UNDER	GO:0002221	pattern recognition receptor signaling pathway	0.00136259	0.000113803	37	84
995	UNDER	GO:0018126	protein hydroxylation	0.00136277	0.000114403	11	40
996	UNDER	GO:1903514	calcium ion transport from endoplasmic reticulum to cytosol	0.00136277	0.000114403	11	40
997	UNDER	GO:0070296	sarcoplasmic reticulum calcium ion transport	0.00136277	0.000114403	11	40
998	UNDER	GO:0014808	release of sequestered calcium ion into cytosol by sarcoplasmic reticulum	0.00136277	0.000114403	11	40
999	UNDER	GO:0010880	regulation of release of sequestered calcium ion into cytosol by sarcoplasmic reticulum	0.00136277	0.000114403	11	40
1000	UNDER	GO:0001933	negative regulation of protein phosphorylation	0.00140738	0.000118268	110	187
1001	UNDER	GO:0050878	regulation of body fluid levels	0.00145883	0.000122717	55	110
1002	UNDER	GO:0045995	regulation of embryonic development	0.00147777	0.000124437	40	88
1003	UNDER	GO:0007292	female gamete generation	0.00150875	0.000127175	50	103
1004	UNDER	GO:0048545	response to steroid hormone	0.0015602	0.000131646	53	107
1005	UNDER	GO:0019511	peptidyl-proline hydroxylation	0.00157306	0.000132866	9	36
1006	UNDER	GO:0090557	establishment of endothelial intestinal barrier	0.00160228	0.000135884	0	14
1007	UNDER	GO:0007349	cellularization	0.00160228	0.000135884	0	14
1008	UNDER	GO:0007519	skeletal muscle tissue development	0.00160228	0.000135683	36	81
1009	UNDER	GO:0032757	positive regulation of interleukin-8 production	0.00160228	0.000135884	0	14
1010	UNDER	GO:0051272	positive regulation of cellular component movement	0.00160628	0.000136499	87	155
1011	UNDER	GO:1900180	regulation of protein localization to nucleus	0.00160628	0.000136481	48	100
1012	UNDER	GO:0045926	negative regulation of growth	0.0016435	0.000140438	32	75
1013	UNDER	GO:0030816	positive regulation of cAMP metabolic process	0.0016435	0.00014065	8	34
1014	UNDER	GO:0002697	regulation of immune effector process	0.0016435	0.000140635	65	124
1015	UNDER	GO:0060316	positive regulation of ryanodine-sensitive calcium-release channel activity	0.0016435	0.00014065	8	34
1016	UNDER	GO:0010823	negative regulation of mitochondrion organization	0.0016435	0.00014065	8	34
1017	UNDER	GO:0034249	negative regulation of cellular amide metabolic process	0.0016435	0.000140635	65	124
1018	UNDER	GO:0018108	peptidyl-tyrosine phosphorylation	0.0016435	0.000140127	98	170
1019	UNDER	GO:0022008	neurogenesis	0.0016645	0.000142733	529	706
1020	UNDER	GO:0018212	peptidyl-tyrosine modification	0.0016645	0.000142595	102	175
1021	UNDER	GO:0032459	regulation of protein oligomerization	0.00167985	0.000144626	2	20
1022	UNDER	GO:0036092	phosphatidylinositol-3-phosphate biosynthetic process	0.00167985	0.000144626	2	20
1023	UNDER	GO:0032462	regulation of protein homooligomerization	0.00167985	0.000144626	2	20
1024	UNDER	GO:0032077	positive regulation of deoxyribonuclease activity	0.00167985	0.000144626	2	20
1025	UNDER	GO:0051348	negative regulation of transferase activity	0.00169784	0.00014632	95	166
1026	UNDER	GO:2000765	regulation of cytoplasmic translation	0.00170236	0.000146856	5	27
1027	UNDER	GO:0090084	negative regulation of inclusion body assembly	0.00171676	0.000148245	5	28
1028	UNDER	GO:0010821	regulation of mitochondrion organization	0.00174145	0.000150676	85	152
1029	UNDER	GO:0009583	detection of light stimulus	0.00174145	0.000150582	16	49
1030	UNDER	GO:0006643	membrane lipid metabolic process	0.00175746	0.000152213	131	213
1031	UNDER	GO:0051091	positive regulation of sequence-specific DNA binding transcription factor activity	0.00176357	0.000152893	60	117
1032	UNDER	GO:0009201	ribonucleoside triphosphate biosynthetic process	0.00178955	0.0001553	119	197
1033	UNDER	GO:0090288	negative regulation of cellular response to growth factor stimulus	0.00179161	0.000155785	37	83
1034	UNDER	GO:0009636	response to toxic substance	0.00179161	0.000155722	89	157
1035	UNDER	GO:0090002	establishment of protein localization to plasma membrane	0.00184384	0.000160485	35	79
1036	UNDER	GO:2000147	positive regulation of cell motility	0.00184756	0.000160967	86	153
1037	UNDER	GO:0009895	negative regulation of catabolic process	0.00185565	0.000161832	23	60
1038	UNDER	GO:0007179	transforming growth factor beta receptor signaling pathway	0.00185699	0.000162108	47	97
1039	UNDER	GO:1902373	negative regulation of mRNA catabolic process	0.00189614	0.000166828	1	17
1040	UNDER	GO:2000622	regulation of nuclear-transcribed mRNA catabolic process, nonsense-mediated decay	0.00189614	0.000166828	1	17
1041	UNDER	GO:0043335	protein unfolding	0.00189614	0.000166828	1	17
1042	UNDER	GO:0061741	chaperone-mediated protein transport involved in chaperone-mediated autophagy	0.00189614	0.000166828	1	17
1043	UNDER	GO:2000623	negative regulation of nuclear-transcribed mRNA catabolic process, nonsense-mediated decay	0.00189614	0.000166828	1	17
1044	UNDER	GO:1904764	chaperone-mediated autophagy translocation complex disassembly	0.00189614	0.000166828	1	17
1045	UNDER	GO:0002698	negative regulation of immune effector process	0.00189614	0.000166828	1	17
1046	UNDER	GO:1902369	negative regulation of RNA catabolic process	0.00189614	0.000166828	1	17
1047	UNDER	GO:0019985	translesion synthesis	0.00191247	0.000168429	25	63
1048	UNDER	GO:0060402	calcium ion transport into cytosol	0.00192052	0.000169633	27	67
1049	UNDER	GO:0034764	positive regulation of transmembrane transport	0.00192052	0.000169633	27	67
1050	UNDER	GO:0043410	positive regulation of MAPK cascade	0.00192052	0.000169575	105	178
1051	UNDER	GO:0050877	neurological system process	0.00192768	0.00017043	180	276
1052	UNDER	GO:1905330	regulation of morphogenesis of an epithelium	0.00193379	0.000171273	45	94
1053	UNDER	GO:0042326	negative regulation of phosphorylation	0.00193379	0.000171302	121	200
1054	UNDER	GO:0051186	cofactor metabolic process	0.00194225	0.000172218	683	886
1055	UNDER	GO:0050764	regulation of phagocytosis	0.00196242	0.000174176	15	47
1056	UNDER	GO:0046649	lymphocyte activation	0.00200315	0.000177962	84	150
1057	UNDER	GO:0051301	cell division	0.00201828	0.00017948	247	361
1058	UNDER	GO:0055001	muscle cell development	0.00203622	0.0001816	65	123
1059	UNDER	GO:0031047	gene silencing by RNA	0.00203622	0.00018159	48	98
1060	UNDER	GO:0001738	morphogenesis of a polarized epithelium	0.00203622	0.00018159	48	98
1061	UNDER	GO:0009306	protein secretion	0.00205104	0.000183274	88	155
1062	UNDER	GO:0030811	regulation of nucleotide catabolic process	0.00212179	0.000190688	3	22
1063	UNDER	GO:0030820	regulation of cAMP catabolic process	0.00212179	0.000190688	3	22
1064	UNDER	GO:0018209	peptidyl-serine modification	0.00212179	0.000189792	107	180
1065	UNDER	GO:0030805	regulation of cyclic nucleotide catabolic process	0.00212179	0.000190688	3	22
1066	UNDER	GO:0033121	regulation of purine nucleotide catabolic process	0.00212179	0.000190688	3	22
1067	UNDER	GO:0051963	regulation of synapse assembly	0.00212179	0.000190688	3	22
1068	UNDER	GO:0070527	platelet aggregation	0.00215398	0.000194178	10	37
1069	UNDER	GO:0006082	organic acid metabolic process	0.00215398	0.000194149	1933	2323
1070	UNDER	GO:0007204	positive regulation of cytosolic calcium ion concentration	0.00215398	0.00019432	32	74
1071	UNDER	GO:0036003	positive regulation of transcription from RNA polymerase II promoter in response to stress	0.00215398	0.000194178	10	37
1072	UNDER	GO:0000060	protein import into nucleus, translocation	0.00216832	0.000196545	14	44
1073	UNDER	GO:1902883	negative regulation of response to oxidative stress	0.00216832	0.000196545	14	44
1074	UNDER	GO:1900408	negative regulation of cellular response to oxidative stress	0.00216832	0.000196545	14	44
1075	UNDER	GO:0002027	regulation of heart rate	0.00216832	0.000196545	14	44
1076	UNDER	GO:1903202	negative regulation of oxidative stress-induced cell death	0.00216832	0.000196545	14	44
1077	UNDER	GO:0042391	regulation of membrane potential	0.00220269	0.000199849	120	198
1078	UNDER	GO:0051341	regulation of oxidoreductase activity	0.00222413	0.000201986	26	65
1079	UNDER	GO:0043408	regulation of MAPK cascade	0.00227474	0.000206777	161	251
1080	UNDER	GO:0050850	positive regulation of calcium-mediated signaling	0.0023134	0.000210489	9	35
1081	UNDER	GO:0030837	negative regulation of actin filament polymerization	0.0023333	0.000212501	37	82
1082	UNDER	GO:0098869	cellular oxidant detoxification	0.0023469	0.000214142	67	125
1083	UNDER	GO:1990748	cellular detoxification	0.0023469	0.000214142	67	125
1084	UNDER	GO:0009914	hormone transport	0.00235899	0.000215448	42	89
1085	UNDER	GO:0043436	oxoacid metabolic process	0.0023849	0.000218019	1932	2320
1086	UNDER	GO:0019751	polyol metabolic process	0.00240261	0.000219844	77	139
1087	UNDER	GO:0010469	regulation of receptor activity	0.00241804	0.000221464	21	56
1088	UNDER	GO:2001244	positive regulation of intrinsic apoptotic signaling pathway	0.0024471	0.000224545	16	48
1089	UNDER	GO:0051220	cytoplasmic sequestering of protein	0.0024471	0.000224545	16	48
1090	UNDER	GO:0051238	sequestering of metal ion	0.00245508	0.000225488	33	75
1091	UNDER	GO:0007219	Notch signaling pathway	0.00252331	0.000231971	56	109
1092	UNDER	GO:0046390	ribose phosphate biosynthetic process	0.00258463	0.00023783	223	329
1093	UNDER	GO:0006415	translational termination	0.00259269	0.000238794	27	66
1094	UNDER	GO:0080171	lytic vacuole organization	0.00262106	0.000242273	43	90
1095	UNDER	GO:0007346	regulation of mitotic cell cycle	0.00262106	0.000241918	247	359
1096	UNDER	GO:0009260	ribonucleotide biosynthetic process	0.00262106	0.000242308	218	322
1097	UNDER	GO:0007040	lysosome organization	0.00262106	0.000242273	43	90
1098	UNDER	GO:0046513	ceramide biosynthetic process	0.00263994	0.00024428	5	26
1099	UNDER	GO:0071407	cellular response to organic cyclic compound	0.00264183	0.000244681	104	175
1100	UNDER	GO:0060284	regulation of cell development	0.00265432	0.000246087	213	316
1101	UNDER	GO:0006878	cellular copper ion homeostasis	0.00265432	0.00024675	6	29
1102	UNDER	GO:0050663	cytokine secretion	0.00265432	0.000246526	12	40
1103	UNDER	GO:0009584	detection of visible light	0.00265432	0.000246526	12	40
1104	UNDER	GO:0061061	muscle structure development	0.00266415	0.000247892	176	269
1105	UNDER	GO:0031145	anaphase-promoting complex-dependent catabolic process	0.00270752	0.00025216	36	79
1106	UNDER	GO:0046916	cellular transition metal ion homeostasis	0.00273775	0.000255445	46	94
1107	UNDER	GO:0042998	positive regulation of Golgi to plasma membrane protein transport	0.00274184	0.000259356	2	19
1108	UNDER	GO:0098609	cell-cell adhesion	0.00274184	0.000257688	209	311
1109	UNDER	GO:0032464	positive regulation of protein homooligomerization	0.00274184	0.000259356	2	19
1110	UNDER	GO:0036476	neuron death in response to hydrogen peroxide	0.00274184	0.000259356	2	19
1111	UNDER	GO:0032461	positive regulation of protein oligomerization	0.00274184	0.000259356	2	19
1112	UNDER	GO:1903208	negative regulation of hydrogen peroxide-induced neuron death	0.00274184	0.000259356	2	19
1113	UNDER	GO:1903207	regulation of hydrogen peroxide-induced neuron death	0.00274184	0.000259356	2	19
1114	UNDER	GO:0042996	regulation of Golgi to plasma membrane protein transport	0.00274184	0.000259356	2	19
1115	UNDER	GO:0030807	positive regulation of cyclic nucleotide catabolic process	0.00274184	0.000259356	2	19
1116	UNDER	GO:0033123	positive regulation of purine nucleotide catabolic process	0.00274184	0.000259356	2	19
1117	UNDER	GO:0030813	positive regulation of nucleotide catabolic process	0.00274184	0.000259356	2	19
1118	UNDER	GO:0030822	positive regulation of cAMP catabolic process	0.00274184	0.000259356	2	19
1119	UNDER	GO:0055002	striated muscle cell development	0.00274184	0.000257796	60	114
1120	UNDER	GO:0070423	nucleotide-binding oligomerization domain containing signaling pathway	0.00274705	0.000260085	15	45
1121	UNDER	GO:1903265	positive regulation of tumor necrosis factor-mediated signaling pathway	0.00282053	0.000267769	0	13
1122	UNDER	GO:0000236	mitotic prometaphase	0.00282053	0.000267769	0	13
1123	UNDER	GO:0006733	oxidoreduction coenzyme metabolic process	0.00284043	0.000269902	366	504
1124	UNDER	GO:0032844	regulation of homeostatic process	0.00293853	0.000279728	123	200
1125	UNDER	GO:2001243	negative regulation of intrinsic apoptotic signaling pathway	0.00294354	0.000280458	28	67
1126	UNDER	GO:0051928	positive regulation of calcium ion transport	0.00298605	0.000284952	26	64
1127	UNDER	GO:0038128	ERBB2 signaling pathway	0.00298605	0.000285021	17	49
1128	UNDER	GO:0060627	regulation of vesicle-mediated transport	0.00299094	0.000285744	170	260
1129	UNDER	GO:0044262	cellular carbohydrate metabolic process	0.0030788	0.000294402	243	352
1130	UNDER	GO:0031344	regulation of cell projection organization	0.00308075	0.000294853	166	255
1131	UNDER	GO:0030099	myeloid cell differentiation	0.00311881	0.000298764	116	190
1132	UNDER	GO:0070997	neuron death	0.00313307	0.000300398	65	121
1133	UNDER	GO:0051099	positive regulation of binding	0.00322223	0.000309223	33	74
1134	UNDER	GO:0010629	negative regulation of gene expression	0.00325783	0.000312919	541	712
1135	UNDER	GO:0014902	myotube differentiation	0.00331363	0.000318563	21	55
1136	UNDER	GO:0072522	purine-containing compound biosynthetic process	0.00333719	0.000321115	217	319
1137	UNDER	GO:0048013	ephrin receptor signaling pathway	0.00341154	0.000328866	23	58
1138	UNDER	GO:1901184	regulation of ERBB signaling pathway	0.00341154	0.000328866	23	58
1139	UNDER	GO:1903203	regulation of oxidative stress-induced neuron death	0.00342064	0.0003312	3	21
1140	UNDER	GO:0061099	negative regulation of protein tyrosine kinase activity	0.00342064	0.0003312	3	21
1141	UNDER	GO:0036475	neuron death in response to oxidative stress	0.00342064	0.0003312	3	21
1142	UNDER	GO:0010658	striated muscle cell apoptotic process	0.00342364	0.000331784	9	34
1143	UNDER	GO:0006294	nucleotide-excision repair, preincision complex assembly	0.00343464	0.000333334	13	41
1144	UNDER	GO:1901071	glucosamine-containing compound metabolic process	0.00343464	0.00033344	98	166
1145	UNDER	GO:0071383	cellular response to steroid hormone stimulus	0.00354625	0.00034458	41	86
1146	UNDER	GO:0045321	leukocyte activation	0.00359214	0.000349347	95	161
1147	UNDER	GO:0033157	regulation of intracellular protein transport	0.00361678	0.000352053	103	172
1148	UNDER	GO:0055076	transition metal ion homeostasis	0.00364663	0.000355273	52	102
1149	UNDER	GO:0019915	lipid storage	0.00365504	0.000356719	18	50
1150	UNDER	GO:0050848	regulation of calcium-mediated signaling	0.00365504	0.000356719	18	50
1151	UNDER	GO:0030182	neuron differentiation	0.00367151	0.000358642	407	551
1152	UNDER	GO:0035437	maintenance of protein localization in endoplasmic reticulum	0.00367758	0.000359867	8	32
1153	UNDER	GO:0045806	negative regulation of endocytosis	0.00367758	0.000359867	8	32
1154	UNDER	GO:1902532	negative regulation of intracellular signal transduction	0.00367909	0.000360329	152	236
1155	UNDER	GO:0050808	synapse organization	0.00368426	0.000361152	44	90
1156	UNDER	GO:0007178	transmembrane receptor protein serine/threonine kinase signaling pathway	0.00369276	0.000362303	167	255
1157	UNDER	GO:0007599	hemostasis	0.0037386	0.000367121	39	83
1158	UNDER	GO:0051439	regulation of ubiquitin-protein ligase activity involved in mitotic cell cycle	0.00380732	0.000374522	20	53
1159	UNDER	GO:0000902	cell morphogenesis	0.00381051	0.000375163	299	420
1160	UNDER	GO:0033158	regulation of protein import into nucleus, translocation	0.00384456	0.000378846	4	23
1161	UNDER	GO:0008356	asymmetric cell division	0.00389565	0.000385218	7	30
1162	UNDER	GO:0006790	sulfur compound metabolic process	0.00389565	0.000385165	396	537
1163	UNDER	GO:0051131	chaperone-mediated protein complex assembly	0.00389565	0.000385218	7	30
1164	UNDER	GO:0055070	copper ion homeostasis	0.00389565	0.000385218	7	30
1165	UNDER	GO:0007423	sensory organ development	0.00389843	0.000385827	224	327
1166	UNDER	GO:0018105	peptidyl-serine phosphorylation	0.0039413	0.000390408	105	174
1167	UNDER	GO:1904668	positive regulation of ubiquitin protein ligase activity	0.00394173	0.000390789	28	66
1168	UNDER	GO:0090130	tissue migration	0.00394919	0.000391868	56	107
1169	UNDER	GO:0051437	positive regulation of ubiquitin-protein ligase activity involved in regulation of mitotic cell cycle transition	0.00397757	0.000395026	24	59
1170	UNDER	GO:0002224	toll-like receptor signaling pathway	0.00402351	0.000400279	26	63
1171	UNDER	GO:0071158	positive regulation of cell cycle arrest	0.00402351	0.000400279	26	63
1172	UNDER	GO:0061028	establishment of endothelial barrier	0.00407043	0.000405296	6	28
1173	UNDER	GO:0044708	single-organism behavior	0.00409803	0.000408395	94	159
1174	UNDER	GO:0032388	positive regulation of intracellular transport	0.00415759	0.000414689	76	135
1175	UNDER	GO:0051960	regulation of nervous system development	0.00440443	0.000439687	189	282
1176	UNDER	GO:0031175	neuron projection development	0.00449743	0.000449357	255	364
1177	UNDER	GO:0046500	S-adenosylmethionine metabolic process	0.00453462	0.000453462	29	67
1178	UNDER	GO:0042058	regulation of epidermal growth factor receptor signaling pathway	0.00455798	0.000456189	21	54
1179	UNDER	GO:0005976	polysaccharide metabolic process	0.00457614	0.0004584	121	194
1180	UNDER	GO:0071900	regulation of protein serine/threonine kinase activity	0.00459172	0.000460354	164	250
1181	UNDER	GO:1900740	positive regulation of protein insertion into mitochondrial membrane involved in apoptotic signaling pathway	0.00459965	0.000463519	2	18
1182	UNDER	GO:1900739	regulation of protein insertion into mitochondrial membrane involved in apoptotic signaling pathway	0.00459965	0.000463519	2	18
1183	UNDER	GO:0001844	protein insertion into mitochondrial membrane involved in apoptotic signaling pathway	0.00459965	0.000463519	2	18
1184	UNDER	GO:0050832	defense response to fungus	0.00459965	0.000463519	2	18
1185	UNDER	GO:0009190	cyclic nucleotide biosynthetic process	0.00459965	0.00046206	36	77
1186	UNDER	GO:0050830	defense response to Gram-positive bacterium	0.00459965	0.000463519	2	18
1187	UNDER	GO:1902582	single-organism intracellular transport	0.00461376	0.000465337	409	551
1188	UNDER	GO:1904375	regulation of protein localization to cell periphery	0.00461462	0.00046582	23	57
1189	UNDER	GO:0034767	positive regulation of ion transmembrane transport	0.00462551	0.000467316	27	64
1190	UNDER	GO:0001503	ossification	0.00476935	0.000482666	97	163
1191	UNDER	GO:1901615	organic hydroxy compound metabolic process	0.00482882	0.000489099	204	300
1192	UNDER	GO:0050817	coagulation	0.00485645	0.000492845	39	82
1193	UNDER	GO:0006164	purine nucleotide biosynthetic process	0.00485645	0.000493149	210	308
1194	UNDER	GO:0007596	blood coagulation	0.00485645	0.000492845	39	82
1195	UNDER	GO:0000904	cell morphogenesis involved in differentiation	0.00485653	0.000493574	193	286
1196	UNDER	GO:0001736	establishment of planar polarity	0.00485696	0.000494451	47	93
1197	UNDER	GO:0007164	establishment of tissue polarity	0.00485696	0.000494451	47	93
1198	UNDER	GO:0045165	cell fate commitment	0.00496228	0.000505599	50	98
1199	UNDER	GO:0051896	regulation of protein kinase B signaling	0.00509175	0.000519227	18	49
1200	UNDER	GO:0030810	positive regulation of nucleotide biosynthetic process	0.00509268	0.000520196	9	33
1201	UNDER	GO:1900373	positive regulation of purine nucleotide biosynthetic process	0.00509268	0.000520196	9	33
1202	UNDER	GO:0031437	regulation of mRNA cleavage	0.00511504	0.000528188	0	12
1203	UNDER	GO:0070370	cellular heat acclimation	0.00511504	0.000528188	0	12
1204	UNDER	GO:0070434	positive regulation of nucleotide-binding oligomerization domain containing 2 signaling pathway	0.00511504	0.000528188	0	12
1205	UNDER	GO:1902380	positive regulation of endoribonuclease activity	0.00511504	0.000528188	0	12
1206	UNDER	GO:0070426	positive regulation of nucleotide-binding oligomerization domain containing signaling pathway	0.00511504	0.000528188	0	12
1207	UNDER	GO:0060700	regulation of ribonuclease activity	0.00511504	0.000528188	0	12
1208	UNDER	GO:0060699	regulation of endoribonuclease activity	0.00511504	0.000528188	0	12
1209	UNDER	GO:1903896	positive regulation of IRE1-mediated unfolded protein response	0.00511504	0.000528188	0	12
1210	UNDER	GO:0031439	positive regulation of mRNA cleavage	0.00511504	0.000528188	0	12
1211	UNDER	GO:1904720	regulation of mRNA endonucleolytic cleavage involved in unfolded protein response	0.00511504	0.000528188	0	12
1212	UNDER	GO:0010286	heat acclimation	0.00511504	0.000528188	0	12
1213	UNDER	GO:0035046	pronuclear migration	0.00511504	0.000528188	0	12
1214	UNDER	GO:1904722	positive regulation of mRNA endonucleolytic cleavage involved in unfolded protein response	0.00511504	0.000528188	0	12
1215	UNDER	GO:0019752	carboxylic acid metabolic process	0.00526344	0.000543964	1910	2278
1216	UNDER	GO:0008361	regulation of cell size	0.00527558	0.000546124	48	94
1217	UNDER	GO:0038095	Fc-epsilon receptor signaling pathway	0.00527558	0.000546124	48	94
1218	UNDER	GO:0051241	negative regulation of multicellular organismal process	0.00533845	0.000553091	197	290
1219	UNDER	GO:0006970	response to osmotic stress	0.00535015	0.0005555	24	58
1220	UNDER	GO:0072523	purine-containing compound catabolic process	0.00535015	0.00055568	26	61
1221	UNDER	GO:1903037	regulation of leukocyte cell-cell adhesion	0.00535015	0.0005555	24	58
1222	UNDER	GO:0090382	phagosome maturation	0.00547393	0.000569007	12	38
1223	UNDER	GO:0033962	cytoplasmic mRNA processing body assembly	0.00548863	0.000571006	8	31
1224	UNDER	GO:0006007	glucose catabolic process	0.00549675	0.000572794	3	20
1225	UNDER	GO:0071236	cellular response to antibiotic	0.00549675	0.000572794	3	20
1226	UNDER	GO:0071156	regulation of cell cycle arrest	0.00551273	0.000574933	33	72
1227	UNDER	GO:0072606	interleukin-8 secretion	0.00553724	0.000577964	1	15
1228	UNDER	GO:0006040	amino sugar metabolic process	0.00571641	0.000597156	132	207
1229	UNDER	GO:1904666	regulation of ubiquitin protein ligase activity	0.00574372	0.000600503	31	69
1230	UNDER	GO:1903573	negative regulation of response to endoplasmic reticulum stress	0.00584186	0.000612267	17	47
1231	UNDER	GO:1901021	positive regulation of calcium ion transmembrane transporter activity	0.00584186	0.000612267	17	47
1232	UNDER	GO:0046879	hormone secretion	0.00584489	0.000613086	41	84
1233	UNDER	GO:0034975	protein folding in endoplasmic reticulum	0.00589663	0.000619526	7	29
1234	UNDER	GO:0060078	regulation of postsynaptic membrane potential	0.00589663	0.000619526	7	29
1235	UNDER	GO:0044255	cellular lipid metabolic process	0.00599553	0.000630432	715	909
1236	UNDER	GO:0045786	negative regulation of cell cycle	0.00602055	0.000633579	208	303
1237	UNDER	GO:0003158	endothelium development	0.00603688	0.000635815	19	50
1238	UNDER	GO:0032070	regulation of deoxyribonuclease activity	0.00605265	0.000637996	4	22
1239	UNDER	GO:0045116	protein neddylation	0.00608603	0.000643605	11	36
1240	UNDER	GO:0051281	positive regulation of release of sequestered calcium ion into cytosol	0.00608603	0.000643605	11	36
1241	UNDER	GO:0030808	regulation of nucleotide biosynthetic process	0.00608603	0.000643605	11	36
1242	UNDER	GO:1900371	regulation of purine nucleotide biosynthetic process	0.00608603	0.000643605	11	36
1243	UNDER	GO:0038127	ERBB signaling pathway	0.00612458	0.000648207	47	92
1244	UNDER	GO:0007444	imaginal disc development	0.00616493	0.000654065	14	41
1245	UNDER	GO:0043001	Golgi to plasma membrane protein transport	0.00616493	0.000654065	14	41
1246	UNDER	GO:0034109	homotypic cell-cell adhesion	0.00616493	0.000654065	14	41
1247	UNDER	GO:1903729	regulation of plasma membrane organization	0.00618148	0.000656881	23	56
1248	UNDER	GO:1903076	regulation of protein localization to plasma membrane	0.00618148	0.000656881	23	56
1249	UNDER	GO:0016572	histone phosphorylation	0.00619873	0.000661908	6	27
1250	UNDER	GO:0006452	translational frameshifting	0.00619873	0.000661908	6	27
1251	UNDER	GO:0045905	positive regulation of translational termination	0.00619873	0.000661908	6	27
1252	UNDER	GO:0050886	endocrine process	0.00619873	0.000661908	6	27
1253	UNDER	GO:0045901	positive regulation of translational elongation	0.00619873	0.000661908	6	27
1254	UNDER	GO:0050708	regulation of protein secretion	0.00619873	0.000659933	50	97
1255	UNDER	GO:0022610	biological adhesion	0.00620311	0.000662908	444	590
1256	UNDER	GO:0050732	negative regulation of peptidyl-tyrosine phosphorylation	0.00622435	0.000666246	5	24
1257	UNDER	GO:0045793	positive regulation of cell size	0.00622435	0.000666246	5	24
1258	UNDER	GO:0006555	methionine metabolic process	0.00642179	0.000687931	88	149
1259	UNDER	GO:0030010	establishment of cell polarity	0.00648104	0.000698728	45	89
1260	UNDER	GO:0042692	muscle cell differentiation	0.00648104	0.000698613	122	193
1261	UNDER	GO:0051254	positive regulation of RNA metabolic process	0.00664912	0.000717991	543	706
1262	UNDER	GO:0042493	response to drug	0.00665781	0.0007195	51	98
1263	UNDER	GO:0030203	glycosaminoglycan metabolic process	0.00666508	0.000720858	67	120
1264	UNDER	GO:0006066	alcohol metabolic process	0.00666858	0.000721963	137	213
1265	UNDER	GO:0035872	nucleotide-binding domain, leucine rich repeat containing receptor signaling pathway	0.00666858	0.000722659	16	45
1266	UNDER	GO:0006754	ATP biosynthetic process	0.00666858	0.000722954	85	144
1267	UNDER	GO:0051806	entry into cell of other organism involved in symbiotic interaction	0.00667342	0.000724624	10	34
1268	UNDER	GO:0030260	entry into host cell	0.00667342	0.000724624	10	34
1269	UNDER	GO:0006301	postreplication repair	0.00674273	0.000733308	40	82
1270	UNDER	GO:0030004	cellular monovalent inorganic cation homeostasis	0.00674273	0.000733308	40	82
1271	UNDER	GO:1990542	mitochondrial transmembrane transport	0.00679948	0.000740063	35	74
1272	UNDER	GO:0007159	leukocyte cell-cell adhesion	0.00687275	0.000749108	28	64
1273	UNDER	GO:0090280	positive regulation of calcium ion import	0.00687275	0.000749808	13	39
1274	UNDER	GO:0021575	hindbrain morphogenesis	0.00687275	0.000749808	13	39
1275	UNDER	GO:0007517	muscle organ development	0.006897	0.000753382	82	140
1276	UNDER	GO:0060538	skeletal muscle organ development	0.006897	0.000753638	43	86
1277	UNDER	GO:0090596	sensory organ morphogenesis	0.00698683	0.000765253	90	151
1278	UNDER	GO:0006030	chitin metabolic process	0.00698683	0.000765253	90	151
1279	UNDER	GO:0006470	protein dephosphorylation	0.00698683	0.000764361	274	383
1280	UNDER	GO:1904427	positive regulation of calcium ion transmembrane transport	0.00702303	0.000769821	20	51
1281	UNDER	GO:0030855	epithelial cell differentiation	0.00704303	0.000773222	134	208
1282	UNDER	GO:1903533	regulation of protein targeting	0.00704303	0.000773099	75	131
1283	UNDER	GO:0050863	regulation of T cell activation	0.00707843	0.000777716	24	57
1284	UNDER	GO:0040023	establishment of nucleus localization	0.00737578	0.00081102	9	32
1285	UNDER	GO:0090316	positive regulation of intracellular protein transport	0.00744758	0.000819554	62	113
1286	UNDER	GO:0045989	positive regulation of striated muscle contraction	0.00747603	0.000825251	2	17
1287	UNDER	GO:0006814	sodium ion transport	0.00747603	0.000824173	156	236
1288	UNDER	GO:0034486	vacuolar transmembrane transport	0.00747603	0.000825251	2	17
1289	UNDER	GO:1903020	positive regulation of glycoprotein metabolic process	0.00747603	0.000825251	2	17
1290	UNDER	GO:0048666	neuron development	0.00749582	0.000828079	337	459
1291	UNDER	GO:0006458	'de novo' protein folding	0.00754607	0.000834278	36	75
1292	UNDER	GO:0007528	neuromuscular junction development	0.00756142	0.000836624	15	42
1293	UNDER	GO:0042787	protein ubiquitination involved in ubiquitin-dependent protein catabolic process	0.00760916	0.000842559	113	181
1294	UNDER	GO:0045597	positive regulation of cell differentiation	0.00761037	0.000843347	184	271
1295	UNDER	GO:2000273	positive regulation of receptor activity	0.00772672	0.000857658	12	37
1296	UNDER	GO:0045428	regulation of nitric oxide biosynthetic process	0.00772672	0.000857658	12	37
1297	UNDER	GO:2001235	positive regulation of apoptotic signaling pathway	0.00772672	0.000858229	50	95
1298	UNDER	GO:0071482	cellular response to light stimulus	0.00793246	0.000881763	34	72
1299	UNDER	GO:0007163	establishment or maintenance of cell polarity	0.00804446	0.000894903	85	143
1300	UNDER	GO:0070372	regulation of ERK1 and ERK2 cascade	0.00806592	0.000898676	27	62
1301	UNDER	GO:0010171	body morphogenesis	0.00806592	0.000898676	27	62
1302	UNDER	GO:0010659	cardiac muscle cell apoptotic process	0.00807227	0.000900768	8	30
1303	UNDER	GO:1901031	regulation of response to reactive oxygen species	0.00807227	0.000900768	8	30
1304	UNDER	GO:0007155	cell adhesion	0.00819281	0.000914922	444	587
1305	UNDER	GO:0035306	positive regulation of dephosphorylation	0.00825395	0.000922459	21	52
1306	UNDER	GO:0009798	axis specification	0.00831991	0.000930544	32	69
1307	UNDER	GO:0050688	regulation of defense response to virus	0.00836251	0.000936744	37	76
1308	UNDER	GO:0051092	positive regulation of NF-kappaB transcription factor activity	0.00836251	0.000936744	37	76
1309	UNDER	GO:0014706	striated muscle tissue development	0.00844109	0.000946272	86	144
1310	UNDER	GO:0050982	detection of mechanical stimulus	0.00860038	0.000966666	14	40
1311	UNDER	GO:0007602	phototransduction	0.00860038	0.000966666	14	40
1312	UNDER	GO:0040008	regulation of growth	0.00860038	0.000967082	172	255
1313	UNDER	GO:0043401	steroid hormone mediated signaling pathway	0.00864716	0.000973084	40	81
1314	UNDER	GO:1901652	response to peptide	0.0086782	0.000978812	79	135
1315	UNDER	GO:0030216	keratinocyte differentiation	0.0086782	0.000978204	11	35
1316	UNDER	GO:0002755	MyD88-dependent toll-like receptor signaling pathway	0.0086782	0.000978204	11	35
1317	UNDER	GO:1903749	positive regulation of establishment of protein localization to mitochondrion	0.00868425	0.00098024	30	66
1318	UNDER	GO:0050765	negative regulation of phagocytosis	0.00872188	0.000985984	3	19
1319	UNDER	GO:1903204	negative regulation of oxidative stress-induced neuron death	0.00872188	0.000985984	3	19
1320	UNDER	GO:0046487	glyoxylate metabolic process	0.00882301	0.000998174	55	102
1321	UNDER	GO:0032846	positive regulation of homeostatic process	0.00894116	0.00101231	52	98
1322	UNDER	GO:0019722	calcium-mediated signaling	0.0090933	0.00103031	28	63
1323	UNDER	GO:0007050	cell cycle arrest	0.00916866	0.00103964	69	121
1324	UNDER	GO:0040039	inductive cell migration	0.00919094	0.00104295	0	11
1325	UNDER	GO:0035264	multicellular organism growth	0.00920595	0.00104782	38	77
1326	UNDER	GO:0044843	cell cycle G1/S phase transition	0.00920595	0.00104613	84	141
1327	UNDER	GO:0030858	positive regulation of epithelial cell differentiation	0.00940358	0.00107193	1	14
1328	UNDER	GO:0060452	positive regulation of cardiac muscle contraction	0.00940358	0.00107193	1	14
1329	UNDER	GO:0018401	peptidyl-proline hydroxylation to 4-hydroxy-L-proline	0.00941791	0.00107437	6	26
1330	UNDER	GO:0051607	defense response to virus	0.0094484	0.00107866	56	103
1331	UNDER	GO:1904181	positive regulation of membrane depolarization	0.00951197	0.00109163	5	23
1332	UNDER	GO:0060211	regulation of nuclear-transcribed mRNA poly(A) tail shortening	0.00951197	0.00109163	5	23
1333	UNDER	GO:0051901	positive regulation of mitochondrial depolarization	0.00951197	0.00109163	5	23
1334	UNDER	GO:0046579	positive regulation of Ras protein signal transduction	0.00951197	0.00109163	5	23
1335	UNDER	GO:0006073	cellular glucan metabolic process	0.00951197	0.00108982	97	158
1336	UNDER	GO:0051057	positive regulation of small GTPase mediated signal transduction	0.00951197	0.00109163	5	23
1337	UNDER	GO:0044042	glucan metabolic process	0.00951197	0.00108982	97	158
1338	UNDER	GO:0002753	cytoplasmic pattern recognition receptor signaling pathway	0.00953208	0.00109558	20	50
1339	UNDER	GO:0050679	positive regulation of epithelial cell proliferation	0.00953208	0.00109558	20	50
1340	UNDER	GO:0000819	sister chromatid segregation	0.0096057	0.00110486	115	182
1341	UNDER	GO:2001259	positive regulation of cation channel activity	0.00965604	0.00111562	13	38
1342	UNDER	GO:1901879	regulation of protein depolymerization	0.00965604	0.00111284	31	67
1343	UNDER	GO:2001257	regulation of cation channel activity	0.00965604	0.00111284	31	67
1344	UNDER	GO:0001649	osteoblast differentiation	0.00965604	0.00111522	63	113
1345	UNDER	GO:0009948	anterior/posterior axis specification	0.00965604	0.00111562	13	38
1346	UNDER	GO:0001906	cell killing	0.00965604	0.00111562	13	38

[truncated: 8 more sheets: Additional File K, Additional File L, Additional File M, Additional File N, Additional File O, Additional File P , Additional File Q , Additional File R]
